# Supplementary material
Source: Research Square preprint supplement (doi:10.21203/rs.3.rs-9439008/v1)
Supplement: Supplementary file 1 [file 37e9ae464ad64c64627f1984.pdf]

# Secondary structures of AtSRS Proteins

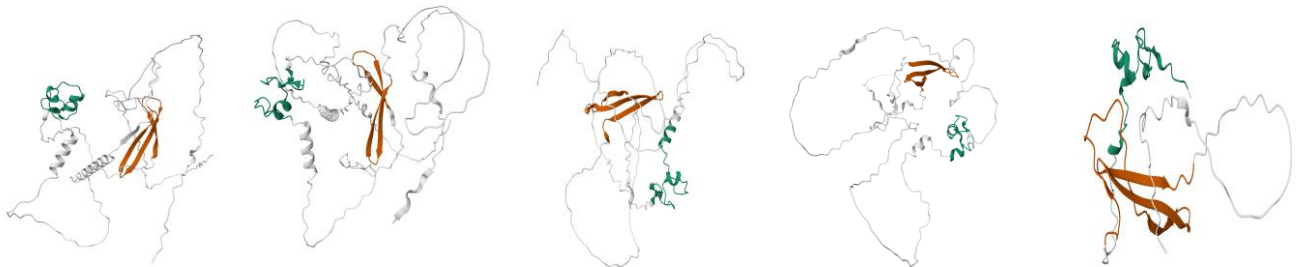

**AtSHI**

**AtSTY1**

**AtSTY2**

**AtLRP1**

**AtSRS3**

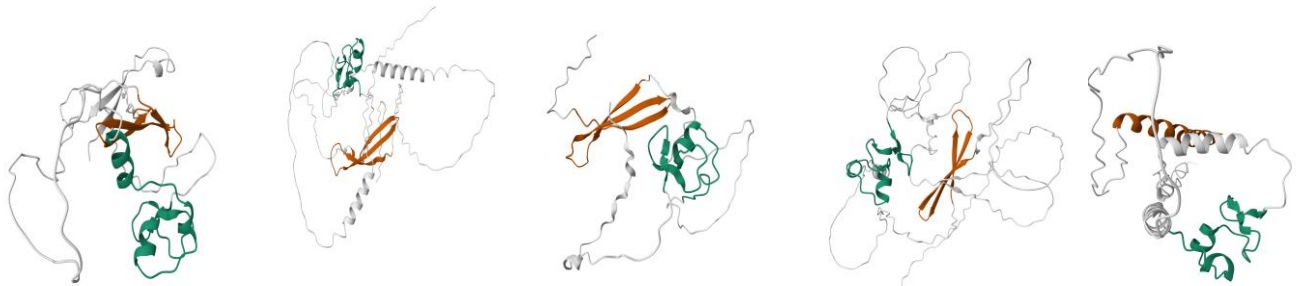

**AtSRS4**

**AtSRS5**

**AtSRS6**

**AtSRS7**

**AtSRS8**

## Ramachandran Plots

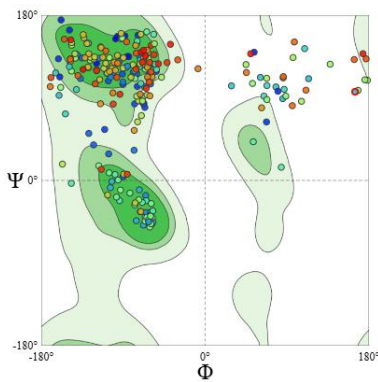

**AtSHI**

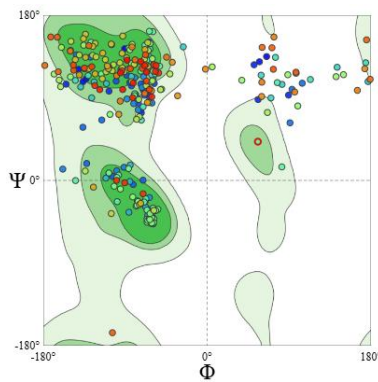

**AtSTY1**

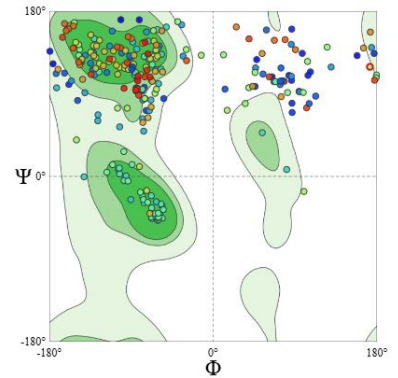

**AtSTY2**

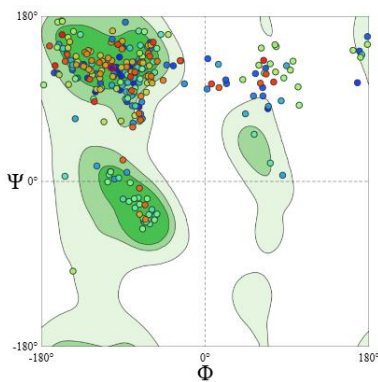

**AtLRP1**

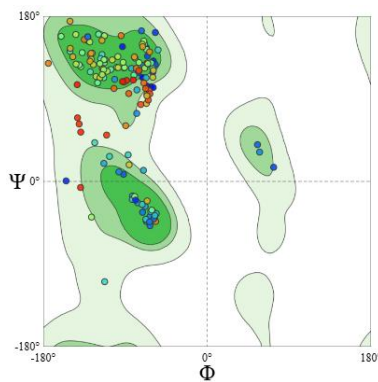

**AtSRS3**

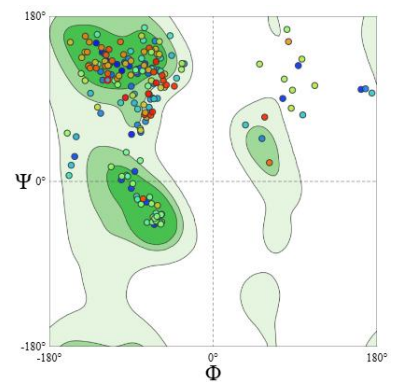

**AtSRS4**

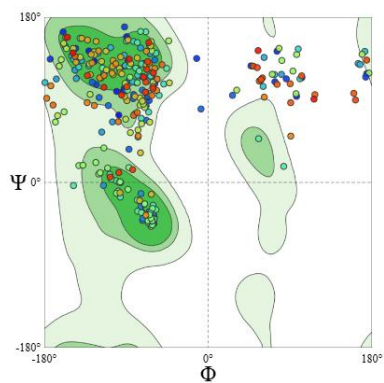

**AtSRS5**

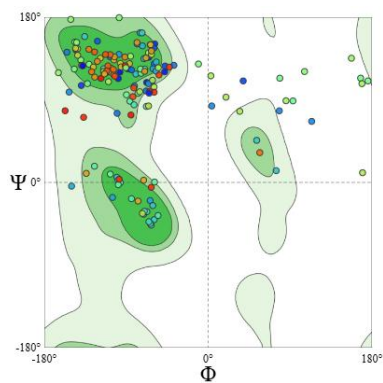

**AtSRS6**

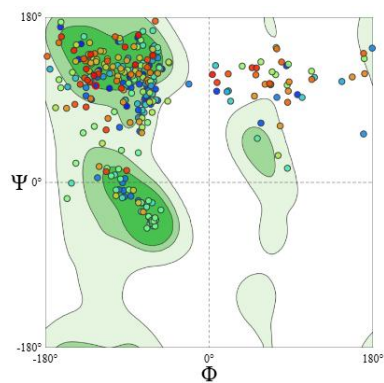

**AtSRS7**

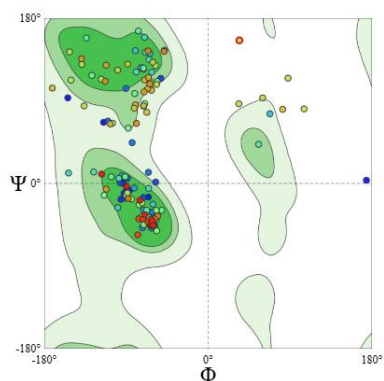

**AtSRS8**

| Protein | Template                | GMQE | Seq Identity | MolProbity Score | Clash Score | Ramachandran Favoured | Ramachandran Outliers | Rotamer Outliers | C-Beta Deviations |
|---------|-------------------------|------|--------------|------------------|-------------|-----------------------|-----------------------|------------------|-------------------|
| AtSHI   | Q9XGX0.1.A              | 0.57 | 100.00%      | 2.22             | 0.62        | 71.12%                | 11.85%                | 7.97%            | 25                |
| AtSTY1  | Q9SD40.1.A <sup>2</sup> | 0.54 | 100.00%      | 2.03             | 0.19        | 69.84%                | 13.86%                | 6.36%            | 28                |
| AtSTY2  | O65517.1.A <sup>2</sup> | 0.56 | 100.00%      | 2.15             | 0.44        | 59.38%                | 19.69%                | 5.73%            | 40                |
| AtLRP1  | Q94CK9.1.A <sup>2</sup> | 0.55 | 100.00%      | 2.1              | 0.44        | 70.44%                | 12.58%                | 6.35%            | 25                |
| AtSRS3  | A0A6J0JUD3.1.A          | 0.62 | 85.29%       | 1.62             | 0.38        | 84.52%                | 0.60%                 | 2.60%            | 1                 |
| AtSRS4  | Q9SI19.1.A <sup>2</sup> | 0.57 | 100.00%      | 1.8              | 0.3         | 72.73%                | 7.73%                 | 3.08%            | 11                |
| AtSRS5  | Q9LQZ5.1.A <sup>2</sup> | 0.55 | 100.00%      | 2.09             | 0.19        | 68.02%                | 16.28%                | 7.43%            | 28                |
| AtSRS6  | Q9M2U4.1.A <sup>2</sup> | 0.65 | 100.00%      | 1.91             | 0.7         | 79.01%                | 9.39%                 | 3.70%            | 12                |
| AtSRS7  | Q9FXH7.1.A <sup>2</sup> | 0.54 | 100.00%      | 2.16             | 0.78        | 66.18%                | 13.70%                | 5.14%            | 23                |
| AtSRS8  | F4KH89.1.A <sup>2</sup> | 0.58 | 100.00%      | 1.76             | 0           | 78.95%                | 5.85%                 | 4.67%            | 4                 |
