# Supplementary material
Source: Research Square preprint supplement (doi:10.21203/rs.3.rs-9439008/v1)
Supplement: Supplementary file 1 [file d1c8a67d1622b147c6b5250b.xlsx]

## Sheet: SP1 Biological Enrichment
		Enrichment analysis of Biological Processes
Enrichment FDR	nGenes	Pathway Genes	Fold Enrichment	Pathway	URL	Genes
2.6e-26	10	52	531.308	Auxin biosynthetic process	http://amigo.geneontology.org/amigo/term/GO:0009851	SRS7 SRS5 SRS4 SRS3 SRS1 SRS6 SRS2 LRP1 SRS8 SHI
1.03e-24	10	78	354.205	Auxin metabolic process	http://amigo.geneontology.org/amigo/term/GO:0009850	SRS7 SRS5 SRS4 SRS3 SRS1 SRS6 SRS2 LRP1 SRS8 SHI
5.33e-23	10	118	234.136	Hormone biosynthetic process	http://amigo.geneontology.org/amigo/term/GO:0042446	SRS7 SRS5 SRS4 SRS3 SRS1 SRS6 SRS2 LRP1 SRS8 SHI
8.75e-22	10	159	173.761	Hormone metabolic process	http://amigo.geneontology.org/amigo/term/GO:0042445	SRS7 SRS5 SRS4 SRS3 SRS1 SRS6 SRS2 LRP1 SRS8 SHI
2.35e-20	10	224	123.339	Auxin-activated signaling pathway	http://amigo.geneontology.org/amigo/term/GO:0009734	SRS7 SRS5 SRS4 SRS3 SRS1 SRS6 SRS2 LRP1 SRS8 SHI
4.12e-20	10	241	114.639	Cellular response to auxin stimulus	http://amigo.geneontology.org/amigo/term/GO:0071365	SRS7 SRS5 SRS4 SRS3 SRS1 SRS6 SRS2 LRP1 SRS8 SHI
1.26e-19	10	273	101.201	Regulation of hormone levels	http://amigo.geneontology.org/amigo/term/GO:0010817	SRS7 SRS5 SRS4 SRS3 SRS1 SRS6 SRS2 LRP1 SRS8 SHI
7.68e-18	10	415	66.5735	Response to auxin	http://amigo.geneontology.org/amigo/term/GO:0009733	SRS7 SRS5 SRS4 SRS3 SRS1 SRS6 SRS2 LRP1 SRS8 SHI
8.75e-17	10	544	50.7868	Positive regulation of transcription, DNA-templated	http://amigo.geneontology.org/amigo/term/GO:0045893	SRS7 SRS5 SRS4 SRS3 SRS1 SRS6 SRS2 LRP1 SRS8 SHI
8.75e-17	10	545	50.6936	Positive regulation of RNA biosynthetic process	http://amigo.geneontology.org/amigo/term/GO:1902680	SRS7 SRS5 SRS4 SRS3 SRS1 SRS6 SRS2 LRP1 SRS8 SHI
8.75e-17	10	545	50.6936	Positive regulation of nucleic acid-templated transcription	http://amigo.geneontology.org/amigo/term/GO:1903508	SRS7 SRS5 SRS4 SRS3 SRS1 SRS6 SRS2 LRP1 SRS8 SHI
2.04e-16	10	598	46.2007	Positive regulation of macromolecule biosynthetic process	http://amigo.geneontology.org/amigo/term/GO:0010557	SRS7 SRS5 SRS4 SRS3 SRS1 SRS6 SRS2 LRP1 SRS8 SHI
2.34e-16	10	611	45.2177	Positive regulation of RNA metabolic process	http://amigo.geneontology.org/amigo/term/GO:0051254	SRS7 SRS5 SRS4 SRS3 SRS1 SRS6 SRS2 LRP1 SRS8 SHI
2.76e-16	10	630	43.854	Positive regulation of cellular biosynthetic process	http://amigo.geneontology.org/amigo/term/GO:0031328	SRS7 SRS5 SRS4 SRS3 SRS1 SRS6 SRS2 LRP1 SRS8 SHI
2.76e-16	10	630	43.854	Positive regulation of nucleobase-containing compound metabolic process	http://amigo.geneontology.org/amigo/term/GO:0045935	SRS7 SRS5 SRS4 SRS3 SRS1 SRS6 SRS2 LRP1 SRS8 SHI
3.39e-16	10	647	42.7017	Positive regulation of biosynthetic process	http://amigo.geneontology.org/amigo/term/GO:0009891	SRS7 SRS5 SRS4 SRS3 SRS1 SRS6 SRS2 LRP1 SRS8 SHI
3.1e-15	10	811	34.0666	Positive regulation of nitrogen compound metabolic process	http://amigo.geneontology.org/amigo/term/GO:0051173	SRS7 SRS5 SRS4 SRS3 SRS1 SRS6 SRS2 LRP1 SRS8 SHI
4.16e-15	10	840	32.8905	Positive regulation of macromolecule metabolic process	http://amigo.geneontology.org/amigo/term/GO:0010604	SRS7 SRS5 SRS4 SRS3 SRS1 SRS6 SRS2 LRP1 SRS8 SHI
5.42e-15	10	867	31.8662	Positive regulation of cellular metabolic process	http://amigo.geneontology.org/amigo/term/GO:0031325	SRS7 SRS5 SRS4 SRS3 SRS1 SRS6 SRS2 LRP1 SRS8 SHI
9.56e-15	10	922	29.9653	Positive regulation of metabolic process	http://amigo.geneontology.org/amigo/term/GO:0009893	SRS7 SRS5 SRS4 SRS3 SRS1 SRS6 SRS2 LRP1 SRS8 SHI
1.15e-14	10	944	29.2669	Hormone-mediated signaling pathway	http://amigo.geneontology.org/amigo/term/GO:0009755	SRS7 SRS5 SRS4 SRS3 SRS1 SRS6 SRS2 LRP1 SRS8 SHI
1.16e-14	10	949	29.1128	Regulation of biological quality	http://amigo.geneontology.org/amigo/term/GO:0065008	SRS7 SRS5 SRS4 SRS3 SRS1 SRS6 SRS2 LRP1 SRS8 SHI
1.86e-14	10	999	27.6557	Cellular response to hormone stimulus	http://amigo.geneontology.org/amigo/term/GO:0032870	SRS7 SRS5 SRS4 SRS3 SRS1 SRS6 SRS2 LRP1 SRS8 SHI
2.62e-14	10	1038	26.6166	Cellular response to endogenous stimulus	http://amigo.geneontology.org/amigo/term/GO:0071495	SRS7 SRS5 SRS4 SRS3 SRS1 SRS6 SRS2 LRP1 SRS8 SHI
6.17e-14	10	1135	24.3419	Positive regulation of cellular process	http://amigo.geneontology.org/amigo/term/GO:0048522	SRS7 SRS5 SRS4 SRS3 SRS1 SRS6 SRS2 LRP1 SRS8 SHI
9.46e-14	10	1189	23.2363	Cellular response to organic substance	http://amigo.geneontology.org/amigo/term/GO:0071310	SRS7 SRS5 SRS4 SRS3 SRS1 SRS6 SRS2 LRP1 SRS8 SHI
4.49e-13	10	1394	19.8192	Positive regulation of biological process	http://amigo.geneontology.org/amigo/term/GO:0048518	SRS7 SRS5 SRS4 SRS3 SRS1 SRS6 SRS2 LRP1 SRS8 SHI
1.65e-12	10	1593	17.3434	Response to hormone	http://amigo.geneontology.org/amigo/term/GO:0009725	SRS7 SRS5 SRS4 SRS3 SRS1 SRS6 SRS2 LRP1 SRS8 SHI
2.02e-12	10	1631	16.9393	Response to endogenous stimulus	http://amigo.geneontology.org/amigo/term/GO:0009719	SRS7 SRS5 SRS4 SRS3 SRS1 SRS6 SRS2 LRP1 SRS8 SHI
3.25e-12	10	1716	16.1002	Cellular response to chemical stimulus	http://amigo.geneontology.org/amigo/term/GO:0070887	SRS7 SRS5 SRS4 SRS3 SRS1 SRS6 SRS2 LRP1 SRS8 SHI

## Sheet: SP2 Molecular Enrichment
		Enrichment analysis of Molecular Processes
Enrichment FDR	nGenes	Pathway Genes	Fold Enrichment	Pathway	URL	Genes
7.7701e-10	10	2591	10.6631	DNA binding	http://amigo.geneontology.org/amigo/term/GO:0003677	SRS7 SRS5 SRS4 SRS3 SRS1 SRS6 SRS2 LRP1 SRS8 SHI
1.61211e-08	10	3914	7.05876	Cation binding	http://amigo.geneontology.org/amigo/term/GO:0043169	SRS7 SRS5 SRS4 SRS3 SRS1 SRS6 SRS2 LRP1 SRS8 SHI
1.61211e-08	10	3893	7.09684	Metal ion binding	http://amigo.geneontology.org/amigo/term/GO:0046872	SRS7 SRS5 SRS4 SRS3 SRS1 SRS6 SRS2 LRP1 SRS8 SHI
6.55518e-08	10	4634	5.96202	Nucleic acid binding	http://amigo.geneontology.org/amigo/term/GO:0003676	SRS7 SRS5 SRS4 SRS3 SRS1 SRS6 SRS2 LRP1 SRS8 SHI
0.00293796	2	131	42.1802	Protein heterodimerization activity	http://amigo.geneontology.org/amigo/term/GO:0046982	SRS1 SHI
0.00373404	3	669	12.3892	Protein dimerization activity	http://amigo.geneontology.org/amigo/term/GO:0046983	SRS1 LRP1 SHI
