# Supplementary material
Source: Research Square preprint supplement (doi:10.21203/rs.3.rs-9439008/v1)
Supplement: Supplementary file 2 [file 675c1a8fcffc04e1ae54aabb.pdf]

## Protein Sequences

>AtSHI

MAGFFSLGHGGGGNTPDNHRTNTNPNSSSGTESWLWCRNPNSNADGGEAGPSYKGTLELWQHPNNQEIIFQQQ  
QQQQRLDLYTSAAGLVGSPNSRLIETSGGALMMMRSGSGGGPSCQDCGNQSKKDCSHMRCRTCKKSRGLDCPT  
HVKSTWVPAAKRRERQQQLSTGQQPQLGGSVPKRQRERIPARSTSMAYTRIPSNNTSGLEVGNFPPEVSSSAVFR  
CVRVSSVDEEEYAYKTAVSIGGHVFKGVLYDQGAERSSSGGSQPLNLITAGPSASSSSPNVSCNNGVVGSTSDHY  
IDPASLNYPTPINTFMTGTHFFSNRS

>AtSTY1

MAGFFSLDGGGGGGGGGNNQEDHRSNTNPPPVSEAWLWYRNPVNVANANTNVNANAPSSSNAALGTLELWQ  
NHNQQEIMFQHQQHQQLDLYSSAAGLVGSPNHNQFDISGETSTAGAGRAAAMMMIRSGSGGGGGVSCQDCG  
NQAKKDCSHMRCRTCKKSRGFECSTHVRSTWVPAAKRRERQQQLATVQPQTQLPRGESVPKRHRENLPATSSSLV  
CTRIPSHSGLEVGNFPAEVSSSAVFRVSVSVEDEEEFAYQTAVSIGGHIFKGILYDLGPGSSGGGGYNVVAAGES  
GGGAQQLNLITAGSVTVATASSSTPNLGGIGSSAAAATYIDPAALYPTPINTFMAGTQFFPNRS

>AtSTY2

MAGIFSLGGNNNNNGDEEEENQQQKTNWVWYRSNANTNINPNSSSQVWQIPPEQMLMHHSHPPQQSLDL  
YPGHQIDVSDLATSSRSITISCRDCGNQAKKDCSTMRCRTCKKSRGFDCSTHVRSTWIPVARRRERQQQLHMSTSG  
GGGGSGGGAGGGSSIPKRHRDPTLPGTSSSRLPSSHAGLEMGEASFPGEVSSDALFRCVKMSGVDDGGDGQYAY  
QTTVNIGGHLFKGILYDQGPESYMSGSGSDHQSSAGGGGGHPFNPPVTDGGGGVSSAMFVDPNSGGYSSN  
MTTSVFMPPGTQFYQNPFRS

>AtLRP1

MGMVGLRDVFLVAPAYHHQNAGVISGSDHMNSNAAAAALGVGVIPLLTAGTPQQNVEDSDINFLGNNRRWQNN  
NNNHETQYLHFKSTNQTTVGTSSNNSGSGSGASGTATCQDCGNQAKKECKQRRRCRTCKKSRGFDCSTHVKSTWVS  
AARRRERQVMPTGANPTAGSSLSTSSGTTKPRIVGSQQQQQATSHSTSNTPPQSFETSSSRQDGGGSREAWPG  
QVRAAAVFKVVRTAVEDGDDEYAYQAVVKIGGHVFKGFLYDQGLEPKKEGFPSMSDLHLGGSANNHNGVSASAPIL  
DPPNVVYGGGGSGGGFY

>AtSRS3

MMMIMGRKCEDCGNQAKKDCVYMRCRTCKKSKAFHCQTHIKSTWVPAYRRSHHKHQSPLSTSIPKGVQIHTTPG  
HFPALSSLADFRVCVSSIDDGKEQYAYQTTVNIGGHVFRGILHDQGLHKVMVDHNYNKNNSNHQELLTPSTSSC  
PLKITSPTDFMFGTRFSSVLR

>AtSRS4

MSNFEMAGTGSSRNNEEDNQNTNWWYKHTNNNLSTSHNNQIWQQPSLDLYPGQIDVCDMTTSSRSLTISCQE  
CGNQAKKGCTHGRRCRTCKKSNGLHCPHVRSTWIPIAKRRERQQQLQTPSTNPTGGSGRVGKYRDINQHATLDSSG  
LEMGETRFPDEVSSDALFRCVRMSGTDDGEGQYAYQTTVGIAGHLFKGILYNQGPENKSMRSTQFYENPPRS

>AtSRS5

MAGFFYLGGRDNNSNNKQDHHQVDKDHQDKSNLYLYKDEIYNNKGFIEWPPQYFQQQEHQQQQQQQ  
HASAPANFYSGFMVPSGSSNNNNRSLYFNVSDHEPGGFTVTRQGMNCQDCGNQAKKDCPHMRCRTCKK  
SRGFHCQTHVKSTWVPAAKRRERLAQLASLQHHSASRETQNAKRLREASGGDNDKDHSGGGGSALANTRVV  
NANSNGLEVSQHLPEVNSPAIFRCVRSIEEDEDQAYAYQTAVNIGGHIFKGILYDQGPEHQDNHLLNLLASTA  
TTTNVEETATKTVTGNNNGLMLDPSSLYPAQLNSFIAGTPFFTPRS

>AtSRS6

MLGLRNIILLSPPPTQITRPSLPPVNFAAVEDNNTVGEKVCRCGNRAKKECLFERCRTCKSRGYNCVTHVKSTWI  
PSSATRSSSSPSEKKKLKDQKQSSPNVSLPTTTSRQERGFREGLPGKIEAPAVFKRTRVTAISNNEQAEIGYQATVTI  
SGHIFKGFLLHYGVDHNKAFPLCSQK

>AtSRS7

MAGLFYLGGRDHNKQDHHQEKDHNEDKSNNYLYLYKDEIYNNKGFEIFPPQYFQQQQQNHAAAAPTNYLSFGM  
VPSGGNINNNRSTNRSLYFNVDHEPVRSSSTGGFTVTRQGNMNCQDCGNQAKKDCPHMRCRTCKSRGFDCQT  
HVKSTWVSAKRERQAQLAVLPAKRIRDANSRGGGDDDDDDKEDEKNDSCGGGSALACTRVVNASSSGLETSHL  
PPEISSPAVFRCMRVSSIDDEEYAYQTAVSIGGHVFKGILYDQGPSSDHHRYSSSLNGETSHQHHLNLMSTPSAA  
TTNAVAVNTNNGSIDPSSLYTAVATPFNAFVAGGTPFFASSRC

>AtSRS8

MDMNMEKIFEDSVPCRVRRAKRGKATHPRISIAERAAMMMIRSGGSGGGVSCQDFGNQAKKDCSHMRCRTCKS  
RGFECSTHVRSTWVPATKRRERQQQLATVQPQTQLPRGESVPKRHRENLPATSSSLVCTRIPFHSGICHCNVYLFM  
CIYICLLLYGREIYNEMQAAFL

### Genomic Sequences

>AtSHI

TTTAATTATAGTAGCATTTTGGCAAACACAAACAGACAAACAAAGGAAGAGGCAGCGTGTTCCTCGGTAGAGAAAA  
GACGGAGAGAGTAAAAGCCGAAGTTGTAAACGTGGCAACATATTGACCGCAGGATCTAAAACACGTGATGATCAAC  
GGTAAGATATATCTTGTCCGAGAAGTGTTCGTGATATTAATTGGTGTAAAGAAAATCTGGAAAACAAAACAAAAA  
GAAAAGAGAGACAGAGAATTTAATAAGAGAGGAAGAGTATTAAGGTGATGGCGGCGTTCAGAGCGCGAGACAGA  
GAAAGAAACCTCTCTGAGATACATCTCTCTCTCTCTATCCCCCTTAAATACACTCCATACCGACAAACCAACT  
TTTTTCTCAGTACTAAAAGAAACCTCTATTCGATTTCTAAACAAACCTAGATATAGACTACTCTACATTCTCCATT  
AAGTTAATCTCTTCGTCTCTCTCTCTCATCCTCTCATAATTAAGATCTCTATCAAGAGAGAGATCTTTTATTG  
TCTTCTCTGTAAATCTTTTGATAGATCTTCACTCTCTGAAAGTCAAGATCTTAGTCTAGGCAAGTAAATATGTG  
GTAAAGCAAAGCCCTTCTGAAATTGGTCATATATGGCTGGTGGTATCGGAAAATGGCAGGATTTTCTCGTTAGG  
ACACGGCGGAGGAGGAAACACTCCAGACAACCACAGAACAAACACTAATAATCCTTCTTCATCGGGAACAGAATCT  
TGGCTTTGGTGCAGAAACCCTAACTCTAACGCTGACGGTGGAGAAGCTGGTCCCTTCTTACAAAGGAACCCTTGAGC  
TATGGCAACACCCAAACAATCAAGAAATCATTTTCCAGCAGCAGCAGCAACAGCAACAAAGGCTGGATCTTTACAC  
TTCCGCTGCGGGTTAGGTGTTGGACCGAGCAACCGGAGCTTAATTGAAACTTCCGGCGGTGCGTTGATGATGATG  
AGAAGCGGTAGCGGTAGCGGCGGACCAAGCTGCCAGGATTTGTGGGAATCAATCTAAGAAAGACTGCTCTCACATGA  
GATGTAGGACTTGCTGCAAGAGCCGTGGCCTTGACTGTCCCACTCACGTGAAGAGCACGTGGGTTCTGCCGCTAA  
ACGCCGAGAACGCCAGCAGCAGCTTCTACCGTCAACCGCAGCAACTGGGAGGGAGCGTCCCTAAACGACAG  
AGAGAGCGTATCCCGCGAGATCGACTTCCATGGCCTACACTCGTATACCTTCTAACAACACTTCAGGTATTTTATA  
ATATCTCTTTATGGTTATTCACCCCTGAATGAAAATTAAGTAATGAGCTTTGAATAACTTGAGTTATTAGTTTTCAA  
TTGCAGAAACAGAAACCCTATTTTGATCAGCTTTTTTTGTTCTTCTTTTTCATTTTCAAGAAAAAAAAGGTGA  
ACGATTTTCTTCTCCTATTTTTTTTTTAATATGAAATACTGTAGATCAGTAAGACTGACTCTTGGAATGACAG  
GAAGAACTGTTCTCACTGATCTTGATATTTGTGTTTATATCCTGTAATTATTAAGTTTTGTTTATTTGTTTGT  
ATGCTGTAATTATTAATTTGAGTTAAGATAAAAAACAAACAAACAAATCATACGTTGAAAATACTCCTACGATTTTT  
CTTATAATTAACAATAATTAATAAATGTTTTCTATCTAGGGTTGGAGGTTGGGAATTTTCCGCCGGAAGTTAGCTC  
GTCGGCAGTTTTTTCGGTGGTGGTGTGAGTTCCGTAGATGATGAAGAAGAAGAGTATGCATATAAACAGCTGTG  
AGTATAGGCGGTACGCTTCAAAGGTGTTCTCTACGATCAAGGCCGCGGAGAGAAGCTCCTCGGGCGGTGGATC  
TCAGCCGTTGAATCTCATAACCGCAGGCCCATCGGCCTCATCATCAAGCCCAAACGTGAGCTGCAACAATGGAGTCG  
TTGGCTCCACTTCAGATCATTATATCGATCCTGCCTCACTTAATTTATCCTACTCCCATTAACACTTTTCATGACTGGTA  
CGCACTTCTTCTCAACTCAAGATCTGAAATCCACACAGAGAGAGTACAACAAATCATAACTTTTTTTTTTAGATTCT  
TACGGTAGAATTAGGGTTTTAAACATCTTCGGAGGTGAAGATTATAACGTACTAATCTTGGTTTTCAAAGTAATT  
AACTAAGGGAGATAATGTTCTATTAACAATGTTTACCTGATCTTTTATTATTAAGTTCAAATTTTTGTAGGTATAA

TGTTAATGTAATAGTATACTCCAATTTTCAACTGTTACAAAAGTCAACGACCCTGTCTCTGTGAAAGCTCACATCAA  
AAGCAAGATTTGAGCTGGCAGTTTTTCAACTGTGATCGTTAAACTCAGCCTTGTTTTATTGTCAGCTTTTCACATT  
ACTCTTTTTTTAGGTTTACTTTAACATTAATTTACCTTTCAAATTACTACTTTAGGTCAATTAATTGCAATTATGAT  
TTGCCTGTAGAAATATTAATGTGAAAAACAAGTTACAAAATTGAAATTTGGGTGAAGACATGTATTTAGGTGTCT  
TGTGCTTTTGGTCAACAAATCAGACACACTAGCACAGGTATATCGTTCGTCTACGACTACTATATATCCGGCAATATG  
CCATACCCTAATCTTAAGTTTTATTTCAGTTTGAGCCGTTTTTAAAGTGATGCTCTCATTCCCTATGATTGATATAATGT  
CAGTACACTTACATTTGAAGAGAGACTTACTGCCACATCCGACTCTTTACATTATTTTTTATATATATATATCCTGAT  
AGCCAGTTTCTCCATATTTCTATCTTACATAGTTTTTACATCGTACGTTACGGTGTATTTTTTTAGCCACATCTGAAGG  
GGCTTTACTATACAAATCTCAAATGCAATCCCCAAAATCTGACAAGCAGTGAGACTGTATGTGATTTTTGATTCTTT  
TGTTACAACGAGTGAGGCTGTAAATTCGGCAGATTATGAGTGAGTGGGGGAACAGAAAAAGGTGTAATAATTGGTAT  
GCATCTTTATTTCTGCAGGTGTTTATGTTTGGACCTAAAAAACTCTTCTTTCCCAATTCATTTCTTAGGCTCTCTT  
TTTCATTATTCATTTACGTCACCTCAAGAAAGCCATGATGATAACGAGATGCAAAAAGAATCGGAAAACGAGCTA  
ACATTATAATAACTCATTTAGGATTTAAAATTTAATTAAGTGTTGCATGGAGTTGTGAAGACTTGTAATAAAGATGCAC  
ACAAATCATGCATTTTGTGATTTACATTTATATCATTCTATAATTGAATTTGGTCCCATTAAACCTTAAACAGCTAATC  
CCACCTTGCTTATGCTGATTTGTCCCCGATTATTTCTCCGTACTACTCGCACCATGTCTTCGAAATTTCTCTTTTGG  
AAAACCTAAGTTGCTTTTTATTTTTCTTGGTCAAGCAAGACTCAAGAGTTTGATGTTGTTGCACGTAGAAAGGATCT  
TGAAGACGGATGTGGATGGTGATAAAAGCAGCAACTTTAAACTCCGAACGCAAGTGGGGCCTTAGGAAATTTTAC  
TGTGAACCAATAAGAGAGTAACACGTCTGAGGGACAATTTGCAATTCATCATTGCATTTCAAGGGGACAAAACAG  
AAGCCTCAGGTC

>AtSTY1

AACAAAATTATATTTTTGCAAAATCTGGAAAAACAAAACAAAGAAAACAAAACAAATGAAGAAGAGATGAGAGGAGA  
CAGAGAATTAATTAGAGGAGCAGAAGAGAGAGAGAGAGATATAGAGATTAATAAGGTCATGGCGCGCTTGCAG  
AGCGCAAGAAAGATGATTTAAATCTCTCTTCTTCTTCTTCTTCTTACATATCTCTGTGTGTTTCTTAAATACTCTC  
TCTCTCGTACCGACAAACAAGTTTTGCTTTTTTCATCAGAGTCTCAAAAAGCTATTCCAACCTCAATACACTACAAAC  
CCAGAGAATGAATTC AACCTAAAAACCCTAGAAATCCTCTAAGATCTAGAGTGAGAAAAGTTAGAGTGATAGAACTA  
CAAAACATAGGATCTTTGGTTTTGGGTTTTGTTCATTTTCTTGATTGGTTAGTGGGTGAGTGGTGGTTATGGGTG  
GTGGTTGTTGTCTTGGTGAATGGCGGGTTTTTCTCGCTAGACGGTGGTGGAGGAGGCGGAGGTGGAGGTAAC  
AACCAAGAAGATCACCGGAGCAACACAAATCCTCCTCCGCTGTATCAGAAGCTTGGCTCTGGTATAGAAACCCTAA  
CGTTAACGCAAACGCAAACACAAACGTTAACGCAAACGCTCCTTCTCGTCAAACGCTGCTTTAGGAAACACTTGAG  
TTATGGCAAACCAACATCAGCAAGAGATCATGTTTCAGCATCAGCAACATCAGCAAAGTTGGATCTTTACTCTT  
CCGCCGAGGTTTAGGTGTTGGACCAAGTAATCATAACCAATTCGATATCTCCGGCGAAACTTCAACCGCCGGCGCC  
GGAAGAGCTGCGGCGATGATGATGATTTCGTAGTGGTGGTAGCGGAGGGAAGTGGTGGTGTGAGCTGTCAAGACT  
GTGGGAATCAAGCGAAGAAAGATTGTTCTCACATGAGGTGTAGA ACTTGTGTAAGCCGTGGCTTCGAGTGTTT  
TACTCACGTGAGAAGCACGTGGGTCCCTGCTGCTAAACGCCGTGAGAGACAACAGCAATTAGCTACGGTCCAGCCTC  
AAACTCAGCTGCCTCGCGGTGAGAGCGTTCC TAAACGCCACCGTGAAAATTTACCGGCAACTTCATCGTCTCTTGTG  
TGCACTCGCATACCTTCTCATT CAGGTATATGTCACTGTAATGTGAAATATTTATTTATGTGTATATAAATATATATG  
TTTATTATATATGGTGGTGGAGATAATGAAATGCAAGCAGCATTTTTTTATAATTTATATAAGTAACGAATTGGGATC  
AGCTTCTAGAGTAAAAAAGAAAAACCCTATTTTTGATTTATAAGTTTTCCAAAATAAGTTTTGTTTTTTATTTTGT  
GATTTAATTGTGAAAATACTGTGTTGGAGTAAACTGACTATTTGGAATGACAGGAACAAGCTGTCTCACAAATC  
TTGAAATCTGTGTTCTTTCTCTAATTTCTCAGCTCCTTTTTTATAACCTTAATTTTTGAAAGAAAAAATGAATATCAAT  
GTTTTATTCTATTACGTATCTCTTAAACTTTTTTTTTCTTACTCTAAATTTCTAGGGCTAGAAGTTGGCAATTTCCCGG  
CGGAGGTGAGTTCATCGGCGGTGTTTAGGTGCGTGCCTGTGAGCTCAGTAGAAGATGGAGAAGAAGAGTTTGCTTA  
CCAAACAGCTGTAAGCATTGGTGGTCACATTTTCAAAGGCATTTTATACGACCTCGGTCTGGAAGTAGTGGTGGC  
GGAGGCTACAACGTTGTTGCCGCCGTTGAGAGCTCCTCTGGTGGTGGTGGAGCTCAACAGCTGAATCTCATAACAG  
CTGGCTCTGTAACGTTGCTACCGCTTCTTCTCTACTCCAAACCTCGGTGGTATTGGCAGCTCATCAGCCGCGGCA  
GCCACGTACATTTGATCCAGCCGCTTTTATCCAACCTCCGATCAATACATTCATGGCCGGTACACAATTTCTTTCCCAAC  
CCAAGATCATGAGGAAAATCTGACATAAAAGCAACATAACTCTTTTGAATTTCTAGAATAGAATTAGGGTTTATAA  
ACGTTAATTGTGGATCATATTTATATAAAAGAGTATGCAGAAGTGGGGAAGTGAATCTGTTTATGCTTCCCCTACTT



TCGAAACAACCGGAGATGGCAGAATAACAACAACAACCACGAAACGCAGTATCTTCACTTCAAGAGTACTAACCA  
GACAACGGTTCGGAACGAGCTCGAACAACCTCGGGGTCTGGCTCAGGCGCATCAGGAACCGCCACGTGTCAAGACTGT  
GGAAATCAGGCGAAGAAAAGAGTGTAAGCAGAGGCGGTGTAGGACTTGCTGCAAGAGCCGTGGCTTTGATTGTTCTA  
CTCACGTGAAGAGCACGTGGGTCTCTGCTGCTCGGCGGAGAGAGAGGCAGGTCATGCCTACCGGCGCTAATCCAAC  
GGCTGGCTCGTCTCTTTTCGACCTCCTCCGGGACGAAGAAGCCGAGGATCGTAGGGTCTCAACAACAACAACAACA  
CAAGCCACTTCTCATACTTCAACTTCTAACACACCACCTCAAAGTTTTCGAGACCAGCTCCAGCCGACAAGGTAGTTT  
TACATTTTCATTAGTATACATAGCTACATGATTTTATGTATGTATATACATGCATATAACACTATTAGCCCTTCTTGAA  
TATTATTGTTATGGTGATCAATCAAAGTTTGGTGTCTTTCTAACCAAAAATAAAACTTAATATCGTTTGGATCGGTTT  
TATATGGTTTTAGTTAAAGAAATTTATCAATAATTTTCTGAACTTTTGAAGTTGTGATCAGTCTTTTGTTCGCTTC  
AAAATGGTTGTTGTTGGCTATGGAAAAATGGGATTGTTTTAACCATATAGAATTATAGTCAGTTTAAAGTCTCTTA  
TTTCGGTTTTGTTCCGATTAGTTTTATCCGTATTAAAAAACATTGTATTTGATAATAATAAACACTCTTAATATCATGAT  
ATGGTGATAATGATTCATAATATGTTTTATGTATGCAAGACGGAGGAGGGTCAAGGGAAGCATGGCCAGGGCAGG  
TTAGGGCAGCGCGGTGTTCAAGTGTGTTAGAGTAACGGCAGTGGAGGACGGGGATGATGAGTACGCGTACCAAGC  
GGTGGTGAANAATCGGCGGCCATGTCTTTAAAGGATTTCTGTACGATCAAGGGCTTGAACCAAAAAGGTTTTCCCT  
AGTATGTCGGATTTGCATTTAGGTGGTTCAGCCAATAACCATAACGGAGTTTCTGCCTCGGCGCCTATTCTCGACCC  
GCCTAATGTTGTTTTATGGTGGTGGTGGAGGTTTCAGGCGGTGGGTTTTACAGTTAAACCAAATTCAGAAAAGTTTAC  
TGTTTTAAAGAAAAGATTTTCTCTAATGTTTTTATCCAGTGGGGTTAGATACAAACGAATATTTCACTGTTGTATGA  
ATTGTCCATTTGGACAAACTACTTCTAATGCTGCAACAGACGAGTATCGACAGATTTTATTTTACTTAACTGGTAG  
TGTATAAACACCTAACGTTTTGCTTGAATGGCGTTTTTTTTAAGTATAGATCTCATGTATTCCTAGGACTGAAACA  
CCCGCACGAAAATATGCGGCAACTCATACATAAAAACCATATTTGTTTGT

>AtSRS3

ATTTATACTAAATTATATATTTACACATATCATGCTTATATATATATACACATGTATATAATGGGAAGGCAGAGGTAAT  
GATGATGATGATAATGGGGAGAAAATGTGAAGATTGTGGGAATCAAGCGAAGAAAGATTGTGTGTACATGAGATGC  
AGAACCTTGCTGCAAATCCAAAGCCTTCCATTGCCAACTCACATCAAGAGCACTTGGGTTCTGCCTATAGAAGATC  
TCATCACAACACCAATCGCAACCGCTCTCTACTAGTATCCCAAAGGTATGAGAGAGCAACAACAACCTTCAAATTT  
CTTGTCTTCATCAGGTTCTTATCTCCTACTCTTATTTAATTATGCTCATGTATAAGTGCATGTTAATTTTTTTCTCT  
CACCATAAAACATCTGAATTTTTGGGGTCTTTCAAATTTCAATTTCTGAGTTAATTGTATATGCCTAAAGAT  
AGAGAAATGAGATTTTTCGGATCTCATGAACCTTTAAACAAGACTTGCTAGTAAGTGCAAATAAGTACACTACATATTG  
ATGTATCCTTGTGTGTTGTGATGATGTTTATGATCTATGTCTATTTTTATATCAATCGATAAGGAATTAGGTTTTTT  
CTTCTCCTCTATCTCGATGTTACTATTTGATCATGTAATAATGATCACAATCCTGCTTTTGATTTTAGATTTTTGGTA  
TTCTTTTTTTGATTTCTTGATTTTTGAAGTGGATTACGTAGTAAATATATAAACAACGCTCTCTAGTTATGATCTTTG  
ACAAATTGAGAAATGTAGGAATCTTGTTTTTTCACTAATTACTTTAATGGCTTACTTAAAGAAAAATAATTGATGCTA  
ATAAAATTATTAGACAAACAGACTTATCGTGTTGAAACATTCTTTCTATTTTAGGTGTACAAATCCACACTACTCC  
TGGACATTTTCCGGCAGAGTTGAGTTCCCTAGCAGATTTCCGATGCGTAAAAGTGAGTTCAATCGATGATGGAAAA  
GAGCAATATGCTTATCAGACCACGGTGAACATTTGGAGGACATGTTTTTCAGAGGGATTTCTCAGGATCAAGGACTCC  
ACAAAGTGATGGTAGATCATTTATAATAAAAAATAGTAATAATCATCAAGAGTTACTTACTCCTTCAACTTCTTCA  
TGTCCCTTGAAGATCACAAGTCCTTTTACCGATTTTCATGTTCCGGTACCCGATTTTCTTCGGTCCTAAGAAGATAGAT  
AAATTTAATGGATGGAATGATGCCTAGCTATTTCAAGTTAGGGCCCATCGTATGTTGTTACTTTACTTGTCTCCCAT  
ATCTTACAATTTTTTTTTTATTTATACCACGAGGTTTCAGAACTAGACCTAATTTATGTGGATCCGAAGTCAGATTT  
AGTTTCTTCTTTTGGAAACACTACTCATCCCAAG

>AtSRS4

GTCCATGAGATGAGTACTAGTGAGTAGTGATGAACATAGAGTTAGAGAAAAAGAGATAAAGAAGAAGATAGAAAAAT  
ATAGAAGAGGTATAGACAAAGGGAGAAACGTTCTTCGTGAGAGTCAAACGAACAGAAGAACCAGAGGCATTTTGTCT  
TTCATATTTGATTCACAAAGCTCACATCTAAAGCTCTCTCTCTCTCTTCTTACTCTTCTCGCTTTTGTCCACCACAAC  
AACTAGTCATGCAATGAAAGCACACAATATGACCGGAGAGGAAGTCACTAAAAGAAAATAGGCAACGCGGCCGGA

GTTATCAAAAGCTCAAGACTTGATGGTAACTAGGATTTTTAAATTTATGGATATTGTAAATTCAGATTAGGGTTAGA  
GAAGGAGCTATGTGAATTTTGAATGGCTGGGACAGGATCATCAAGAAACAACGAAGAAGACAATCAACAAAAC  
ACAAATTTGGGTTTGGTACAAACACACCAATAATAACCTAAGTACGAGCCACAACAATCAGATATGGCAGCAGCCAAG  
CCTCGATCTATATCCGGGTCAGATCGACGTCTGTGATATGACCACGTCATCGAGATCTCTAACGATAAGCTGTCAAGA  
GTGTGGAAACCAAGCCAAGAAAGGGTGCACGCACGGGCGGTGTAGAATTGCTGCAAGAGTAACGGACTCCACTGT  
CCCACCCACGTGAGGAGCACGTGGATCCCCATTGCCAAACGCCGTGAGCGGCAGCAGCAGCTACAGACGCCAACCTC  
CAACCAACCCGGCGGTAGCGGCAGAGTTGGGAAGTATAGAGACATTAATCAACATGCTACTTTAGACTCATCAGGTT  
TGTTTTAGTAGTTTTTTCATTGTTGTTGCCAATAAATCTTTCTTTTTTACATGATAATGCATCAGTTTTACTTTCGAT  
CAAATATCATTTTCAAATTTGCAATAAGCAATCTAAGAAATGAAAAATGAAATTCATTTCAAATGATGAAACTA  
TTAAATATTAATGTAAGAAGCTAAGTAAAATAAAGAACAACAAAAATTTGTGTTTGAATAATGAACATAGTTTTGTGT  
TAGGATTTGATAAATGTTTGTGTTGTAAGTTTTGGCCCTAACTTTGTGTAACTTTGTAGGGTTAGAGATGGGAGAG  
ACAAGATTTCCAGATGAAGTGAGCTCGGATGCACTTTTCCGATGCGTCAGAATGAGTGGTACCGATGATGGAGAGG  
GCCAATACGCATACCAAACGACGGTGGGCATAGCTGGTCATCTCTTTAAAGGAATTCTCTATAACCAAGGTCCAGAA  
AACAAGTCCATGCGCAGTACACAATTTCTACGAGAACCACCAAGATCTTAATTTTTTTTATATCTCTTTATTTTTG  
TCGTATGCAATAATCTCTATTAATAACTTTGTTGATTCAAGATTATCCAAAACCTCAATACTTTACAGATGAAGTAACT  
CGGTAAATCGTTATGTTAGAGAGAATCTGTTTAAACATTTGTTTATAATTTTAAAGAAGGTGGATAAATGAACATA

>AtSRS5

CAACAATAGTTTTGAGTGATATTTATGTGATGGGGATTCACTCAAACCTGGAAGATAACTGTAGTGAAGTGCCCAAAG  
CAAAAGATCTTCATGGGACTCTCTATGTCTTAAAAACTTTTTTCTCTCTCTCTCTCTCTTAATCCACCGAGTAAAT  
CCAGCAAACCTTCCACTTTCAGAGATCAAACCTTGAAGTATCTTAAGTGATGAAGAAAAGACTAATTCATGGCGGCGT  
TTGCAGTTTCTTAAGCTTCCCTCATCATCTACCGTCAATCTTTATAGCAAAGAAAAGGAAATCAAATCAAGATTTACC  
CTTTTCTTTGATTTCTCTTTGTGGTGTGTTGGGTGTGATGTTGATTACCCTGCGGAAAGAAAATGGCAGGGTTC  
TTCTATCTAGGAGGGAGAGACAACAACAGCAACAACAAGCAAGATCATCATCAAGTAGACAAGGATCATCATC  
ATCAAGACAAGAGCAATTATCTTTATCTTTACAAAAGCAGAGATCTATAATAACAACAAGGGTTTCGAGATTTGGCCT  
CCGCAATACTTCCAACAACAAGAACATCAACAACAACAACAGCAACAACATGCCCTCAGCTCCTGCAAACCTCT  
ACTCATTTGGAATGGTTCCCTAGCGGAAGCAGCAGCAACAACAACAATAACCGTAGCCGGAGTTTATACTTCAACGTA  
GTCTCCGATCATGAGCCGGGAGGGTTCACGGTGACGAGACAAGGAGGTATGAATTTGTCAAGATTGTGGAAATCAAG  
CTAAGAAAAGATTGTCTCATATGAGATGTAGAACTTGTGTAAAAGCCGAGGCTTTCATTGTCAAACCTCACGTTAA  
GAGCACTTGGGTTCCCTGCTGCTAAACGTCGTGAGCGTTTAGCCCAACTCGCTTCCCTGCAGCACCCTCAGCCTCCA  
GCCGTGAAACGCAAAACGCCAAACGCCTTCGAGAAGCTAGTGGTGGTGATAATAATGATGATAAAGACCATAGTGG  
TGGTGGTGGATCGGCTCTTGCTAATACCCGTGTGGTGAATGCTAATTCTAATTCAGGTAAAATTTCTTGATGATATTG  
AATTAGCTTTCAAGATTGATTAATTTTTCATGAAAAAGTGTCAAAGTTTTAATTTATGAATGTTTGTGGAGAAGTAC  
AACATCATTTGCGTGTGAATGAGGATGTCCGCCGATATTGCTGCTTTATTTATACAAGTTACTGTTCCCTTAGTAAA  
CCTGACGACATAAAAGGATCTAACCAAGATCGATTTTCATGTAAAAACAATGCAATAAAGATTCGTTTTTGTAGATAT  
GAAATGGGAGCTACGCTTTATAATCAACAACATGTTATACTAAAAGGGGCTAAAAACAATCTCATGTTTATATTTT  
GGTGATCTTATAATCATTAATAAAAAAATTAGGGTTGGAGGTGAGTCAACACTTACCACCGGAGGTTAACTCACCGG  
CGATATTCGGTGCCTTAGAGTGAGCTCAATAGAAGAGGATGAAGATGATCAAGCATATGCTTACCAAACGGCTGTG  
AACATTGGAGGCCATATCTTCAAAGGCATTCTCTATGACCAAGGACCAGAACATCAAGATAATCATCACCTTAACCT  
ACTTGCTTCCACTGCAACCACCACCAATGTGGAGGAGACCGCCACTAAGACTGTCACCGGTAACAATAATAATGGAT  
TAATGCTTGATCCTTCTTCGCTTTACCCAGCTCAACTCAACTCCTTCATCGCGGGTACGCCATTCTTCACACCTCCG  
AGGTCTTGATCAGATTCTGATATCAGTTATTGATTATTGTTAATCTTTAAACGTTATAATAAAGAGGATTTCTTT  
TGTTTTTGTTTTTGTTTTCGTTTTATCTATTTTTGAAACTTCGTGCAATTTGGAAAAACACCCCTTACCTAGGTTGT  
TACTTAGTGGTGAATTAACATGCATATTGTACGTACTTTTAAAGAAAAGAAGATAGTGTTCATGTTTCAAAGATTAATC  
TTTTGCTTTATTTTTGTTTCATTAGGATCGATCTCTG

>AtSRS6

GCTTTCCCAATGAAGTGGACCACTCCACTTGGAAAGATAATTATTTTCATTTTCTGCAGAACATTTTAAACCATTACA  
TGTGACCACAAAACCTCTGTCAAAACCCCAAATATTA AAAA ACTTATGTTTATTGCTCTCTCTCTGTTTCTCACTA  
CTCTTACTAGACTCCTCCATAGCTAAGCTCCACCTACTAGATTAGCCTCCACGCGCTTTTATTTACTACTGCCACA  
GTGGCAAATCCACCTTCTTCCCTCTCATGGCCACCACAACCATCATCATCTTCAACACCTTTTCGCCGCGTCTCAAT  
CCCACCTGATCACTCTTCTCCTCCGTCGCCGCGTGGAAATCAGTACTACTCCAGACTACATGTTAGGTCTTCGAAA  
CATCATTCTCTTATCTCCACCACCGACGCAGATAACACGGCCATCTCTTCCCTCCGGTAAACTTCGCCGCGGTGGAAG  
ACAACAACACAGTTGGAGAGAAAAGTATGCAGAGACTGTGGAACAGAGCAAAGAAAGAGTGTGTTGTTGAAAAGAT  
GTAGA AACTGTTGTA AAGCAGAGGATACA AACTGTGTC ACTCACGTGAAGAGCACGTGGATTCTTCTTCTGCAAC  
TCGTTCTTCATCTTCTCCTTCTGAGAGGAAGAAGAAGCTCAAAATCGATAAACAGAGTTC C C C T A A T G T C T C G C T A C  
TTCGACAACCACTTCTCGTCAAGGTAATGAATCTTGAACTAGAATTGAACAAAACCTTTTTTAATCTGAATTTT  
GCGTTTTTGTGTGAAAATTGCAGAGAGAGGCTTCAGAGAGGGGTTACCGGGGAAAATTGAAGCTCCGGCGGTTT  
TTAAACGGACGAGATAACAGCGATAAGCAACAACGAGCAAGCAGAGATTGGTTATCAAGCAACAGTAACTATAAG  
TGGTCAATCTTCAAAGGCTTCTTCTTACTATGGTGTGATCATAACAAAGCTTTTCCATGTCTTCTCAAAAAT  
GATGGAACTACTTCATAGGATTCTGTGTATAAAGTTTCTCTGTTTTCATCTCAAAGTTTTTGTCTTTTTTAACTA  
AGTGGATTTTATATATATTCGACATTAAGGGACAAAACATTAATGGGCCATTCCATTCCTAAAGCTTGCTATTTTT  
ACTTTTATATATGTATACAGAGAAAATAGATGTTTTTGTAGCAAGTGAGGTTGTTTCCAGGATCAACGCCAAGTTGA  
CGACAATAATCCGTGTAGTAACGAACTCTAGCTTGAACGGTGGCTGTGTTGGCCCCGTCACACTCCAAAGCACCGTT  
AATGGCACGGATTGTTGCACCAAAACCTTGAGAGATAACAGGCTGAACCCTATGGTCCAGTACCACAAGGCGGTT  
TTGAAGGATATGACTGGATCCGTGGCTACTGTTTCCGGTGCATTACAGGCCGTCGAAACCAATTGCTGTCCCGGCTGG  
CCCGTAGTTGAAATTCCAAGAGAGTTGGATCGGTCCGCGGCCGTAGTAGCCTTTGTTAGGATTGCATGGATATTGTG  
TTGCATTCTCGTCGCAGTAATCCTTTGAGGCTCCGTCTATCTTCTATGTAGCAGAAATCT

>AtSRS7

ATTCATTGAAACTGGAAGACA AACTGTAGAGAAAGTGCCCCATAGAAGAAGATCTTCATAGTACTCTCCATCTCTTTA  
CTCTCCTTCTCTTCTCTCTCTATCTCTCTATTTCTCTCTCTCTCTCTCACCACAGAGAAAACCAGCAGTA  
GTAGCAGTAAATTGCTTGAGTCTTGATGACAGATCGACAATGTCTTAAATGATGAAGAGAAAAGAAGGAAAGCAA  
TAAACCTTGGCGGCGTTTGCAGCAGTTTCTTAAATTTCCCTCACCATCATTACTCTCTCATCTGCTCCCAAATCTGCT  
CCTTTTAAATACCAAACACATCTCCAAGCCTAGCTAGAAAATTAATGTGATAGAGAGCAAAAAGAAAAGGTGAACAC  
AAATCCCCAAAATAATTCATCCACAAACCCCAAAAAGTCTCATAAATCCTCTTTCTTTCTTTTTGTTTGTGTTTT  
GTGTTGGGGAAGTAGAAAAAATGGCTGGATTGTTCTATCTAGGAGGGAGAGATCACAACAACAAGATCATCATC  
AAGAAAAGGATCATAATGAAGACAAGAGCAACAATTATCTCTATCTATACAAAGACGAGATCTACAACAACAACA  
GGGTTTTGAGATTTTCCCTCCTCAATATTTTCAACAACAACAGCAACAAAATCATGCGGCTGCTCCAACA AATCTC  
TACTCTTTTGGTATGGTCCCGAGTGGTGGTAACATAACAATAACCGGAGTACTAATCGGAGTTTGTACTTCAACGT  
CGTCTCCGATCATGAGCCGGTGAAGATCCTCAACGGGAGGTTTACGGTAACGAGACAAGGGAACATGAATTGCCAA  
GACTGTGGGAATCAAGCCAAGAAAGATTGCTCTCATATGAGATGTCGTA C T T G T T G T A A G A G C C G A G G G T T G A T T  
GCCAAACACACGTGAAGAGCACGTGGGTCTCGGCTGCTAAACGCCGTGAGAGACAGGCTCAGTTAGCTGTTTTGCC  
AGCTAAGCGTATAAGAGACGCTAACTCAAGGGTGGTGGGGATGACGATGATGATGACAAAGAGGACGAGAAAAAT  
GACAGTTGTGGTGGTGGCTCGGCTCTTGCTTGCACCCGTGTGGTTAATGCTAGTTCTT C A G G T A T G A C G A T G A G T T T  
TCAATTAATTAACATAGAGAAAAAATTTCAACAAATCTAGAAAGGATTTAAAAACAAATTTATGTGAAGATCTGGT  
TATGAATGTTTTGTCAAGAAAGCAACAATATGATTTGATTTGTAATATATGTCCACCGGATTTTGTCTCTTTCTTTT  
TGCTGTTTTGATTTTGTGTAATAAATGTCCAACAAAATGATTTTAGTCACTGTTCTATGGTAAACCTGACGACAC  
AAAGGGTTAGTCGATTTTTATTTCAATATATGATGTA AAAAATAAACAATGGTTAATTATGT CATGTGTTTTAAAGA  
TTTTGATTATTGGATTCACGAACCAAAACGTTTTTTGAATTTTATAGTAATCTTTGGTTTTATGAAATTAGGGTTAG  
AGACTAGTCACTTACCACCGGAGATAAGTTC C C C G G C T G T T T C C G G T G A T G A G A G T C A G C T C A A T C G A C G A T G A A  
GACGAAGAGTATGCTTATCAAACGGCTGTTAGCATTGGAGGACACGTGTTCAAAGGCATTTCTTACGACCAAGGTC  
CATCGTCAGATCACCACCGTTACAGCTCAAGCCTCAATGGCGAAAACCTCTCATCAACACCATCTTAACTCATGGAC  
TCAACTCCTTCAGCCGCAACTACAAACGCCGTGACCGCGTTAAACTAACAACGGATCTATTGACCCTTCTTCCCT  
TTACTACTGCGGTGGCAACTCCGTTCAACGCCTTTGTGCGCGGTGGTACGCCTTTCTTTGCATCTTCTAGGTGTTGAG

ATTTAAACATCTGAAGATGTTAAATCTTTTAAATTACGTTTGTGATTAATTATAACTACTCTTATAACTACCAGAGA  
TCTATCTACGAGTACGAGAGATAATTTATTTGAGTATTTTTATTGTTGTCGGACAATATGGTGACTGTTTCGTACCTAG  
CTAGGGTTTGTGACTGATTAACATGCACATCGTACGTTTTAGAGATAAATGAGATATTATCATTAAGTTTTTTTTG  
GGATAAACGAGATATTAATTAATGTCAGAGTTTCAAATTTTGATC

>AtSRS8

TTGGTTTGTGAGTAGAAGGAAGAGCAAATGATTGGTGGGATATCAGGAATGATGGATATGAACATGGAGAAGATTT  
TTGAGGATTCAGTTCCTTGTAGGGTTCGTGCTAAACGTGGTTGTGCTACTCATCCTCGTAGCATTGCTGAACGGGTA  
TTTTCTCTAAAGTTTGTGCTAGATGATTTGCAGTACCAATTCTGTTTCTATCTCATCTTGTTTTGGCCCTTAAGCTT  
TTCTCTGTTTCAATTTTGTAGGTGAGAAGAACGTGAATAAGTGATCGGATTAGGAGGCTGCGATGATGATGATTCGT  
AGTGGTGGCAGCGGAGGAAGTGGTGGTGTGAGCTGTCAAGACTTTGGGAATCAAGCGAAGAAAGATTGCTCTCAC  
ATGAGGTGTAGAACTTGTGTAAGAGCCGTGGCTTCGAGTGTCTACTCACGTGAGAAGCACGTGGGTTCCTGCTA  
CTAAACGCCGTGAGAGACAACAACAATTAGCTACGGTTCAGCCTCAAACCTCAGCTGCCTCGCGGTGAGAGCGTTCC  
TAAACGCCACCGTGAGAATTTACCGGCAACTTCATCGTCTCTAGTCTGCACTCGCATACTTTTCATTCAGGTATAT  
GTCACTGCAATGTGAAATATTTATTTATGTGTATATATATATGTTTATTATATATGTCGTGAGATATATAATGAAA  
TGCAAGCAGCATTTTTATAATTTATATAAGTAACGAATTGGGATCAGCTTCTAGAGTAAAAAACGAAAAACCCTATT  
TTGAATTTATAAGTTTTCCAAAAATAAGTTTTGTATTTTCTTAAAAGTTTGTGCTAGATGATTTGCAGTACCAATT  
CTATTTTCTATCTCATCTTGTGTTTTGTCATTAAGCTTTTCTCTATTCATTTTGTAGGTGAATAAGTGATCGGATTA  
GGAGGCTGCAAGAGCTTGTTCCTAACATGGATAAGGTACATTTCTTTTACAAGGCAGATTGGTTTTAAAGTTTTTCT  
TGAAGTAAAAATATTAGAATTAG

## Coding Sequences

>AtSHI

ATGGCAGGATTTTTCTCGTTAGGACACGGCGGAGGAGGAAACACTCCAGACAACCACAGAACAACACTAATAATC  
CTTCTTCATCGGGAACAGAATCTTGGCTTTGGTGCAGAAACCCTAACTCTAACGCTGACGGTGGAGAAGCTGGTCC  
TTCTTACAAAGGAACCCTTGAGCTATGGCAACACCCAAACAATCAAGAAATCATTTTCCAGCAGCAGCAGCAACAG  
CAACAAAGGCTGGATCTTTACACTTCCGCTGCGGGTTTAGGTGTTGGACCGAGCAACCGGAGCTTAATTGAAACTT  
CCGGCGGTGCGTTGATGATGATGAGAAGCGGTAGCGGTAGCGGCGGACCAAGCTGCCAGGATTGTGGGAATCAATC  
TAAGAAAGACTGCTCTCACATGAGATGTAGGACTTGCTGCAAGAGCCGTGGCCTTGACTGTCCCACTCACGTGAAG  
AGCACGTGGGTTCCTGCCGCTAAACGCCGAGAACGCCAGCAGCAGCTTCTACCGGTCAGCAACCGCAGCAACTGG  
GAGGGAGCGTCCCTAAACGACAGAGAGCGTATCCCGCGGAGATCGACTTCCATGGCCTACACTCGTATACTTCT  
AACAACACTTCAGGGTTGGAGGTTGGGAATTTTCCGCCGGAAGTTAGCTCGTCGGCAGTTTTTCCGGTGGTGGCGT  
TGAGTTCGGTAGATGATGAAGAAGAAGAGTATGCATATAAAACAGCTGTGAGTATAGGCGGTCACGTCTTCAAAGG  
TGTTCTCTACGATCAAGGCCCGCCGAGAGAAGCTCCTCGGGCGGTGGATCTCAGCCGTTGAATCTCATAACCGCAG  
GCCCATCGGCCTCATCATCAAGCCCAAACGTGAGCTGCAACAATGGAGTCGTTGGCTCCACTTCAGATCATTTATATC  
GATCCTGCCTCACTTAATTATCTACTCCCATTAACACTTTCATGACTGGTACGCACTTCTTCTCCAACCTCAAGATCT  
TGA

>AtSTY1

ATGGCGGGTTTTTCTCGCTAGACGGTGGTGGAGGAGGAGGCGGAGGTGGAGGTAACAACCAAGAAGATCACCGGA  
GCAACACAAATCCTCCTCCGCTGTATCAGAAGCTTGGCTCTGGTATAGAAACCCTAACGTTAACGCAAACGCAAAC  
ACAAACGTTAACGCAAACGCTCCTTCTTCGTCAAACGCTGCTTTAGGAACACTTGAGTTATGGCAAAACCAATC  
AGCAAGAGATCATGTTTACGATCAGCAACATCAGCAAAGGTTGGATCTTTACTCTTCCGCCGAGGTTTAGGTGT  
TGGACCAAGTAATCATAACCAATTCGATATCTCCGGCGAAACTTCAACCGCCGGCGCCGGAAGAGCTGCGGCGATGA  
TGATGATTCGTAGTGGTGGTAGCGGAGGAGGAAGTGGTGGTGTGAGCTGTCAAGACTGTGGGAATCAAGCGAAGAA  
AGATTGTTCTCACATGAGGTGTAGAACTTGTGTAAGCCGTGGCTTCGAGTGTCTACTCACGTGAGAAGCACG  
TGGGTCCCTGCTGCTAAACGCCGTGAGAGACAACAGCAATTAGCTACGGTCCAGCCTCAAACCTCAGCTGCCTCGCGG

TGAGAGCGTTCTAAACGCCACCGTGAAAATTTACCGGCAACTTCATCGTCTCTTGTCTGCACTCGCATACTTCTC  
ATTCAGGGCTAGAAGTTGGCAATTTCCCGGCGGAGGTGAGTTCATCGGCGGTGTTAGGTGCGTGCGTGAGCTC  
AGTAGAAGATGGAGAAGAAGAGTTTGCTTACCAAACAGCTGTAAGCATTGGTGGTCACATTTTCAAAGGCATTTTA  
TACGACCTCGGTCTTGAAAGTAGTGGTGGCGGAGGCTACAACGTTGTGCCGCCGGTGAGAGCTCCTCTGGTGGT  
GTGGAGCTCAACAGCTGAATCTCATAACAGCTGGCTCTGTAACCGTTGCTACCGCTTCTTCTCTACTCCAAACCTC  
GGTGGTATTGGCAGCTCATCAGCCGCGGCAGCCACGTACATTGATCCAGCCGCTCTTTATCCAACCTCCGATCAATAC  
ATTCATGGCCGGTACACAATTCTTTCCCAACCCAAGATCATGA

>AtSTY2

ATGGCTGGGATATTCTCATTAGGAGGTAACAACAACAACAACGGAGACGAAGAAGAAGAAAATCAACAACAACAA  
AAGACAAATTGGGTTTGGTATAGATCAAACGCAAACACCAATAATATCAACCCAAGCTCGAGCCAACAAGTATGGC  
AGATTCCACCAGAGCAGATGCTCATGCATCATCATTACATCCACAACAACAAGCTTAGATCTTTATCCAGGTCA  
CAGATCGACGTCTCTGATTTAGCCACTTCATCAAGATCCATCACCATTAGCTGTCGGGACTGTGGGAACCAAGCCAA  
GAAAGACTGCACTCATATGCGTTGCAGGACTTGCTGTAAAAGCCGTGGATTTCGATTGTTCCACTCACGTCAGGAGC  
ACGTGGATCCCCGTTGCGAGGCGCCGCGAGAGACAACAGCAGCTTCATATGTCCACATCTGGAGGTGGCGGCGGAA  
GCGGTAGTGGCGGTGCTGGAGGAGGCGGTTTCGAGTATCCAAAACGCCATAGGGACCCTACTCTTCCAGGAACATCC  
TCCTCTTCTCGCTTGCCATCCCACTCAGCAGGGTTAGAAATGGGGGAGGCAAGTTTTCCGGGGGAAGTGAGCTCAG  
ATGCGCTTTTTCGGTGTGTTAAAATGAGTGGCGTAGATGATGGAGGAGATGGTCAGTACGCTTATCAAACGACGGT  
CAATATTGGAGGTCATCTCTTCAAAGGAATTCTGTATGACCAAGGCCCTGAAAGCAGCTACATGAGTGGCGGTAGTG  
GCGGAAGCGATCATCAGAGCTCATCCGAGGAGGCGGAGGAGGAGGACATCCGTTTAATCCTCCAGTTGTGACCGA  
CGGTGGCGGAGGAGTATCATCGCCATGTTTGTAGATCCAAATTCTGGTGGTTACTATTCAAGTAACATGACGACTA  
GTGTGTTTCATGCCACCAGGTACGCAATTCTATCAAAAATCCACCAAGATCTTGA

>AtLRP1

ATGGGCATGGTTGGTCTAAGAGATGTATTCCCTTGTGCTCCGGCTTATCACCACCAGAACGCCGGAGTGATATCTGG  
ATCCGATCATATGAACAGTAATGCAGCTGCGGCGGCGGCGCTCGGTGTCGGAGTGATTCCCTCTACTCACGGCGGGTA  
CACCGCAGCAAACGTTGGAAGACTCCGACATTAACCTCCCTCGGAAACAACCGGAGATGGCAGAATAACAACAACAA  
CCACGAAACGCAGTATCTTCACTTCAAGAGTACTAACCAGACAACGGTCGGAACGAGCTCGAACAACCTCGGGGTCT  
GGCTCAGGCGCATCAGGAACCGCCACGTGTCAAGACTGTGGAAATCAGGCGAAGAAAGAGTGTAAAGCAGAGGCGGT  
GTAGGACTTGCTGCAAGAGCCGTGGCTTTGATTGTTCTACTCACGTGAAGAGCACGTGGGTCTCTGCTGCTCGGCG  
GAGAGAGAGGCAGGTCATGCCTACCGGCGCTAATCCAACGGCTGGCTCGTCTCTTTCGACCTCCTCCGGGACGAAGA  
AGCCGAGGATCGTAGGGTCTCAACAACAACAACAACAAGCCACTTCTCATACTTCAACTTCTAACACACCACCT  
CAAAGTTTTCGAGACCAGCTCCAGCCGACAAGACGGAGGAGGGTCAAGGGAAGCATGGCCAGGGCAGGTTAGGGCA  
GCGGCGGTGTTCAAGTGTGTTAGAGTAACGGCAGTGGAGGACGGGGATGATGAGTACGCGTACCAAGCGGTGGTGA  
AAATCGGCGGCCATGTCTTTAAAGGATCTTGTACGATCAAGGGCTTGAACCAAAAAGAAGTTTTCTTAGTATGTC  
GGATTTGCATTTAGGTGGTTTCAGCCAATAACCAACGGAGTTTCTGCTCGGCGCCTATTCTCGACCCGCTAATG  
TTGTTTATGGTGGTGGTGGAGGTTTCAGGCGGTGGGTTTTACAGTTAA

>AtSRS3

ATGATGATGATAATGGGGAGAAAATGTGAAGATTGTGGGAATCAAGCGAAGAAAGATTGTGTGTACATGAGATGCA  
GAACTTGCTGCAAATCCAAAGCCTTCCATTGCCAACTCACATCAAGAGCACTTGGGTTCTGCCTATAGAAGATCT  
CATCACAACACCAATCGCAACCGCTCTCTACTAGTATCCAAAAGGTGTACAAATCCACACTACTCCTGGACATTT  
TCCGGCAGAGTTGAGTTCCCTAGCAGATTTCCGATGCGTAAAAGTGAGTTCAATCGATGATGGAAAAGAGCAATAT  
GCTTATCAGACCAGGTGAACATTGGAGGACATGTTTTAGAGGGATTCTTACGATCAAGGACTCCACAAAGTGA  
TGGTAGATCATCATTATAAAAAATAGTAATAATCATCAAGAGTTACTTACTCCTTCAACTTCTTCATGTCCCTTGA  
AGATCACAAGTCCTTTTACCGATTTTCATGTTCCGGTACCCGATTTTCTTCGGTCCCTAAGAAGATAG

>AtSRS4

ATGTCGAATTTTGAATGGCTGGGACAGGATCATCAAGAAACAACGAAGAAGACAATCAACAAAACACAAATTGG  
GTTTGGTACAAACACACCAATAATAACCTAAGTACGAGCCACAACAATCAGATATGGCAGCAGCCAAGCCTCGATCT  
ATATCCGGGTCAGATCGACGTCTGTGATATGACCACGTTCATCGAGATCTCTAACGATAAGCTGTCAAGAGTGTGGAA  
ACCAAGCCAAGAAAGGGTGCACGCACGGGGGTGTAGAACTTGTGCAAGAGTAACGGACTCCACTGTCCCACCCA  
CGTGAGGAGCACGTGGATCCCCATTGCCAAACGCCGTGAGCGGCAGCAGCAGCTACAGACGCCAACCTCCAACCCA  
ACCGCGGTAGCGGCAGAGTTGGGAAGTATAGAGACATTAATCAACATGCTACTTTAGACTCATCAGGGTTAGAGAT  
GGGAGAGACAAGATTTCCAGATGAAGTGAGCTCGGATGCACTTTTCCGATGCGTCAGAATGAGTGGTACCGATGAT  
GGAGAGGGCCAATACGCATACCAAACGACGGTGGGCATAGCTGGTCATCTCTTTAAAGGAATTCTCTATAACCAAGG  
TCCAGAAAACAAGTCCATGCGCAGTACACAATTCTACGAGAACCCACCAAGATCTTAA

>AtSRS5

ATGGCAGGGTTCTTCTATCTAGGAGGGAGAGACAACAACAGCAACAACAACAAGCAAGATCATCATCAAGTAGACA  
AGGATCATCATCATCAAGACAAGAGCAATTATCTTTATCTTTACAAAGACGAGATCTATAATAACAACAAGGGTTTC  
GAGATTTGGCCTCCGCAATACTTCCAACAACAAGAACATCAACAACAACAACAACAGCAACAACATGCCTCAGCTC  
CTGCAAACCTTCTACTCATTGGAATGGTTCTAGCGGAAGCAGCAGCAACAACAACAATAACCGTAGCCGGAGTTT  
ATACTTCAACGTAGTCTCCGATCATGAGCCGGGAGGGTTCACGGTGACGAGACAAGGAGGTATGAATTGTCAAGAT  
TGTGGAAATCAAGCTAAGAAAGATTGTCCTCATATGAGATGTAGAACTTGTGTAAAAGCCGAGGCTTTCATTGTC  
AAACTCACGTTAAGAGCACTTGGGTTCCTGCTGCTAAACGTCGTGAGCGTTTAGCCCAACTCGCTTCTTGCAGCAC  
CACTCAGCCTCCAGCCGTGAAACGCAAAACGCCAAACGCCCTTCGAGAAGCTAGTGGTGGTGATAATAATGATGATA  
AAGACCATAGTGGTGGTGGTGGATCGGCTCTTGCTAATACCGTGTGGTGAATGCTAATTCTAATTCAGGGTTGGAG  
GTGAGTCAACACTTACCACCGGAGGTTAACTCACCGCGATATTCCGGTGCCTTAGAGTGAGCTCAATAGAAGAGGA  
TGAAGATGATCAAGCATATGCTTACCAAACGGCTGTGAACATTGGAGGCCATATCTTCAAAGGCATTCTCTATGACC  
AAGGACCAGAACATCAAGATAATCATCACCTAACCTACTTGCTTCCACTGCAACCACCACCAATGTGGAGGAGACC  
GCCACTAAGACTGTCACCGGTAACAATAAATGGATTAATGCTTGATCCTTCTTCGCTTTACCCAGCTCAACTCAA  
CTCCTTCATCGCGGGTACGCCATTCTTTCACACCTCCGAGGTCTTGA

>AtSRS6

ATGTTAGGTCTTCGAAACATCATTTCTTATCTCCACCACCGACGCAGATAACACGGCCATCTTCTCCTCCGGTAAA  
CTTCCGCGCGGTGGAAGACAACAACACAGTTGGAGAGAAAGTATGCAGAGACTGTGGAAACAGAGCAAAGAAAGA  
GTGTTTGTTCGAAAGATGTAGAACTTGTGTAAAAGCAGAGGATACAACACTGTGTCACCTCACGTGAAGAGCACGTGG  
ATTCCTTCTTCGCAACTCGTTCTTCATCTTCTCCTTCTGAGAGGAAGAAGAAGCTCAAAATCGATAAACAGAGTT  
CCCCTAATGTCTCGCTACTTCCGACAACCACTTCTCGTCAAGAGAGAGGCTTCAGAGAGGGGTTACCGGGGAAAAT  
TGAAGCTCCGGCGGTTTTTAAACGGACGAGAGTAACAGCGATAAGCAACAACGAGCAAGCAGAGATTGGTTATCAA  
GCAACAGTAACTATAAGTGGTCATATCTTCAAAGGCTTCTTTCATTACTATGGTGTGATCATAACAAAGCTTTTCC  
ATGTCTTTCTCAAAAATGA

>AtSRS7

ATGGCTGGATTGTTCTATCTAGGAGGGAGAGATCACAACAACAAGATCATCATCAAGAAAAGGATCATAATGAAG  
ACAAGAGCAACAATTATCTCTATCTATACAAAGACGAGATCTACAACAACAACAAGGGTTTTGAGATTTTCCCTCCT  
CAATATTTTCAACAACAACAGCAACAAAATCATGCGGCTGCTCCAACAATCTCTACTCTTTTGGTATGGTCCCGAG  
TGGTGGTAACATAAACAATAACCGGAGTACTAATCGGAGTTTGTACTTCAACGTCGTCTCCGATCATGAGCCGGTGA  
GATCCTCAACGGGAGGGTTTACGGTAACGAGACAAGGGAACATGAATTGCCAAGACTGTGGGAATCAAGCCAAGAA  
AGATTGTCTCATATGAGATGTCGTAATTGTTGTAAGAGCCGAGGGTTTTGATTGCCAAACACACGTGAAGAGCACG

TGGGTCTCGGCTGCTAAACGCCGTGAGAGACAGGCTCAGTTAGCTGTTTTGCCAGCTAAGCGTATAAGAGACGCTA  
ACTCAAGGGGTGGTGGGGATGACGATGATGATGACAAAGAGGACGAGAAAAATGACAGTTGTGGTGGTGGCTCGG  
CTCTTGCTTGACCCGTGTGGTTAATGCTAGTTCTTCAGGGTTAGAGACTAGTCACTTACCACCGGAGATAAGTTCC  
CCGGCTGTTTTCCGGTGTATGAGAGTCAGCTCAATCGACGATGAAGACGAAGAGTATGCTTATCAAACGGCTGTTAG  
CATTGGAGGACACGTGTTCAAAGGCATTCTCTACGACCAAGGTCCATCGTCAGATCACCACCGTTACAGCTCAAGCC  
TCAATGGCGAAACCTCTCATCAACACCATCTTAACCTCATGGACTCAACTCCTTCAGCCGCAACTACAAACGCCGTG  
ACCGCCGTTAAACTAACAACGGATCTATTGACCCTTCTTCCCTTTACTACTGCGGTGGCAACTCCGTTCAACGCCTT  
TGTCGCCGGTGGTACGCCCTTCTTTGCATCTTCTAGGTGTTGA

>AtSRS8

ATGGATATGAACATGGAGAAGATTTTTGAGGATTCAGTTCCTTGTAGGGTTCGTGCTAAACGTGGTTGTGCTACTC  
ATCCTCGTAGCATTGCTGAACGGGCTGCGATGATGATGATTTCGTAGTGGTGGCAGCGGAGGAAGTGGTGGTGTGAG  
CTGTCAAGACTTTGGGAATCAAGCGAAGAAAGATTGCTCTCACATGAGGTGTAGAACTTGTGTGAAGAGCCGTGGC  
TTCGAGTGTCTACTCACGTGAGAAGCACGTGGGTTCCTGCTACTAAACGCCGTGAGAGACAACAACAATTAGCTAC  
GGTTCAGCCTCAAACCTCAGCTGCCTCGCGGTGAGAGCGTTCCTAAACGCCACCGTGAGAATTTACCGGCAACTTCAT  
CGTCTCTAGTCTGCACTCGCATACCTTTTCATTCAGGTATATGTCACTGCAATGTGAAATATTTATTTATGTGTATAT  
ATATATGTTTATTATTATATGGTCGTGAGATATATAATGAAATGCAAGCAGCATTTTTTATAA
