# Supplementary material
Source: Research Square preprint supplement (doi:10.21203/rs.3.rs-9439008/v1)
Supplement: Supplementary file 2 [file e77f0eef69cb3c0d6687184b.xlsx]

## Sheet: SP1 Cis Acting Elements
Cis Regulatory Elements of SRS genes in Arabidopsis
AtSHI	AT5G66350	G-box	TAAACGTG	102	8	+	Brassica oleracea	cis-acting regulatory element involved in light responsiveness
AtSHI	AT5G66350	G-box	CACGTG	137	6	+	Arabidopsis thaliana	cis-acting regulatory element involved in light responsiveness
AtSHI	AT5G66350	G-box	CACGTG	1113	6	-	Arabidopsis thaliana	cis-acting regulatory element involved in light responsiveness
AtSHI	AT5G66350	G-box	CACGTG	1124	6	-	Arabidopsis thaliana	cis-acting regulatory element involved in light responsiveness
AtSHI	AT5G66350	Box 4	ATTAAT	188	6	+	Petroselinum crispum	part of a conserved DNA module involved in light responsiveness
AtSHI	AT5G66350	MBS	CAACTG	1191	6	+	Arabidopsis thaliana	MYB binding site involved in drought-inducibility
AtSHI	AT5G66350	TGACG-motif	TGACG	797	5	+	Hordeum vulgare	cis-acting regulatory element involved in the MeJA-responsiveness
AtSHI	AT5G66350	MYC	CATGTG	1062	6	-	Arabidopsis thaliana
AtSHI	AT5G66350	MYC	CAATTG	1372	6	-	Arabidopsis thaliana
AtSHI	AT5G66350	Myb	CAACTG	1191	6	+	Arabidopsis thaliana
AtSHI	AT5G66350	CGTCA-motif	CGTCA	797	5	-	Hordeum vulgare	cis-acting regulatory element involved in the MeJA-responsiveness
AtSHI	AT5G66350	Myc	TCTCTTA	251	7	-	Arabidopsis thaliana
AtSHI	AT5G66350	ERE	ATTTCATA	1290	8	+	Nicotiana glutinos
AtSHI	AT5G66350	CCAAT-box	CAACGG	148	6	+	Hordeum vulgare	MYBHv1 binding site
AtSHI	AT5G66350	MYB	CAACCA	716	6	+	Arabidopsis thaliana
AtSHI	AT5G66350	MYB	CAACAG	888	6	+	Arabidopsis thaliana
AtSHI	AT5G66350	MYB	TAACCA	1309	6	-	Arabidopsis thaliana
AtSHI	AT5G66350	STRE	AGGGG	345	5	-	Arabidopsis thaliana
AtSHI	AT5G66350	STRE	AGGGG	1319	5	-	Arabidopsis thaliana
AtSHI	AT5G66350	TCT-motif	TCTTAC	153	6	-	Arabidopsis thaliana	part of a light responsive element
AtSHI	AT5G66350	TCT-motif	TCTTAC	819	6	+	Arabidopsis thaliana	part of a light responsive element
AtSHI	AT5G66350	telo-box	AAACCCTAACCCTAA	779	14	+	Nicotiana tabacum
AtSHI	AT5G66350	Unnamed__1	CGTGG	106	5	+	Zea mays
AtSHI	AT5G66350	Unnamed__1	CGTGG	1092	5	+	Zea mays
AtSHI	AT5G66350	Unnamed__1	CGTGG	1126	5	+	Zea mays
AtSHI	AT5G66350	W box	TTGACC	118	6	+	Arabidopsis thaliana
AtSHI	AT5G66350	CAAT-box	CAAT	117	4	-	Nicotiana glutinosa
AtSHI	AT5G66350	CAAT-box	CCAAT	192	5	-	Arabidopsis thaliana	common cis-acting element in promoter and enhancer regions
AtSHI	AT5G66350	CAAT-box	CAAT	532	4	-	Nicotiana glutinosa
AtSHI	AT5G66350	CAAT-box	CCAAT	635	5	-	Arabidopsis thaliana	common cis-acting element in promoter and enhancer regions
AtSHI	AT5G66350	CAAT-box	CAAT	857	4	+	Nicotiana glutinosa
AtSHI	AT5G66350	CAAT-box	CAAT	960	4	-	Nicotiana glutinosa
AtSHI	AT5G66350	CAAT-box	CAAT	1030	4	-	Nicotiana glutinosa
AtSHI	AT5G66350	CAAT-box	CAAT	1041	4	+	Nicotiana glutinosa
AtSHI	AT5G66350	CAAT-box	CAAT	1372	4	+	Nicotiana glutinosa
AtSHI	AT5G66350	CAAT-box	CAAT	1374	4	-	Nicotiana glutinosa
AtSHI	AT5G66350		motif_sequence	45	4	-	organism	short_function
AtSHI	AT5G66350		motif_sequence	66	4	-	organism	short_function
AtSHI	AT5G66350		motif_sequence	79	4	-	organism	short_function
AtSHI	AT5G66350		motif_sequence	259	4	-	organism	short_function
AtSHI	AT5G66350		motif_sequence	286	4	-	organism	short_function
AtSHI	AT5G66350		motif_sequence	442	4	+	organism	short_function
AtSHI	AT5G66350		motif_sequence	563	4	+	organism	short_function
AtSHI	AT5G66350		motif_sequence	754	4	-	organism	short_function
AtSHI	AT5G66350		motif_sequence	1103	4	+	organism	short_function
AtSHI	AT5G66350		motif_sequence	1118	4	-	organism	short_function
AtSHI	AT5G66350	AAGAA-motif	gGTAAAGAAA	65	9	+	Avena sativa
AtSHI	AT5G66350	AAGAA-motif	GAAAGAA	303	7	+	Avena sativa
AtSHI	AT5G66350	AAGAA-motif	gGTAAAGAAA	612	9	+	Avena sativa
AtSHI	AT5G66350	TGA-element	AACGAC	1213	6	+	Brassica oleracea	auxin-responsive element
AtSHI	AT5G66350	3-AF1 binding site	TAAGAGAGGAA	251	11	+	Solanum tuberosum	light responsive element
AtSHI	AT5G66350	Myb-binding site	CAACAG	888	6	+	Nicotiana tabacum
AtSHI	AT5G66350	G-Box	CACGTT	104	6	-	Pisum sativum	cis-acting regulatory element involved in light responsiveness
AtSHI	AT5G66350	G-Box	CACGTG	137	6	+	Pisum sativum	cis-acting regulatory element involved in light responsiveness
AtSHI	AT5G66350	G-Box	CACGTG	1113	6	-	Pisum sativum	cis-acting regulatory element involved in light responsiveness
AtSHI	AT5G66350	G-Box	CACGTG	1124	6	-	Pisum sativum	cis-acting regulatory element involved in light responsiveness
AtSHI	AT5G66350	TCA	TCATCTTCAT	481	9	+	Pisum sativum
AtSHI	AT5G66350	TCA	TCATCTTCAT	984	9	-	Pisum sativum
AtSHI	AT5G66350	Unnamed__4	CTCC	79	4	-	Petroselinum hortense
AtSHI	AT5G66350	Unnamed__4	CTCC	360	4	+	Petroselinum hortense
AtSHI	AT5G66350	Unnamed__4	CTCC	696	4	-	Petroselinum hortense
AtSHI	AT5G66350	Unnamed__4	CTCC	699	4	-	Petroselinum hortense
AtSHI	AT5G66350	Unnamed__4	CTCC	709	4	+	Petroselinum hortense
AtSHI	AT5G66350	Unnamed__4	CTCC	804	4	-	Petroselinum hortense
AtSHI	AT5G66350	Unnamed__4	CTCC	952	4	-	Petroselinum hortense
AtSHI	AT5G66350	Unnamed__4	CTCC	1197	4	-	Petroselinum hortense
AtSHI	AT5G66350	Unnamed__4	CTCC	1201	4	-	Petroselinum hortense
AtSHI	AT5G66350	MYB-like sequence	TAACCA	1309	6	-	Arabidopsis thaliana
AtSHI	AT5G66350	TATA-box	ATTATA	4	6	+	Brassica napus	core promoter element around -30 of transcription start
AtSHI	AT5G66350	TATA-box	TATAA	5	5	-	Arabidopsis thaliana	core promoter element around -30 of transcription start
AtSHI	AT5G66350	TATA-box	TATA	6	4	+	Arabidopsis thaliana	core promoter element around -30 of transcription start
AtSHI	AT5G66350	TATA-box	ATATAT	158	6	+	Brassica napus	core promoter element around -30 of transcription start
AtSHI	AT5G66350	TATA-box	TATA	159	4	+	Arabidopsis thaliana	core promoter element around -30 of transcription start
AtSHI	AT5G66350	TATA-box	TATA	433	4	+	Arabidopsis thaliana	core promoter element around -30 of transcription start
AtSHI	AT5G66350	TATA-box	ATATAT	642	6	+	Brassica napus	core promoter element around -30 of transcription start
AtSHI	AT5G66350	TATA-box	TATA	643	4	+	Arabidopsis thaliana	core promoter element around -30 of transcription start
AtSHI	AT5G66350	TATA-box	TATA	1265	4	-	Arabidopsis thaliana	core promoter element around -30 of transcription start
AtSHI	AT5G66350	ABRE	ACGTG	105	5	+	Arabidopsis thaliana	cis-acting element involved in the abscisic acid responsiveness
AtSHI	AT5G66350	ABRE	CACGTG	137	6	+	Arabidopsis thaliana	cis-acting element involved in the abscisic acid responsiveness
AtSHI	AT5G66350	ABRE	ACGTG	138	5	+	Arabidopsis thaliana	cis-acting element involved in the abscisic acid responsiveness
AtSHI	AT5G66350	ABRE	CACGTG	1113	6	-	Arabidopsis thaliana	cis-acting element involved in the abscisic acid responsiveness
AtSHI	AT5G66350	ABRE	ACGTG	1114	5	+	Arabidopsis thaliana	cis-acting element involved in the abscisic acid responsiveness
AtSHI	AT5G66350	ABRE	CACGTG	1124	6	-	Arabidopsis thaliana	cis-acting element involved in the abscisic acid responsiveness
AtSHI	AT5G66350	ABRE	ACGTG	1125	5	+	Arabidopsis thaliana	cis-acting element involved in the abscisic acid responsiveness
AtSHI	AT5G66350	ARE	AAACCA	372	6	+	Zea mays	cis-acting regulatory element essential for the anaerobic induction
AtSHI	AT5G66350	MYB recognition site	CCGTTG	148	6	-	Arabidopsis thaliana
AtSHI	AT5G66350	TCA-element	CCATCTTTTT	375	9	+	Nicotiana tabacum	cis-acting element involved in salicylic acid responsiveness
AtSHI	AT5G66350	as-1	TGACG	797	5	+	Arabidopsis thaliana
AtSTY1	AT3G51060	Box 4	ATTAAT	28	6	+	Petroselinum crispum	part of a conserved DNA module involved in light responsiveness
AtSTY1	AT3G51060	Box 4	ATTAAT	45	6	+	Petroselinum crispum	part of a conserved DNA module involved in light responsiveness
AtSTY1	AT3G51060	Box 4	ATTAAT	859	6	-	Petroselinum crispum	part of a conserved DNA module involved in light responsiveness
AtSTY1	AT3G51060	Box 4	ATTAAT	898	6	-	Petroselinum crispum	part of a conserved DNA module involved in light responsiveness
AtSTY1	AT3G51060	Box 4	ATTAAT	1191	6	-	Petroselinum crispum	part of a conserved DNA module involved in light responsiveness
AtSTY1	AT3G51060	AT~TATA-box	TATATA	104	6	+	Arabidopsis thaliana
AtSTY1	AT3G51060	AT~TATA-box	TATATA	583	6	+	Arabidopsis thaliana
AtSTY1	AT3G51060	AT~TATA-box	TATATAAA	708	8	-	Arabidopsis thaliana
AtSTY1	AT3G51060	AT~TATA-box	TATATA	710	6	+	Arabidopsis thaliana
AtSTY1	AT3G51060	AT~TATA-box	TATATA	712	6	+	Arabidopsis thaliana
AtSTY1	AT3G51060	AT~TATA-box	TATATA	743	6	-	Arabidopsis thaliana
AtSTY1	AT3G51060	AT~TATA-box	TATATA	1102	6	-	Arabidopsis thaliana
AtSTY1	AT3G51060	AT~TATA-box	TATATA	1208	6	-	Arabidopsis thaliana
AtSTY1	AT3G51060	AT~TATA-box	TATATA	1210	6	-	Arabidopsis thaliana
AtSTY1	AT3G51060	MYC	CATGTG	959	6	-	Arabidopsis thaliana
AtSTY1	AT3G51060	MYC	CATTTG	1071	6	+	Arabidopsis thaliana
AtSTY1	AT3G51060	AAGAA-motif	GAAAGAA	1352	7	+	Avena sativa
AtSTY1	AT3G51060	ARE	AAACCA	72	6	-	Zea mays	cis-acting regulatory element essential for the anaerobic induction
AtSTY1	AT3G51060	ABRE	ACGTG	695	5	+	Arabidopsis thaliana	cis-acting element involved in the abscisic acid responsiveness
AtSTY1	AT3G51060	ABRE	ACGTG	1416	5	+	Arabidopsis thaliana	cis-acting element involved in the abscisic acid responsiveness
AtSTY1	AT3G51060	CAAT-box	CAAT	32	4	-	Nicotiana glutinosa
AtSTY1	AT3G51060	CAAT-box	CAAT	125	4	-	Nicotiana glutinosa
AtSTY1	AT3G51060	CAAT-box	CAAAT	133	5	+	Pisum sativum	common cis-acting element in promoter and enhancer regions
AtSTY1	AT3G51060	CAAT-box	CAAT	136	4	-	Nicotiana glutinosa
AtSTY1	AT3G51060	CAAT-box	CAAT	144	4	+	Nicotiana glutinosa
AtSTY1	AT3G51060	CAAT-box	CCAAT	176	5	-	Arabidopsis thaliana	common cis-acting element in promoter and enhancer regions
AtSTY1	AT3G51060	CAAT-box	CAAAT	181	5	-	Pisum sativum	common cis-acting element in promoter and enhancer regions
AtSTY1	AT3G51060	CAAT-box	CAAT	229	4	+	Nicotiana glutinosa
AtSTY1	AT3G51060	CAAT-box	CAAT	479	4	+	Nicotiana glutinosa
AtSTY1	AT3G51060	CAAT-box	CAAAT	856	5	+	Pisum sativum	common cis-acting element in promoter and enhancer regions
AtSTY1	AT3G51060	CAAT-box	CAAAT	911	5	-	Pisum sativum	common cis-acting element in promoter and enhancer regions
AtSTY1	AT3G51060	CAAT-box	CAAAT	916	5	+	Pisum sativum	common cis-acting element in promoter and enhancer regions
AtSTY1	AT3G51060	CAAT-box	CAAAT	972	5	-	Pisum sativum	common cis-acting element in promoter and enhancer regions
AtSTY1	AT3G51060	CAAT-box	CAAT	1054	4	+	Nicotiana glutinosa
AtSTY1	AT3G51060	CAAT-box	CAAAT	1063	5	-	Pisum sativum	common cis-acting element in promoter and enhancer regions
AtSTY1	AT3G51060	CAAT-box	CAAAT	1072	5	-	Pisum sativum	common cis-acting element in promoter and enhancer regions
AtSTY1	AT3G51060	CAAT-box	CAAT	1080	4	+	Nicotiana glutinosa
AtSTY1	AT3G51060	ERE	ATTTCATA	1326	8	+	Nicotiana glutinos
AtSTY1	AT3G51060	G-Box	CACGTT	1415	6	-	Pisum sativum	cis-acting regulatory element involved in light responsiveness
AtSTY1	AT3G51060	TCA-element	CCATCTTTTT	361	9	+	Nicotiana tabacum	cis-acting element involved in salicylic acid responsiveness
AtSTY1	AT3G51060	LTR	CCGAAA	434	6	-	Hordeum vulgare	cis-acting element involved in low-temperature responsiveness
AtSTY1	AT3G51060	LTR	CCGAAA	1202	6	+	Hordeum vulgare	cis-acting element involved in low-temperature responsiveness
AtSTY1	AT3G51060	Unnamed__4	CTCC	922	4	+	Petroselinum hortense
AtSTY1	AT3G51060	Unnamed__4	CTCC	1039	4	+	Petroselinum hortense
AtSTY1	AT3G51060	Unnamed__4	CTCC	1182	4	-	Petroselinum hortense
AtSTY1	AT3G51060	Unnamed__4	CTCC	1273	4	+	Petroselinum hortense
AtSTY1	AT3G51060	TCT-motif	TCTTAC	1337	6	-	Arabidopsis thaliana	part of a light responsive element
AtSTY1	AT3G51060	GT1-motif	GGTTAA	300	6	-	Arabidopsis thaliana	light responsive element
AtSTY1	AT3G51060	TATA-box	TATA	55	4	+	Arabidopsis thaliana	core promoter element around -30 of transcription start
AtSTY1	AT3G51060	TATA-box	TATA	96	4	+	Arabidopsis thaliana	core promoter element around -30 of transcription start
AtSTY1	AT3G51060	TATA-box	ATATAT	103	6	+	Brassica napus	core promoter element around -30 of transcription start
AtSTY1	AT3G51060	TATA-box	TATATA	104	6	+	Arabidopsis thaliana	core promoter element around -30 of transcription start
AtSTY1	AT3G51060	TATA-box	ATATAA	105	6	+	Brassica oleracea	core promoter element around -30 of transcription start
AtSTY1	AT3G51060	TATA-box	TATA	106	4	+	Arabidopsis thaliana	core promoter element around -30 of transcription start
AtSTY1	AT3G51060	TATA-box	TATAAATA	401	8	-	Daucus carota	core promoter element around -30 of transcription start
AtSTY1	AT3G51060	TATA-box	TATAAAT	402	7	-	Brassica juncea	core promoter element around -30 of transcription start
AtSTY1	AT3G51060	TATA-box	TATAAA	403	6	-	Helianthus annuus	core promoter element around -30 of transcription start
AtSTY1	AT3G51060	TATA-box	TATAA	404	5	-	Arabidopsis thaliana	core promoter element around -30 of transcription start
AtSTY1	AT3G51060	TATA-box	TATA	405	4	+	Arabidopsis thaliana	core promoter element around -30 of transcription start
AtSTY1	AT3G51060	TATA-box	ccTATAAAaa	496	9	+	Arabidopsis thaliana	core promoter element around -30 of transcription start
AtSTY1	AT3G51060	TATA-box	ATTATA	516	6	+	Brassica napus	core promoter element around -30 of transcription start
AtSTY1	AT3G51060	TATA-box	TATAA	517	5	-	Arabidopsis thaliana	core promoter element around -30 of transcription start
AtSTY1	AT3G51060	TATA-box	TATA	518	4	+	Arabidopsis thaliana	core promoter element around -30 of transcription start
AtSTY1	AT3G51060	TATA-box	TATACA	581	6	-	Helianthus annuus	core promoter element around -30 of transcription start
AtSTY1	AT3G51060	TATA-box	TATATA	583	6	+	Arabidopsis thaliana	core promoter element around -30 of transcription start
AtSTY1	AT3G51060	TATA-box	ATATAA	584	6	+	Brassica oleracea	core promoter element around -30 of transcription start
AtSTY1	AT3G51060	TATA-box	TATA	585	4	+	Arabidopsis thaliana	core promoter element around -30 of transcription start
AtSTY1	AT3G51060	TATA-box	ATTATA	614	6	+	Brassica napus	core promoter element around -30 of transcription start
AtSTY1	AT3G51060	TATA-box	TATAA	615	5	-	Arabidopsis thaliana	core promoter element around -30 of transcription start
AtSTY1	AT3G51060	TATA-box	TATA	616	4	+	Arabidopsis thaliana	core promoter element around -30 of transcription start
AtSTY1	AT3G51060	TATA-box	TACAAAA	618	7	+	Oryza sativa	core promoter element around -30 of transcription start
AtSTY1	AT3G51060	TATA-box	taTATAAAtc	706	9	-	Arabidopsis thaliana	core promoter element around -30 of transcription start
AtSTY1	AT3G51060	TATA-box	TATAAAT	707	7	-	Brassica juncea	core promoter element around -30 of transcription start
AtSTY1	AT3G51060	TATA-box	TATAAA	708	6	-	Helianthus annuus	core promoter element around -30 of transcription start
AtSTY1	AT3G51060	TATA-box	TATATAA	709	7	-	Arabidopsis thaliana	core promoter element around -30 of transcription start
AtSTY1	AT3G51060	TATA-box	TATATA	710	6	+	Arabidopsis thaliana	core promoter element around -30 of transcription start
AtSTY1	AT3G51060	TATA-box	ATATAT	711	6	+	Brassica napus	core promoter element around -30 of transcription start
AtSTY1	AT3G51060	TATA-box	TATATA	712	6	+	Arabidopsis thaliana	core promoter element around -30 of transcription start
AtSTY1	AT3G51060	TATA-box	ATATAA	713	6	+	Brassica oleracea	core promoter element around -30 of transcription start
AtSTY1	AT3G51060	TATA-box	TATA	714	4	+	Arabidopsis thaliana	core promoter element around -30 of transcription start
AtSTY1	AT3G51060	TATA-box	TATA	732	4	-	Arabidopsis thaliana	core promoter element around -30 of transcription start
AtSTY1	AT3G51060	TATA-box	TATATA	743	6	-	Arabidopsis thaliana	core promoter element around -30 of transcription start
AtSTY1	AT3G51060	TATA-box	TATA	745	4	-	Arabidopsis thaliana	core promoter element around -30 of transcription start
AtSTY1	AT3G51060	TATA-box	TATACA	757	6	-	Helianthus annuus	core promoter element around -30 of transcription start
AtSTY1	AT3G51060	TATA-box	TATA	759	4	-	Arabidopsis thaliana	core promoter element around -30 of transcription start
AtSTY1	AT3G51060	TATA-box	TATA	907	4	-	Arabidopsis thaliana	core promoter element around -30 of transcription start
AtSTY1	AT3G51060	TATA-box	ATATAT	1059	6	-	Brassica napus	core promoter element around -30 of transcription start
AtSTY1	AT3G51060	TATA-box	TATA	1060	4	-	Arabidopsis thaliana	core promoter element around -30 of transcription start
AtSTY1	AT3G51060	TATA-box	ATATAT	1101	6	-	Brassica napus	core promoter element around -30 of transcription start
AtSTY1	AT3G51060	TATA-box	TATATA	1102	6	-	Arabidopsis thaliana	core promoter element around -30 of transcription start
AtSTY1	AT3G51060	TATA-box	TATA	1104	4	-	Arabidopsis thaliana	core promoter element around -30 of transcription start
AtSTY1	AT3G51060	TATA-box	TACAAAA	1154	7	-	Oryza sativa	core promoter element around -30 of transcription start
AtSTY1	AT3G51060	TATA-box	ATATAT	1207	6	-	Brassica napus	core promoter element around -30 of transcription start
AtSTY1	AT3G51060	TATA-box	TATATA	1208	6	-	Arabidopsis thaliana	core promoter element around -30 of transcription start
AtSTY1	AT3G51060	TATA-box	ATATAT	1209	6	-	Brassica napus	core promoter element around -30 of transcription start
AtSTY1	AT3G51060	TATA-box	TATATA	1210	6	-	Arabidopsis thaliana	core promoter element around -30 of transcription start
AtSTY1	AT3G51060	TATA-box	TATA	1212	4	-	Arabidopsis thaliana	core promoter element around -30 of transcription start
AtSTY1	AT3G51060	TATA-box	TATAAAT	1310	7	-	Brassica juncea	core promoter element around -30 of transcription start
AtSTY1	AT3G51060	TATA-box	TATAAA	1311	6	-	Helianthus annuus	core promoter element around -30 of transcription start
AtSTY1	AT3G51060	TATA-box	TATAA	1312	5	-	Arabidopsis thaliana	core promoter element around -30 of transcription start
AtSTY1	AT3G51060	TATA-box	TATA	1313	4	-	Arabidopsis thaliana	core promoter element around -30 of transcription start
AtSTY1	AT3G51060	TATA-box	ccTATAAAaa	1317	9	+	Arabidopsis thaliana	core promoter element around -30 of transcription start
AtSTY1	AT3G51060	TATA-box	ATATAA	1318	6	+	Brassica oleracea	core promoter element around -30 of transcription start
AtSTY1	AT3G51060	TATA-box	TATA	1319	4	-	Arabidopsis thaliana	core promoter element around -30 of transcription start
AtSTY1	AT3G51060	TATA-box	ATATAT	1331	6	-	Brassica napus	core promoter element around -30 of transcription start
AtSTY1	AT3G51060	TATA-box	TATA	1332	4	-	Arabidopsis thaliana	core promoter element around -30 of transcription start
AtSTY1	AT3G51060	STRE	AGGGG	20	5	-	Arabidopsis thaliana
AtSTY1	AT3G51060	STRE	AGGGG	304	5	-	Arabidopsis thaliana
AtSTY1	AT3G51060	ABRE4	CACGTA	694	6	-	Zea mays
AtSTY1	AT3G51060	GA-motif	ATAGATAA	966	8	-	Arabidopsis thaliana	part of a light responsive element
AtSTY1	AT3G51060	Unnamed__1	CGTGG	1417	5	+	Zea mays
AtSTY1	AT3G51060	G-box	TACGTG	694	6	+	Arabidopsis thaliana	cis-acting regulatory element involved in light responsiveness
AtSTY1	AT3G51060	G-box	TAACACGTAG	1043	9	+	Brassica oleracea	cis-acting regulatory element involved in light responsiveness
AtSTY1	AT3G51060	TC-rich repeats	GTTTTCTTAC	1337	9	-	Nicotiana tabacum	cis-acting element involved in defense and stress responsiveness
AtSTY1	AT3G51060	ABRE3a	TACGTG	694	6	+	Zea mays
AtSTY1	AT3G51060	Sp1	GGGCGG	218	6	+	Oryza sativa	light responsive element
AtSTY1	AT3G51060		motif_sequence	327	4	+	organism	short_function
AtSTY1	AT3G51060		motif_sequence	386	4	+	organism	short_function
AtSTY1	AT3G51060		motif_sequence	448	4	-	organism	short_function
AtSTY1	AT3G51060		motif_sequence	673	4	+	organism	short_function
AtSTY1	AT3G51060		motif_sequence	803	4	+	organism	short_function
AtSTY1	AT3G51060		motif_sequence	876	4	-	organism	short_function
AtSTY1	AT3G51060	TATA	TATAAAAT	714	8	+	Arabidopsis thaliana
AtSTY1	AT3G51060	AuxRR-core	GGTCCAT	1129	7	-	Nicotiana tabacum	cis-acting regulatory element involved in auxin responsiveness
AtSTY1	AT3G51060	MRE	AACCTAA	116	7	+	Petroselinum crispum	MYB binding site involved in light responsiveness
AtSTY2	AT4G36260	TATA	TATAAAAT	656	8	-	Arabidopsis thaliana
AtSTY2	AT4G36260	TGA-element	AACGAC	336	6	-	Brassica oleracea	auxin-responsive element
AtSTY2	AT4G36260	Unnamed__4	CTCC	604	4	+	Petroselinum hortense
AtSTY2	AT4G36260	Box II	tGTGTGGTTAATATG	1128	14	-	Pisum sativum	part of a light responsive element
AtSTY2	AT4G36260	AE-box	AGAAACAA	117	8	-	Arabidopsis thaliana	part of a module for light response
AtSTY2	AT4G36260		motif_sequence	774	4	-	organism	short_function
AtSTY2	AT4G36260		motif_sequence	1441	4	-	organism	short_function
AtSTY2	AT4G36260	CAAT-box	CAAAT	28	5	-	Pisum sativum	common cis-acting element in promoter and enhancer regions
AtSTY2	AT4G36260	CAAT-box	CAAT	116	4	-	Nicotiana glutinosa
AtSTY2	AT4G36260	CAAT-box	CAAT	144	4	-	Nicotiana glutinosa
AtSTY2	AT4G36260	CAAT-box	CAAT	165	4	+	Nicotiana glutinosa
AtSTY2	AT4G36260	CAAT-box	CAAAT	310	5	+	Pisum sativum	common cis-acting element in promoter and enhancer regions
AtSTY2	AT4G36260	CAAT-box	CAAT	322	4	+	Nicotiana glutinosa
AtSTY2	AT4G36260	CAAT-box	CAAAT	506	5	+	Pisum sativum	common cis-acting element in promoter and enhancer regions
AtSTY2	AT4G36260	CAAT-box	CAAAT	537	5	-	Pisum sativum	common cis-acting element in promoter and enhancer regions
AtSTY2	AT4G36260	CAAT-box	CAAT	545	4	+	Nicotiana glutinosa
AtSTY2	AT4G36260	CAAT-box	CAAT	549	4	+	Nicotiana glutinosa
AtSTY2	AT4G36260	CAAT-box	CAAAT	618	5	-	Pisum sativum	common cis-acting element in promoter and enhancer regions
AtSTY2	AT4G36260	CAAT-box	CAAT	630	4	-	Nicotiana glutinosa
AtSTY2	AT4G36260	CAAT-box	CAAAT	708	5	-	Pisum sativum	common cis-acting element in promoter and enhancer regions
AtSTY2	AT4G36260	CAAT-box	CAAT	722	4	-	Nicotiana glutinosa
AtSTY2	AT4G36260	CAAT-box	CAAT	842	4	-	Nicotiana glutinosa
AtSTY2	AT4G36260	CAAT-box	CAAT	926	4	+	Nicotiana glutinosa
AtSTY2	AT4G36260	CAAT-box	CAAT	932	4	-	Nicotiana glutinosa
AtSTY2	AT4G36260	CAAT-box	CAAAT	942	5	+	Pisum sativum	common cis-acting element in promoter and enhancer regions
AtSTY2	AT4G36260	CAAT-box	CAAT	1034	4	-	Nicotiana glutinosa
AtSTY2	AT4G36260	CAAT-box	CAAAT	1141	5	+	Pisum sativum	common cis-acting element in promoter and enhancer regions
AtSTY2	AT4G36260	CAAT-box	CAAAT	1166	5	-	Pisum sativum	common cis-acting element in promoter and enhancer regions
AtSTY2	AT4G36260	CAAT-box	CAAT	1203	4	+	Nicotiana glutinosa
AtSTY2	AT4G36260	CAAT-box	CAAT	1211	4	-	Nicotiana glutinosa
AtSTY2	AT4G36260	CAAT-box	CAAAT	1295	5	+	Pisum sativum	common cis-acting element in promoter and enhancer regions
AtSTY2	AT4G36260	CAAT-box	CAAT	1405	4	-	Nicotiana glutinosa
AtSTY2	AT4G36260	MRE	AACCTAA	1301	7	+	Petroselinum crispum	MYB binding site involved in light responsiveness
AtSTY2	AT4G36260	MYB	CAACCA	124	6	-	Arabidopsis thaliana
AtSTY2	AT4G36260	MYB	CAACAG	230	6	+	Arabidopsis thaliana
AtSTY2	AT4G36260	MYB	TAACCA	1133	6	+	Arabidopsis thaliana
AtSTY2	AT4G36260	MYB	TAACCA	1363	6	+	Arabidopsis thaliana
AtSTY2	AT4G36260	AuxRR-core	GGTCCAT	1466	7	+	Nicotiana tabacum	cis-acting regulatory element involved in auxin responsiveness
AtSTY2	AT4G36260	GT1-motif	GGTTAAT	1131	7	-	Avena sativa	light responsive element
AtSTY2	AT4G36260	GT1-motif	GGTTAA	1132	6	-	Arabidopsis thaliana	light responsive element
AtSTY2	AT4G36260	GT1-motif	GGTTAAT	1298	7	-	Avena sativa	light responsive element
AtSTY2	AT4G36260	GT1-motif	GGTTAA	1299	6	-	Arabidopsis thaliana	light responsive element
AtSTY2	AT4G36260	Unnamed__1	CGTGG	344	5	+	Zea mays
AtSTY2	AT4G36260	Unnamed__1	CGTGG	1366	5	-	Zea mays
AtSTY2	AT4G36260	Unnamed__1	GCCACGTGGC	1449	9	-	Petunia sp.
AtSTY2	AT4G36260	as-1	TGACG	844	5	+	Arabidopsis thaliana
AtSTY2	AT4G36260	Unnamed__14	TCCACGTAGA	340	9	-	Zea mays
AtSTY2	AT4G36260	MYB-like sequence	TAACCA	1133	6	+	Arabidopsis thaliana
AtSTY2	AT4G36260	MYB-like sequence	TAACCA	1363	6	+	Arabidopsis thaliana
AtSTY2	AT4G36260	chs-CMA1a	TTACTTAA	1079	8	+	Daucus carota	part of a light responsive element
AtSTY2	AT4G36260	ATC-motif	AGTAATCT	1044	8	-	Spinacia oleracea	part of a conserved DNA module involved in light responsiveness
AtSTY2	AT4G36260	Unnamed__10	TCCACGTAGA	340	9	-	Zea mays
AtSTY2	AT4G36260	CTAG-motif	ACTAGCAGAA	697	9	+	Avena sativa
AtSTY2	AT4G36260	Box 4	ATTAAT	72	6	+	Petroselinum crispum	part of a conserved DNA module involved in light responsiveness
AtSTY2	AT4G36260	Box 4	ATTAAT	1322	6	-	Petroselinum crispum	part of a conserved DNA module involved in light responsiveness
AtSTY2	AT4G36260	MYC	CATGTG	53	6	+	Arabidopsis thaliana
AtSTY2	AT4G36260	MYC	CATTTG	536	6	+	Arabidopsis thaliana
AtSTY2	AT4G36260	MYC	CATGTG	664	6	-	Arabidopsis thaliana
AtSTY2	AT4G36260	MYC	CATGTG	1337	6	-	Arabidopsis thaliana
AtSTY2	AT4G36260	WRE3	CCACCT	137	6	-	Pisum sativum
AtSTY2	AT4G36260	WRE3	CCACCT	399	6	-	Pisum sativum
AtSTY2	AT4G36260	Myb-binding site	CAACAG	230	6	+	Nicotiana tabacum
AtSTY2	AT4G36260	ABRE3a	TACGTG	342	6	+	Zea mays
AtSTY2	AT4G36260	ABRE3a	TACGTG	394	6	-	Zea mays
AtSTY2	AT4G36260	Unnamed__12	TCCACGTAGA	340	9	-	Zea mays
AtSTY2	AT4G36260	G-box	CCACGTAA	341	8	-	Brassica napus	cis-acting regulatory element involved in light responsiveness
AtSTY2	AT4G36260	G-box	TACGTG	342	6	+	Arabidopsis thaliana	cis-acting regulatory element involved in light responsiveness
AtSTY2	AT4G36260	G-box	TACGTG	394	6	-	Arabidopsis thaliana	cis-acting regulatory element involved in light responsiveness
AtSTY2	AT4G36260	TGACG-motif	TGACG	844	5	+	Hordeum vulgare	cis-acting regulatory element involved in the MeJA-responsiveness
AtSTY2	AT4G36260	ARE	AAACCA	280	6	+	Zea mays	cis-acting regulatory element essential for the anaerobic induction
AtSTY2	AT4G36260	ARE	AAACCA	815	6	-	Zea mays	cis-acting regulatory element essential for the anaerobic induction
AtSTY2	AT4G36260	Unnamed__8	TCCACGTAGA	340	9	-	Zea mays
AtSTY2	AT4G36260	TATA-box	TATA	104	4	+	Arabidopsis thaliana	core promoter element around -30 of transcription start
AtSTY2	AT4G36260	TATA-box	taTATAAAtc	350	9	-	Arabidopsis thaliana	core promoter element around -30 of transcription start
AtSTY2	AT4G36260	TATA-box	TATAAAT	351	7	-	Brassica juncea	core promoter element around -30 of transcription start
AtSTY2	AT4G36260	TATA-box	TATAAA	352	6	-	Helianthus annuus	core promoter element around -30 of transcription start
AtSTY2	AT4G36260	TATA-box	TATATAA	353	7	-	Arabidopsis thaliana	core promoter element around -30 of transcription start
AtSTY2	AT4G36260	TATA-box	TATATA	354	6	+	Arabidopsis thaliana	core promoter element around -30 of transcription start
AtSTY2	AT4G36260	TATA-box	ATATAA	355	6	+	Brassica oleracea	core promoter element around -30 of transcription start
AtSTY2	AT4G36260	TATA-box	TATA	356	4	+	Arabidopsis thaliana	core promoter element around -30 of transcription start
AtSTY2	AT4G36260	TATA-box	TACAAAA	382	7	+	Oryza sativa	core promoter element around -30 of transcription start
AtSTY2	AT4G36260	TATA-box	TATACA	418	6	-	Helianthus annuus	core promoter element around -30 of transcription start
AtSTY2	AT4G36260	TATA-box	TATA	420	4	+	Arabidopsis thaliana	core promoter element around -30 of transcription start
AtSTY2	AT4G36260	TATA-box	TACAAAA	481	7	-	Oryza sativa	core promoter element around -30 of transcription start
AtSTY2	AT4G36260	TATA-box	ATATAA	523	6	+	Brassica oleracea	core promoter element around -30 of transcription start
AtSTY2	AT4G36260	TATA-box	TATA	524	4	+	Arabidopsis thaliana	core promoter element around -30 of transcription start
AtSTY2	AT4G36260	TATA-box	TATA	636	4	+	Arabidopsis thaliana	core promoter element around -30 of transcription start
AtSTY2	AT4G36260	TATA-box	TATAAAA	657	7	-	Pisum sativum	core promoter element around -30 of transcription start
AtSTY2	AT4G36260	TATA-box	TATAAA	658	6	-	Helianthus annuus	core promoter element around -30 of transcription start
AtSTY2	AT4G36260	TATA-box	TATAA	659	5	-	Arabidopsis thaliana	core promoter element around -30 of transcription start
AtSTY2	AT4G36260	TATA-box	TATA	660	4	+	Arabidopsis thaliana	core promoter element around -30 of transcription start
AtSTY2	AT4G36260	TATA-box	taTATAAAtc	682	9	-	Arabidopsis thaliana	core promoter element around -30 of transcription start
AtSTY2	AT4G36260	TATA-box	TATAAAT	683	7	-	Brassica juncea	core promoter element around -30 of transcription start
AtSTY2	AT4G36260	TATA-box	TATAAA	684	6	-	Helianthus annuus	core promoter element around -30 of transcription start
AtSTY2	AT4G36260	TATA-box	TATAA	685	5	-	Arabidopsis thaliana	core promoter element around -30 of transcription start
AtSTY2	AT4G36260	TATA-box	TATA	686	4	+	Arabidopsis thaliana	core promoter element around -30 of transcription start
AtSTY2	AT4G36260	TATA-box	TATTTAAA	730	8	+	Arabidopsis thaliana	core promoter element around -30 of transcription start
AtSTY2	AT4G36260	TATA-box	TATTTAAA	732	8	-	Arabidopsis thaliana	core promoter element around -30 of transcription start
AtSTY2	AT4G36260	TATA-box	ATATAT	737	6	+	Brassica napus	core promoter element around -30 of transcription start
AtSTY2	AT4G36260	TATA-box	TATATA	738	6	+	Arabidopsis thaliana	core promoter element around -30 of transcription start
AtSTY2	AT4G36260	TATA-box	ATATAA	739	6	+	Brassica oleracea	core promoter element around -30 of transcription start
AtSTY2	AT4G36260	TATA-box	TATA	740	4	+	Arabidopsis thaliana	core promoter element around -30 of transcription start
AtSTY2	AT4G36260	TATA-box	TATTTAAA	807	8	-	Arabidopsis thaliana	core promoter element around -30 of transcription start
AtSTY2	AT4G36260	TATA-box	TATATTTATATTT	962	12	-	Avena sativa	core promoter element around -30 of transcription start
AtSTY2	AT4G36260	TATA-box	ATATAT	964	6	-	Brassica napus	core promoter element around -30 of transcription start
AtSTY2	AT4G36260	TATA-box	TATATTTATATTT	965	12	+	Avena sativa	core promoter element around -30 of transcription start
AtSTY2	AT4G36260	TATA-box	ATATAT	966	6	-	Brassica napus	core promoter element around -30 of transcription start
AtSTY2	AT4G36260	TATA-box	TATATA	967	6	-	Arabidopsis thaliana	core promoter element around -30 of transcription start
AtSTY2	AT4G36260	TATA-box	ATATAT	968	6	-	Brassica napus	core promoter element around -30 of transcription start
AtSTY2	AT4G36260	TATA-box	TATATA	969	6	-	Arabidopsis thaliana	core promoter element around -30 of transcription start
AtSTY2	AT4G36260	TATA-box	ATATAT	970	6	-	Brassica napus	core promoter element around -30 of transcription start
AtSTY2	AT4G36260	TATA-box	TATA	971	4	-	Arabidopsis thaliana	core promoter element around -30 of transcription start
AtSTY2	AT4G36260	TATA-box	ATATAT	993	6	-	Brassica napus	core promoter element around -30 of transcription start
AtSTY2	AT4G36260	TATA-box	TATA	994	4	-	Arabidopsis thaliana	core promoter element around -30 of transcription start
AtSTY2	AT4G36260	TATA-box	ATATAA	1177	6	+	Brassica oleracea	core promoter element around -30 of transcription start
AtSTY2	AT4G36260	TATA-box	TATA	1178	4	-	Arabidopsis thaliana	core promoter element around -30 of transcription start
AtSTY2	AT4G36260	AT~TATA-box	TATATAAA	352	8	-	Arabidopsis thaliana
AtSTY2	AT4G36260	AT~TATA-box	TATATA	354	6	+	Arabidopsis thaliana
AtSTY2	AT4G36260	AT~TATA-box	TATATA	738	6	+	Arabidopsis thaliana
AtSTY2	AT4G36260	AT~TATA-box	TATATA	965	6	-	Arabidopsis thaliana
AtSTY2	AT4G36260	AT~TATA-box	TATATA	967	6	-	Arabidopsis thaliana
AtSTY2	AT4G36260	AT~TATA-box	TATATA	969	6	-	Arabidopsis thaliana
AtSTY2	AT4G36260	L-box	ATCCCACCTAC	135	10	-	Petroselinum crispum	part of a light responsive element
AtSTY2	AT4G36260	ABRE4	CACGTA	342	6	-	Zea mays
AtSTY2	AT4G36260	ABRE4	CACGTA	394	6	+	Zea mays
AtSTY2	AT4G36260	CAT-box	GCCACT	757	6	-	Arabidopsis thaliana	cis-acting regulatory element related to meristem expression
AtSTY2	AT4G36260	CAT-box	GCCACT	1449	6	+	Arabidopsis thaliana	cis-acting regulatory element related to meristem expression
AtSTY2	AT4G36260	ABRE	AACCCGG	288	7	+	Arabidopsis thaliana	cis-acting element involved in the abscisic acid responsiveness
AtSTY2	AT4G36260	ABRE	ACGTG	343	5	+	Arabidopsis thaliana	cis-acting element involved in the abscisic acid responsiveness
AtSTY2	AT4G36260	ABRE	ACGTG	394	5	-	Arabidopsis thaliana	cis-acting element involved in the abscisic acid responsiveness
AtSTY2	AT4G36260	CGTCA-motif	CGTCA	844	5	-	Hordeum vulgare	cis-acting regulatory element involved in the MeJA-responsiveness
AtLRP1	AT5G12330	ABRE4	CACGTA	571	6	+	Zea mays
AtLRP1	AT5G12330	CAAT-box	CCAAT	31	5	-	Arabidopsis thaliana	common cis-acting element in promoter and enhancer regions
AtLRP1	AT5G12330	CAAT-box	CAAT	119	4	-	Nicotiana glutinosa
AtLRP1	AT5G12330	CAAT-box	CAAT	247	4	-	Nicotiana glutinosa
AtLRP1	AT5G12330	CAAT-box	CAAT	350	4	+	Nicotiana glutinosa
AtLRP1	AT5G12330	CAAT-box	CAAT	421	4	+	Nicotiana glutinosa
AtLRP1	AT5G12330	CAAT-box	CAAT	491	4	+	Nicotiana glutinosa
AtLRP1	AT5G12330	CAAT-box	CAAT	558	4	-	Nicotiana glutinosa
AtLRP1	AT5G12330	CAAT-box	CAAT	562	4	+	Nicotiana glutinosa
AtLRP1	AT5G12330	CAAT-box	CCAAT	594	5	+	Arabidopsis thaliana	common cis-acting element in promoter and enhancer regions
AtLRP1	AT5G12330	CAAT-box	CAAT	595	4	+	Nicotiana glutinosa
AtLRP1	AT5G12330	CAAT-box	CAAAT	623	5	-	Pisum sativum	common cis-acting element in promoter and enhancer regions
AtLRP1	AT5G12330	CAAT-box	CCAAT	643	5	-	Arabidopsis thaliana	common cis-acting element in promoter and enhancer regions
AtLRP1	AT5G12330	CAAT-box	CAAT	742	4	+	Nicotiana glutinosa
AtLRP1	AT5G12330	CAAT-box	CAAT	864	4	-	Nicotiana glutinosa
AtLRP1	AT5G12330	CAAT-box	CAAAT	979	5	-	Pisum sativum	common cis-acting element in promoter and enhancer regions
AtLRP1	AT5G12330	CAAT-box	CAAT	1002	4	+	Nicotiana glutinosa
AtLRP1	AT5G12330	CAAT-box	CAAT	1157	4	+	Nicotiana glutinosa
AtLRP1	AT5G12330	CAAT-box	CAAT	1424	4	+	Nicotiana glutinosa
AtLRP1	AT5G12330	G-Box	CACGTGAAA	482	9	-	Pisum sativum	cis-acting regulatory element involved in light responsiveness
AtLRP1	AT5G12330	G-Box	CACGTG	485	6	+	Pisum sativum	cis-acting regulatory element involved in light responsiveness
AtLRP1	AT5G12330	G-Box	CACGTT	805	6	-	Pisum sativum	cis-acting regulatory element involved in light responsiveness
AtLRP1	AT5G12330	TGACG-motif	TGACG	166	5	+	Hordeum vulgare	cis-acting regulatory element involved in the MeJA-responsiveness
AtLRP1	AT5G12330	TGACG-motif	TGACG	1407	5	-	Hordeum vulgare	cis-acting regulatory element involved in the MeJA-responsiveness
AtLRP1	AT5G12330	TCA	TCATCTTCAT	1023	9	-	Pisum sativum
AtLRP1	AT5G12330	MYC	CATGTG	162	6	-	Arabidopsis thaliana
AtLRP1	AT5G12330	MYC	CATGTG	1488	6	+	Arabidopsis thaliana
AtLRP1	AT5G12330	ABRE	CACGTG	485	6	+	Arabidopsis thaliana	cis-acting element involved in the abscisic acid responsiveness
AtLRP1	AT5G12330	ABRE	ACGTG	486	5	+	Arabidopsis thaliana	cis-acting element involved in the abscisic acid responsiveness
AtLRP1	AT5G12330	ABRE	ACGTG	571	5	-	Arabidopsis thaliana	cis-acting element involved in the abscisic acid responsiveness
AtLRP1	AT5G12330	ABRE	ACGTG	806	5	+	Arabidopsis thaliana	cis-acting element involved in the abscisic acid responsiveness
AtLRP1	AT5G12330	CAT-box	GCCACT	1268	6	+	Arabidopsis thaliana	cis-acting regulatory element related to meristem expression
AtLRP1	AT5G12330	AC-I	(T/C)C(T/C)(C/T)ACC(T/C)ACC	1392	8.5	-	Phaseolus vulgaris
AtLRP1	AT5G12330	ARE	AAACCA	591	6	+	Zea mays	cis-acting regulatory element essential for the anaerobic induction
AtLRP1	AT5G12330	ARE	AAACCA	656	6	+	Zea mays	cis-acting regulatory element essential for the anaerobic induction
AtLRP1	AT5G12330	ARE	AAACCA	878	6	+	Zea mays	cis-acting regulatory element essential for the anaerobic induction
AtLRP1	AT5G12330	GTGGC-motif	CAGCGTGTGGC	200	10	-	Hordeum vulgare	part of a light responsive element
AtLRP1	AT5G12330	GT1-motif	GGTTAA	156	6	-	Arabidopsis thaliana	light responsive element
AtLRP1	AT5G12330	GT1-motif	GGTTAAT	681	7	-	Avena sativa	light responsive element
AtLRP1	AT5G12330	GT1-motif	GGTTAA	682	6	-	Arabidopsis thaliana	light responsive element
AtLRP1	AT5G12330	DRE core	GCCGAC	454	6	+	Arabidopsis thaliana
AtLRP1	AT5G12330	GC-motif	CCCCCG	1388	6	-	Zea mays	enhancer-like element involved in anoxic specific inducibility
AtLRP1	AT5G12330	as-1	TGACG	166	5	+	Arabidopsis thaliana
AtLRP1	AT5G12330	as-1	TGACG	1407	5	-	Arabidopsis thaliana
AtLRP1	AT5G12330	Box 4	ATTAAT	817	6	-	Petroselinum crispum	part of a conserved DNA module involved in light responsiveness
AtLRP1	AT5G12330	MYB	CAACAG	208	6	-	Arabidopsis thaliana
AtLRP1	AT5G12330	MYB	TAACCA	645	6	-	Arabidopsis thaliana
AtLRP1	AT5G12330	MYB	CAACAG	1007	6	+	Arabidopsis thaliana
AtLRP1	AT5G12330	ABRE3a	TACGTG	571	6	-	Zea mays
AtLRP1	AT5G12330	Myb-binding site	CAACAG	208	6	-	Nicotiana tabacum
AtLRP1	AT5G12330	Myb-binding site	CAACAG	1007	6	+	Nicotiana tabacum
AtLRP1	AT5G12330	TATA-box	ATATAA	26	6	+	Brassica oleracea	core promoter element around -30 of transcription start
AtLRP1	AT5G12330	TATA-box	TATA	27	4	+	Arabidopsis thaliana	core promoter element around -30 of transcription start
AtLRP1	AT5G12330	TATA-box	TATTTAAA	87	8	+	Arabidopsis thaliana	core promoter element around -30 of transcription start
AtLRP1	AT5G12330	TATA-box	TACAAAA	125	7	-	Oryza sativa	core promoter element around -30 of transcription start
AtLRP1	AT5G12330	TATA-box	TATACA	185	6	-	Helianthus annuus	core promoter element around -30 of transcription start
AtLRP1	AT5G12330	TATA-box	TATA	187	4	+	Arabidopsis thaliana	core promoter element around -30 of transcription start
AtLRP1	AT5G12330	TATA-box	TATTTAAA	229	8	+	Arabidopsis thaliana	core promoter element around -30 of transcription start
AtLRP1	AT5G12330	TATA-box	TATA	257	4	+	Arabidopsis thaliana	core promoter element around -30 of transcription start
AtLRP1	AT5G12330	TATA-box	TATAAAA	523	7	-	Pisum sativum	core promoter element around -30 of transcription start
AtLRP1	AT5G12330	TATA-box	TATAAA	524	6	-	Helianthus annuus	core promoter element around -30 of transcription start
AtLRP1	AT5G12330	TATA-box	TATATAA	525	7	-	Arabidopsis thaliana	core promoter element around -30 of transcription start
AtLRP1	AT5G12330	TATA-box	TATATA	526	6	+	Arabidopsis thaliana	core promoter element around -30 of transcription start
AtLRP1	AT5G12330	TATA-box	ATATAA	527	6	+	Brassica oleracea	core promoter element around -30 of transcription start
AtLRP1	AT5G12330	TATA-box	TATA	528	4	+	Arabidopsis thaliana	core promoter element around -30 of transcription start
AtLRP1	AT5G12330	TATA-box	ATTATA	564	6	+	Brassica napus	core promoter element around -30 of transcription start
AtLRP1	AT5G12330	TATA-box	TATAA	565	5	-	Arabidopsis thaliana	core promoter element around -30 of transcription start
AtLRP1	AT5G12330	TATA-box	TATA	566	4	+	Arabidopsis thaliana	core promoter element around -30 of transcription start
AtLRP1	AT5G12330	TATA-box	TACAAAA	587	7	+	Oryza sativa	core promoter element around -30 of transcription start
AtLRP1	AT5G12330	TATA-box	TATA	875	4	-	Arabidopsis thaliana	core promoter element around -30 of transcription start
AtLRP1	AT5G12330	TATA-box	TATA	1039	4	-	Arabidopsis thaliana	core promoter element around -30 of transcription start
AtLRP1	AT5G12330	TATA-box	ccTATAAAaa	1209	9	-	Arabidopsis thaliana	core promoter element around -30 of transcription start
AtLRP1	AT5G12330	TATA-box	TATATAA	1210	7	-	Arabidopsis thaliana	core promoter element around -30 of transcription start
AtLRP1	AT5G12330	TATA-box	TATATA	1211	6	-	Arabidopsis thaliana	core promoter element around -30 of transcription start
AtLRP1	AT5G12330	TATA-box	TATA	1213	4	-	Arabidopsis thaliana	core promoter element around -30 of transcription start
AtLRP1	AT5G12330	TATA-box	TACATAAA	1259	8	-	Oryza sativa	core promoter element around -30 of transcription start
AtLRP1	AT5G12330	TATA-box	TACAAAA	1285	7	+	Oryza sativa	core promoter element around -30 of transcription start
AtLRP1	AT5G12330	TATA-box	TACATAAA	1434	8	+	Oryza sativa	core promoter element around -30 of transcription start
AtLRP1	AT5G12330	TATA-box	ATTATA	1444	6	+	Brassica napus	core promoter element around -30 of transcription start
AtLRP1	AT5G12330	TATA-box	TATAA	1445	5	-	Arabidopsis thaliana	core promoter element around -30 of transcription start
AtLRP1	AT5G12330	TATA-box	TATA	1446	4	-	Arabidopsis thaliana	core promoter element around -30 of transcription start
AtLRP1	AT5G12330	LAMP-element	CTTTATCA	1414	8	-	Pisum sativum	part of a light responsive element
AtLRP1	AT5G12330	TCT-motif	TCTTAC	549	6	+	Arabidopsis thaliana	part of a light responsive element
AtLRP1	AT5G12330	TCT-motif	TCTTAC	1102	6	-	Arabidopsis thaliana	part of a light responsive element
AtLRP1	AT5G12330	Unnamed__1	CGTGG	443	5	+	Zea mays
AtLRP1	AT5G12330	Unnamed__1	CGTGG	570	5	-	Zea mays
AtLRP1	AT5G12330	Unnamed__1	CGTGG	1375	5	-	Zea mays
AtLRP1	AT5G12330	CGTCA-motif	CGTCA	166	5	-	Hordeum vulgare	cis-acting regulatory element involved in the MeJA-responsiveness
AtLRP1	AT5G12330	CGTCA-motif	CGTCA	1407	5	+	Hordeum vulgare	cis-acting regulatory element involved in the MeJA-responsiveness
AtLRP1	AT5G12330	STRE	AGGGG	450	5	+	Arabidopsis thaliana
AtLRP1	AT5G12330	STRE	AGGGG	609	5	-	Arabidopsis thaliana
AtLRP1	AT5G12330	AT-rich element	ATAGAAATCAA	796	10	+	Glycine max	binding site of AT-rich DNA binding protein (ATBP-1)
AtLRP1	AT5G12330	AAGAA-motif	GAAAGAA	479	7	-	Avena sativa
AtLRP1	AT5G12330	MYB-like sequence	TAACCA	645	6	-	Arabidopsis thaliana
AtLRP1	AT5G12330	G-box	CACGTG	485	6	+	Arabidopsis thaliana	cis-acting regulatory element involved in light responsiveness
AtLRP1	AT5G12330	G-box	CCACGTAA	570	8	+	Brassica napus	cis-acting regulatory element involved in light responsiveness
AtLRP1	AT5G12330	G-box	TACGTG	571	6	-	Arabidopsis thaliana	cis-acting regulatory element involved in light responsiveness
AtLRP1	AT5G12330	AT~TATA-box	TATATAAA	524	8	-	Arabidopsis thaliana
AtLRP1	AT5G12330	AT~TATA-box	TATATA	526	6	+	Arabidopsis thaliana
AtLRP1	AT5G12330	AT~TATA-box	TATATAAA	1209	8	-	Arabidopsis thaliana
AtLRP1	AT5G12330	AT~TATA-box	TATATA	1211	6	-	Arabidopsis thaliana
AtLRP1	AT5G12330	F-box	CTATTCTCATT	506	10	+	Lycopersicon esculentum
AtLRP1	AT5G12330		motif_sequence	13	4	-	organism	short_function
AtLRP1	AT5G12330		motif_sequence	41	4	+	organism	short_function
AtLRP1	AT5G12330		motif_sequence	191	4	-	organism	short_function
AtLRP1	AT5G12330		motif_sequence	460	4	-	organism	short_function
AtLRP1	AT5G12330		motif_sequence	849	4	+	organism	short_function
AtLRP1	AT5G12330		motif_sequence	1061	4	+	organism	short_function
AtLRP1	AT5G12330		motif_sequence	1297	4	+	organism	short_function
AtLRP1	AT5G12330		motif_sequence	1309	4	+	organism	short_function
AtLRP1	AT5G12330		motif_sequence	1489	4	+	organism	short_function
AtLRP1	AT5G12330	chs-CMA1a	TTACTTAA	551	8	+	Daucus carota	part of a light responsive element
AtLRP1	AT5G12330	Unnamed__4	CTCC	43	4	+	Petroselinum hortense
AtLRP1	AT5G12330	Unnamed__4	CTCC	448	4	-	Petroselinum hortense
AtLRP1	AT5G12330	Unnamed__4	CTCC	924	4	+	Petroselinum hortense
AtLRP1	AT5G12330	Unnamed__4	CTCC	1333	4	-	Petroselinum hortense
AtLRP1	AT5G12330	Unnamed__4	CTCC	1345	4	-	Petroselinum hortense
AtLRP1	AT5G12330	Unnamed__4	CTCC	1371	4	-	Petroselinum hortense
AtLRP1	AT5G12330	Unnamed__4	CTCC	1474	4	-	Petroselinum hortense
AtLRP1	AT5G12330	circadian	CAAAGATATC	293	9	+	Lycopersicon esculentum	cis-acting regulatory element involved in circadian control
AtSRS3	AT2G21400	STRE	AGGGG	423	5	-	Arabidopsis thaliana
AtSRS3	AT2G21400	STRE	AGGGG	1230	5	-	Arabidopsis thaliana
AtSRS3	AT2G21400	MYB	TAACCA	159	6	-	Arabidopsis thaliana
AtSRS3	AT2G21400	MYB	TAACCA	950	6	+	Arabidopsis thaliana
AtSRS3	AT2G21400	MYB	TAACCA	1172	6	-	Arabidopsis thaliana
AtSRS3	AT2G21400	ERE	ATTTTAAA	8	8	+	Nicotiana glutinos
AtSRS3	AT2G21400	Unnamed__4	CTCC	426	4	+	Petroselinum hortense
AtSRS3	AT2G21400	Unnamed__4	CTCC	444	4	-	Petroselinum hortense
AtSRS3	AT2G21400	Unnamed__4	CTCC	1062	4	-	Petroselinum hortense
AtSRS3	AT2G21400	TATC-box	TATCCCA	991	7	-	Oryza sativa	cis-acting element involved in gibberellin-responsiveness
AtSRS3	AT2G21400	ARE	AAACCA	717	6	-	Zea mays	cis-acting regulatory element essential for the anaerobic induction
AtSRS3	AT2G21400	ARE	AAACCA	1208	6	+	Zea mays	cis-acting regulatory element essential for the anaerobic induction
AtSRS3	AT2G21400	A-box	CCGTCC	781	6	-	Petroselinum crispum	cis-acting regulatory element
AtSRS3	AT2G21400	CAAT-box	CAAT	20	4	-	Nicotiana glutinosa
AtSRS3	AT2G21400	CAAT-box	CAAT	59	4	-	Nicotiana glutinosa
AtSRS3	AT2G21400	CAAT-box	CAAAT	112	5	+	Pisum sativum	common cis-acting element in promoter and enhancer regions
AtSRS3	AT2G21400	CAAT-box	CCAAT	149	5	+	Arabidopsis thaliana	common cis-acting element in promoter and enhancer regions
AtSRS3	AT2G21400	CAAT-box	CAAT	150	4	+	Nicotiana glutinosa
AtSRS3	AT2G21400	CAAT-box	CAAAT	260	5	-	Pisum sativum	common cis-acting element in promoter and enhancer regions
AtSRS3	AT2G21400	CAAT-box	CAAAT	278	5	-	Pisum sativum	common cis-acting element in promoter and enhancer regions
AtSRS3	AT2G21400	CAAT-box	CAAAT	305	5	-	Pisum sativum	common cis-acting element in promoter and enhancer regions
AtSRS3	AT2G21400	CAAT-box	CAAT	529	4	+	Nicotiana glutinosa
AtSRS3	AT2G21400	CAAT-box	CAAAT	647	5	+	Pisum sativum	common cis-acting element in promoter and enhancer regions
AtSRS3	AT2G21400	CAAT-box	CAAT	787	4	-	Nicotiana glutinosa
AtSRS3	AT2G21400	CAAT-box	CAAAT	805	5	+	Pisum sativum	common cis-acting element in promoter and enhancer regions
AtSRS3	AT2G21400	CAAT-box	CAAAT	840	5	-	Pisum sativum	common cis-acting element in promoter and enhancer regions
AtSRS3	AT2G21400	CAAT-box	CAAT	848	4	+	Nicotiana glutinosa
AtSRS3	AT2G21400	CAAT-box	CAAT	871	4	+	Nicotiana glutinosa
AtSRS3	AT2G21400	CAAT-box	CAAAT	873	5	-	Pisum sativum	common cis-acting element in promoter and enhancer regions
AtSRS3	AT2G21400	CAAT-box	CAAT	906	4	+	Nicotiana glutinosa
AtSRS3	AT2G21400	CAAT-box	CAAAT	1236	5	+	Pisum sativum	common cis-acting element in promoter and enhancer regions
AtSRS3	AT2G21400	CAAT-box	CAAT	1275	4	-	Nicotiana glutinosa
AtSRS3	AT2G21400	CAAT-box	CAAT	1281	4	-	Nicotiana glutinosa
AtSRS3	AT2G21400	CAAT-box	CAAT	1299	4	-	Nicotiana glutinosa
AtSRS3	AT2G21400	CAAT-box	CCAAT	1336	5	+	Arabidopsis thaliana	common cis-acting element in promoter and enhancer regions
AtSRS3	AT2G21400	CAAT-box	CAAT	1337	4	+	Nicotiana glutinosa
AtSRS3	AT2G21400	CAAT-box	CAAAT	1341	5	+	Pisum sativum	common cis-acting element in promoter and enhancer regions
AtSRS3	AT2G21400	CAAT-box	CAAT	1370	4	+	Nicotiana glutinosa
AtSRS3	AT2G21400	CAAT-box	CAAT	1495	4	+	Nicotiana glutinosa
AtSRS3	AT2G21400	TC-rich repeats	ATTCTCTAAC	286	9	-	Nicotiana tabacum	cis-acting element involved in defense and stress responsiveness
AtSRS3	AT2G21400	MYB recognition site	CCGTTG	390	6	+	Arabidopsis thaliana
AtSRS3	AT2G21400	MYB recognition site	CCGTTG	1047	6	+	Arabidopsis thaliana
AtSRS3	AT2G21400	chs-CMA2a	TCACTTGA	605	8	+	Petroselinum crispum	part of a light responsive element
AtSRS3	AT2G21400	LTR	CCGAAA	1084	6	+	Hordeum vulgare	cis-acting element involved in low-temperature responsiveness
AtSRS3	AT2G21400	TATA-box	TATA	29	4	+	Arabidopsis thaliana	core promoter element around -30 of transcription start
AtSRS3	AT2G21400	TATA-box	TATAAAA	42	7	-	Pisum sativum	core promoter element around -30 of transcription start
AtSRS3	AT2G21400	TATA-box	TATAAA	43	6	-	Helianthus annuus	core promoter element around -30 of transcription start
AtSRS3	AT2G21400	TATA-box	TATAA	44	5	-	Arabidopsis thaliana	core promoter element around -30 of transcription start
AtSRS3	AT2G21400	TATA-box	TATA	45	4	+	Arabidopsis thaliana	core promoter element around -30 of transcription start
AtSRS3	AT2G21400	TATA-box	TATAA	119	5	-	Arabidopsis thaliana	core promoter element around -30 of transcription start
AtSRS3	AT2G21400	TATA-box	TATA	120	4	+	Arabidopsis thaliana	core promoter element around -30 of transcription start
AtSRS3	AT2G21400	TATA-box	TATATA	740	6	+	Arabidopsis thaliana	core promoter element around -30 of transcription start
AtSRS3	AT2G21400	TATA-box	ATATAT	741	6	+	Brassica napus	core promoter element around -30 of transcription start
AtSRS3	AT2G21400	TATA-box	TATATA	742	6	+	Arabidopsis thaliana	core promoter element around -30 of transcription start
AtSRS3	AT2G21400	TATA-box	TATA	744	4	+	Arabidopsis thaliana	core promoter element around -30 of transcription start
AtSRS3	AT2G21400	TATA-box	TATA	756	4	-	Arabidopsis thaliana	core promoter element around -30 of transcription start
AtSRS3	AT2G21400	TATA-box	TATAA	775	5	-	Arabidopsis thaliana	core promoter element around -30 of transcription start
AtSRS3	AT2G21400	TATA-box	TATA	776	4	-	Arabidopsis thaliana	core promoter element around -30 of transcription start
AtSRS3	AT2G21400	TATA-box	TACATAAA	818	8	-	Oryza sativa	core promoter element around -30 of transcription start
AtSRS3	AT2G21400	TATA-box	TACAAAA	833	7	+	Oryza sativa	core promoter element around -30 of transcription start
AtSRS3	AT2G21400	TATA-box	TATAAAT	859	7	-	Brassica juncea	core promoter element around -30 of transcription start
AtSRS3	AT2G21400	TATA-box	TATAAA	860	6	-	Helianthus annuus	core promoter element around -30 of transcription start
AtSRS3	AT2G21400	TATA-box	TATAA	861	5	-	Arabidopsis thaliana	core promoter element around -30 of transcription start
AtSRS3	AT2G21400	TATA-box	TATA	862	4	-	Arabidopsis thaliana	core promoter element around -30 of transcription start
AtSRS3	AT2G21400	TATA-box	TATAAAT	927	7	-	Brassica juncea	core promoter element around -30 of transcription start
AtSRS3	AT2G21400	TATA-box	TATAAA	928	6	-	Helianthus annuus	core promoter element around -30 of transcription start
AtSRS3	AT2G21400	TATA-box	TATAA	929	5	-	Arabidopsis thaliana	core promoter element around -30 of transcription start
AtSRS3	AT2G21400	TATA-box	TATA	930	4	-	Arabidopsis thaliana	core promoter element around -30 of transcription start
AtSRS3	AT2G21400	TATA-box	TATA	939	4	-	Arabidopsis thaliana	core promoter element around -30 of transcription start
AtSRS3	AT2G21400	TATA-box	ATATAA	947	6	+	Brassica oleracea	core promoter element around -30 of transcription start
AtSRS3	AT2G21400	TATA-box	TATA	948	4	-	Arabidopsis thaliana	core promoter element around -30 of transcription start
AtSRS3	AT2G21400	TATA-box	ATTATA	976	6	+	Brassica napus	core promoter element around -30 of transcription start
AtSRS3	AT2G21400	TATA-box	TATAA	977	5	-	Arabidopsis thaliana	core promoter element around -30 of transcription start
AtSRS3	AT2G21400	TATA-box	TATA	978	4	-	Arabidopsis thaliana	core promoter element around -30 of transcription start
AtSRS3	AT2G21400	TATA-box	TATA	1000	4	-	Arabidopsis thaliana	core promoter element around -30 of transcription start
AtSRS3	AT2G21400	TATA-box	TATA	1010	4	-	Arabidopsis thaliana	core promoter element around -30 of transcription start
AtSRS3	AT2G21400	TATA-box	TATA	1015	4	-	Arabidopsis thaliana	core promoter element around -30 of transcription start
AtSRS3	AT2G21400	TATA-box	TATAAAA	1020	7	-	Pisum sativum	core promoter element around -30 of transcription start
AtSRS3	AT2G21400	TATA-box	TATAAA	1021	6	-	Helianthus annuus	core promoter element around -30 of transcription start
AtSRS3	AT2G21400	TATA-box	TATAA	1022	5	-	Arabidopsis thaliana	core promoter element around -30 of transcription start
AtSRS3	AT2G21400	TATA-box	TATA	1023	4	-	Arabidopsis thaliana	core promoter element around -30 of transcription start
AtSRS3	AT2G21400	TATA-box	TATACA	1054	6	-	Helianthus annuus	core promoter element around -30 of transcription start
AtSRS3	AT2G21400	TATA-box	TATA	1056	4	-	Arabidopsis thaliana	core promoter element around -30 of transcription start
AtSRS3	AT2G21400	TATA-box	TATAA	1247	5	-	Arabidopsis thaliana	core promoter element around -30 of transcription start
AtSRS3	AT2G21400	TATA-box	TATA	1248	4	-	Arabidopsis thaliana	core promoter element around -30 of transcription start
AtSRS3	AT2G21400	TATA-box	ccTATAAAaa	1409	9	+	Arabidopsis thaliana	core promoter element around -30 of transcription start
AtSRS3	AT2G21400	TATA-box	TATA	1411	4	-	Arabidopsis thaliana	core promoter element around -30 of transcription start
AtSRS3	AT2G21400	TATA-box	TACAAAA	1439	7	-	Oryza sativa	core promoter element around -30 of transcription start
AtSRS3	AT2G21400	TATA-box	TACATAAA	1444	8	+	Oryza sativa	core promoter element around -30 of transcription start
AtSRS3	AT2G21400	MBS	CAACTG	88	6	-	Arabidopsis thaliana	MYB binding site involved in drought-inducibility
AtSRS3	AT2G21400	AC-I	GCTTACCTACCA	185	11	-	Arabidopsis thaliana
AtSRS3	AT2G21400	CCGTCC-box	CCGTCC	781	6	-	Petroselinum hortense
AtSRS3	AT2G21400	O2-site	GATGATGTGG	764	9	+	Zea mays	cis-acting regulatory element involved in zein metabolism regulation
AtSRS3	AT2G21400		motif_sequence	187	4	-	organism	short_function
AtSRS3	AT2G21400		motif_sequence	666	4	+	organism	short_function
AtSRS3	AT2G21400		motif_sequence	688	4	+	organism	short_function
AtSRS3	AT2G21400		motif_sequence	698	4	+	organism	short_function
AtSRS3	AT2G21400		motif_sequence	1443	4	-	organism	short_function
AtSRS3	AT2G21400		motif_sequence	1486	4	+	organism	short_function
AtSRS3	AT2G21400	TCA	TCATCTTCAT	968	9	+	Pisum sativum
AtSRS3	AT2G21400	DRE core	GCCGAC	901	6	+	Arabidopsis thaliana
AtSRS3	AT2G21400	AT~TATA-box	TATATA	740	6	+	Arabidopsis thaliana
AtSRS3	AT2G21400	AT~TATA-box	TATATA	742	6	+	Arabidopsis thaliana
AtSRS3	AT2G21400	WRE3	CCACCT	639	6	+	Pisum sativum
AtSRS3	AT2G21400	Myb	CAACTG	88	6	-	Arabidopsis thaliana
AtSRS3	AT2G21400	Myb	TAACTG	1381	6	-	Arabidopsis thaliana
AtSRS3	AT2G21400	GT1-motif	GGTTAA	1173	6	+	Arabidopsis thaliana	light responsive element
AtSRS3	AT2G21400	TATA	TATAAAAT	41	8	-	Arabidopsis thaliana
AtSRS3	AT2G21400	TATA	TATAAAAT	120	8	+	Arabidopsis thaliana
AtSRS3	AT2G21400	CCGTCC motif	CCGTCC	781	6	-	Nicotiana tabacum
AtSRS3	AT2G21400	MYC	CATTTG	304	6	+	Arabidopsis thaliana
AtSRS3	AT2G21400	MYB-like sequence	TAACCA	159	6	-	Arabidopsis thaliana
AtSRS3	AT2G21400	MYB-like sequence	TAACCA	950	6	+	Arabidopsis thaliana
AtSRS3	AT2G21400	MYB-like sequence	TAACCA	1172	6	-	Arabidopsis thaliana
AtSRS3	AT2G21400	CCAAT-box	CAACGG	390	6	-	Hordeum vulgare	MYBHv1 binding site
AtSRS3	AT2G21400	CCAAT-box	CAACGG	1047	6	-	Hordeum vulgare	MYBHv1 binding site
AtSRS4	AT2G18120	TATC-box	TATCCCA	963	7	+	Oryza sativa	cis-acting element involved in gibberellin-responsiveness
AtSRS4	AT2G18120	AT~TATA-box	TATATA	1	6	+	Arabidopsis thaliana
AtSRS4	AT2G18120	AT~TATA-box	TATATA	3	6	+	Arabidopsis thaliana
AtSRS4	AT2G18120	AT~TATA-box	TATATA	5	6	+	Arabidopsis thaliana
AtSRS4	AT2G18120	AT~TATA-box	TATATA	7	6	+	Arabidopsis thaliana
AtSRS4	AT2G18120	AT~TATA-box	TATATA	9	6	+	Arabidopsis thaliana
AtSRS4	AT2G18120	AT~TATA-box	TATATA	806	6	-	Arabidopsis thaliana
AtSRS4	AT2G18120	AT~TATA-box	TATATA	1063	6	-	Arabidopsis thaliana
AtSRS4	AT2G18120	AT~TATA-box	TATATAAA	1148	8	-	Arabidopsis thaliana
AtSRS4	AT2G18120	AT~TATA-box	TATATA	1150	6	-	Arabidopsis thaliana
AtSRS4	AT2G18120	AT~TATA-box	TATATA	1152	6	-	Arabidopsis thaliana
AtSRS4	AT2G18120	AT~TATA-box	TATATA	1154	6	-	Arabidopsis thaliana
AtSRS4	AT2G18120	Unnamed__4	CTCC	114	4	-	Petroselinum hortense
AtSRS4	AT2G18120	Unnamed__4	CTCC	246	4	-	Petroselinum hortense
AtSRS4	AT2G18120	Unnamed__4	CTCC	249	4	-	Petroselinum hortense
AtSRS4	AT2G18120	Unnamed__4	CTCC	252	4	-	Petroselinum hortense
AtSRS4	AT2G18120	Unnamed__4	CTCC	475	4	+	Petroselinum hortense
AtSRS4	AT2G18120	Unnamed__4	CTCC	720	4	-	Petroselinum hortense
AtSRS4	AT2G18120	Unnamed__4	CTCC	765	4	+	Petroselinum hortense
AtSRS4	AT2G18120	Unnamed__4	CTCC	984	4	-	Petroselinum hortense
AtSRS4	AT2G18120	STRE	AGGGG	1226	5	-	Arabidopsis thaliana
AtSRS4	AT2G18120	TATA-box	TATATA	1	6	+	Arabidopsis thaliana	core promoter element around -30 of transcription start
AtSRS4	AT2G18120	TATA-box	ATATAT	2	6	+	Brassica napus	core promoter element around -30 of transcription start
AtSRS4	AT2G18120	TATA-box	TATATA	3	6	+	Arabidopsis thaliana	core promoter element around -30 of transcription start
AtSRS4	AT2G18120	TATA-box	ATATAT	4	6	+	Brassica napus	core promoter element around -30 of transcription start
AtSRS4	AT2G18120	TATA-box	TATATA	5	6	+	Arabidopsis thaliana	core promoter element around -30 of transcription start
AtSRS4	AT2G18120	TATA-box	ATATAT	6	6	+	Brassica napus	core promoter element around -30 of transcription start
AtSRS4	AT2G18120	TATA-box	TATATA	7	6	+	Arabidopsis thaliana	core promoter element around -30 of transcription start
AtSRS4	AT2G18120	TATA-box	ATATAT	8	6	+	Brassica napus	core promoter element around -30 of transcription start
AtSRS4	AT2G18120	TATA-box	TATATA	9	6	+	Arabidopsis thaliana	core promoter element around -30 of transcription start
AtSRS4	AT2G18120	TATA-box	TATA	11	4	+	Arabidopsis thaliana	core promoter element around -30 of transcription start
AtSRS4	AT2G18120	TATA-box	TATTTAAA	385	8	+	Arabidopsis thaliana	core promoter element around -30 of transcription start
AtSRS4	AT2G18120	TATA-box	taTATAAAtc	401	9	-	Arabidopsis thaliana	core promoter element around -30 of transcription start
AtSRS4	AT2G18120	TATA-box	TATACA	481	6	-	Helianthus annuus	core promoter element around -30 of transcription start
AtSRS4	AT2G18120	TATA-box	TATA	483	4	+	Arabidopsis thaliana	core promoter element around -30 of transcription start
AtSRS4	AT2G18120	TATA-box	TACAAAA	497	7	+	Oryza sativa	core promoter element around -30 of transcription start
AtSRS4	AT2G18120	TATA-box	ATTATA	525	6	+	Brassica napus	core promoter element around -30 of transcription start
AtSRS4	AT2G18120	TATA-box	TATAA	526	5	-	Arabidopsis thaliana	core promoter element around -30 of transcription start
AtSRS4	AT2G18120	TATA-box	TATA	527	4	+	Arabidopsis thaliana	core promoter element around -30 of transcription start
AtSRS4	AT2G18120	TATA-box	TACAAAA	666	7	+	Oryza sativa	core promoter element around -30 of transcription start
AtSRS4	AT2G18120	TATA-box	TATA	673	4	+	Arabidopsis thaliana	core promoter element around -30 of transcription start
AtSRS4	AT2G18120	TATA-box	TACAAAA	675	7	+	Oryza sativa	core promoter element around -30 of transcription start
AtSRS4	AT2G18120	TATA-box	TATA	683	4	+	Arabidopsis thaliana	core promoter element around -30 of transcription start
AtSRS4	AT2G18120	TATA-box	ATATAA	699	6	+	Brassica oleracea	core promoter element around -30 of transcription start
AtSRS4	AT2G18120	TATA-box	TATA	700	4	+	Arabidopsis thaliana	core promoter element around -30 of transcription start
AtSRS4	AT2G18120	TATA-box	ATTATA	730	6	+	Brassica napus	core promoter element around -30 of transcription start
AtSRS4	AT2G18120	TATA-box	TATAA	731	5	-	Arabidopsis thaliana	core promoter element around -30 of transcription start
AtSRS4	AT2G18120	TATA-box	TATA	732	4	+	Arabidopsis thaliana	core promoter element around -30 of transcription start
AtSRS4	AT2G18120	TATA-box	TATATAA	805	7	-	Arabidopsis thaliana	core promoter element around -30 of transcription start
AtSRS4	AT2G18120	TATA-box	TATATA	806	6	-	Arabidopsis thaliana	core promoter element around -30 of transcription start
AtSRS4	AT2G18120	TATA-box	TATA	808	4	-	Arabidopsis thaliana	core promoter element around -30 of transcription start
AtSRS4	AT2G18120	TATA-box	TACAAAA	869	7	-	Oryza sativa	core promoter element around -30 of transcription start
AtSRS4	AT2G18120	TATA-box	TATATA	1063	6	-	Arabidopsis thaliana	core promoter element around -30 of transcription start
AtSRS4	AT2G18120	TATA-box	TATA	1065	4	-	Arabidopsis thaliana	core promoter element around -30 of transcription start
AtSRS4	AT2G18120	TATA-box	TATA	1070	4	-	Arabidopsis thaliana	core promoter element around -30 of transcription start
AtSRS4	AT2G18120	TATA-box	taTATAAAtc	1146	9	-	Arabidopsis thaliana	core promoter element around -30 of transcription start
AtSRS4	AT2G18120	TATA-box	TATAAAT	1147	7	-	Brassica juncea	core promoter element around -30 of transcription start
AtSRS4	AT2G18120	TATA-box	TATAAA	1148	6	-	Helianthus annuus	core promoter element around -30 of transcription start
AtSRS4	AT2G18120	TATA-box	TATATAA	1149	7	-	Arabidopsis thaliana	core promoter element around -30 of transcription start
AtSRS4	AT2G18120	TATA-box	TATATA	1150	6	-	Arabidopsis thaliana	core promoter element around -30 of transcription start
AtSRS4	AT2G18120	TATA-box	ATATAT	1151	6	-	Brassica napus	core promoter element around -30 of transcription start
AtSRS4	AT2G18120	TATA-box	TATATA	1152	6	-	Arabidopsis thaliana	core promoter element around -30 of transcription start
AtSRS4	AT2G18120	TATA-box	ATATAT	1153	6	-	Brassica napus	core promoter element around -30 of transcription start
AtSRS4	AT2G18120	TATA-box	TATATA	1154	6	-	Arabidopsis thaliana	core promoter element around -30 of transcription start
AtSRS4	AT2G18120	TATA-box	ATATAT	1155	6	-	Brassica napus	core promoter element around -30 of transcription start
AtSRS4	AT2G18120	TATA-box	TATA	1156	4	-	Arabidopsis thaliana	core promoter element around -30 of transcription start
AtSRS4	AT2G18120	TATA-box	TATA	1183	4	-	Arabidopsis thaliana	core promoter element around -30 of transcription start
AtSRS4	AT2G18120	TATA-box	ATTATA	1195	6	+	Brassica napus	core promoter element around -30 of transcription start
AtSRS4	AT2G18120	TATA-box	TATAA	1196	5	-	Arabidopsis thaliana	core promoter element around -30 of transcription start
AtSRS4	AT2G18120	TATA-box	TATA	1197	4	-	Arabidopsis thaliana	core promoter element around -30 of transcription start
AtSRS4	AT2G18120	TATA-box	ATTATA	1299	6	+	Brassica napus	core promoter element around -30 of transcription start
AtSRS4	AT2G18120	TATA-box	TATAA	1300	5	-	Arabidopsis thaliana	core promoter element around -30 of transcription start
AtSRS4	AT2G18120	TATA-box	TATA	1301	4	-	Arabidopsis thaliana	core promoter element around -30 of transcription start
AtSRS4	AT2G18120	TATA-box	TATAAAT	1356	7	-	Brassica juncea	core promoter element around -30 of transcription start
AtSRS4	AT2G18120	TATA-box	TATAAA	1357	6	-	Helianthus annuus	core promoter element around -30 of transcription start
AtSRS4	AT2G18120	TATA-box	TATAA	1358	5	-	Arabidopsis thaliana	core promoter element around -30 of transcription start
AtSRS4	AT2G18120	TATA-box	TATA	1359	4	-	Arabidopsis thaliana	core promoter element around -30 of transcription start
AtSRS4	AT2G18120	TATA-box	TATA	1496	4	-	Arabidopsis thaliana	core promoter element around -30 of transcription start
AtSRS4	AT2G18120	WUN-motif	AAATTACTA	771	9	+	Nicotiana glutinosa
AtSRS4	AT2G18120	WRE3	CCACCT	1031	6	-	Pisum sativum
AtSRS4	AT2G18120	Unnamed__1	CGTGG	1483	5	-	Zea mays
AtSRS4	AT2G18120	P-box	CCTTTTG	135	7	+	Oryza sativa	gibberellin-responsive element
AtSRS4	AT2G18120	G-Box	CACGTG	1484	6	-	Pisum sativum	cis-acting regulatory element involved in light responsiveness
AtSRS4	AT2G18120	CAT-box	GCCACT	1056	6	+	Arabidopsis thaliana	cis-acting regulatory element related to meristem expression
AtSRS4	AT2G18120	ABRE	GACACGTACGT	1020	10	+	Oryza sativa	cis-acting element involved in the abscisic acid responsiveness
AtSRS4	AT2G18120	ABRE	TACGGTC	1361	7	+	Arabidopsis thaliana	cis-acting element involved in the abscisic acid responsiveness
AtSRS4	AT2G18120	ABRE	GACACGTGGC	1482	9	-	Triticum aestivum	cis-acting element involved in the abscisic acid responsiveness
AtSRS4	AT2G18120	ABRE	CACGTG	1484	6	-	Arabidopsis thaliana	cis-acting element involved in the abscisic acid responsiveness
AtSRS4	AT2G18120	ABRE	ACGTG	1485	5	+	Arabidopsis thaliana	cis-acting element involved in the abscisic acid responsiveness
AtSRS4	AT2G18120	RY-element	CATGCATG	1092	8	-	Helianthus annuus	cis-acting regulatory element involved in seed-specific regulation
AtSRS4	AT2G18120	RY-element	CATGCATG	1282	8	-	Helianthus annuus	cis-acting regulatory element involved in seed-specific regulation
AtSRS4	AT2G18120	ERE	ATTTTAAA	835	8	+	Nicotiana glutinos
AtSRS4	AT2G18120	ERE	ATTTTAAA	1126	8	-	Nicotiana glutinos
AtSRS4	AT2G18120	MRE	AACCTAA	377	7	-	Petroselinum crispum	MYB binding site involved in light responsiveness
AtSRS4	AT2G18120	ARE	AAACCA	883	6	-	Zea mays	cis-acting regulatory element essential for the anaerobic induction
AtSRS4	AT2G18120	ARE	AAACCA	1409	6	+	Zea mays	cis-acting regulatory element essential for the anaerobic induction
AtSRS4	AT2G18120		motif_sequence	150	4	-	organism	short_function
AtSRS4	AT2G18120		motif_sequence	163	4	-	organism	short_function
AtSRS4	AT2G18120		motif_sequence	208	4	-	organism	short_function
AtSRS4	AT2G18120		motif_sequence	345	4	-	organism	short_function
AtSRS4	AT2G18120		motif_sequence	473	4	+	organism	short_function
AtSRS4	AT2G18120		motif_sequence	610	4	+	organism	short_function
AtSRS4	AT2G18120		motif_sequence	720	4	-	organism	short_function
AtSRS4	AT2G18120		motif_sequence	878	4	-	organism	short_function
AtSRS4	AT2G18120		motif_sequence	937	4	-	organism	short_function
AtSRS4	AT2G18120		motif_sequence	1041	4	+	organism	short_function
AtSRS4	AT2G18120		motif_sequence	1121	4	-	organism	short_function
AtSRS4	AT2G18120		motif_sequence	1287	4	+	organism	short_function
AtSRS4	AT2G18120	AE-box	AGAAACAA	644	8	+	Arabidopsis thaliana	part of a module for light response
AtSRS4	AT2G18120	I-box	gGATAAGGTG	755	9	-	Zea mays	part of a light responsive element
AtSRS4	AT2G18120	Myc	TCTCTTA	1213	7	-	Arabidopsis thaliana
AtSRS4	AT2G18120	G-box	GCCACGTGGA	1482	9	-	Arabidopsis thaliana	cis-acting regulatory element involved in light responsiveness
AtSRS4	AT2G18120	G-box	CACGTG	1484	6	-	Arabidopsis thaliana	cis-acting regulatory element involved in light responsiveness
AtSRS4	AT2G18120	W box	TTGACC	1470	6	-	Arabidopsis thaliana
AtSRS4	AT2G18120	CAAT-box	CAAT	44	4	-	Nicotiana glutinosa
AtSRS4	AT2G18120	CAAT-box	CAAT	205	4	-	Nicotiana glutinosa
AtSRS4	AT2G18120	CAAT-box	CAAAT	217	5	-	Pisum sativum	common cis-acting element in promoter and enhancer regions
AtSRS4	AT2G18120	CAAT-box	CAAAT	275	5	-	Pisum sativum	common cis-acting element in promoter and enhancer regions
AtSRS4	AT2G18120	CAAT-box	CCAAT	349	5	-	Arabidopsis thaliana	common cis-acting element in promoter and enhancer regions
AtSRS4	AT2G18120	CAAT-box	CAAT	392	4	-	Nicotiana glutinosa
AtSRS4	AT2G18120	CAAT-box	CAAT	551	4	+	Nicotiana glutinosa
AtSRS4	AT2G18120	CAAT-box	CAAAT	561	5	-	Pisum sativum	common cis-acting element in promoter and enhancer regions
AtSRS4	AT2G18120	CAAT-box	CAAAT	787	5	+	Pisum sativum	common cis-acting element in promoter and enhancer regions
AtSRS4	AT2G18120	CAAT-box	CAAT	970	4	+	Nicotiana glutinosa
AtSRS4	AT2G18120	CAAT-box	CAAT	1039	4	+	Nicotiana glutinosa
AtSRS4	AT2G18120	CAAT-box	CAAAT	1079	5	+	Pisum sativum	common cis-acting element in promoter and enhancer regions
AtSRS4	AT2G18120	CAAT-box	CAAT	1234	4	+	Nicotiana glutinosa
AtSRS4	AT2G18120	CAAT-box	CAAT	1275	4	-	Nicotiana glutinosa
AtSRS4	AT2G18120	CAAT-box	CAAAT	1332	5	+	Pisum sativum	common cis-acting element in promoter and enhancer regions
AtSRS4	AT2G18120	CAAT-box	CAAT	1388	4	-	Nicotiana glutinosa
AtSRS4	AT2G18120	CAAT-box	CAAAT	1392	5	+	Pisum sativum	common cis-acting element in promoter and enhancer regions
AtSRS4	AT2G18120	CAAT-box	CAAT	1422	4	-	Nicotiana glutinosa
AtSRS4	AT2G18120	CAAT-box	CCAAT	1441	5	-	Arabidopsis thaliana	common cis-acting element in promoter and enhancer regions
AtSRS4	AT2G18120	CAAT-box	CAAAT	1473	5	+	Pisum sativum	common cis-acting element in promoter and enhancer regions
AtSRS4	AT2G18120	AT-rich element	ATAGAAATCAA	277	10	-	Glycine max	binding site of AT-rich DNA binding protein (ATBP-1)
AtSRS4	AT2G18120	GATA-motif	AAGGATAAGG	757	9	-	Solanum tuberosum	part of a light responsive element
AtSRS4	AT2G18120	Box 4	ATTAAT	1170	6	-	Petroselinum crispum	part of a conserved DNA module involved in light responsiveness
AtSRS4	AT2G18120	MYB	CAACCA	91	6	+	Arabidopsis thaliana
AtSRS4	AT2G18120	MYB	CAACCA	220	6	-	Arabidopsis thaliana
AtSRS4	AT2G18120	MYB	CAACCA	1249	6	+	Arabidopsis thaliana
AtSRS4	AT2G18120	MYB	CAACCA	1312	6	+	Arabidopsis thaliana
AtSRS4	AT2G18120	AAGAA-motif	GAAAGAA	918	7	+	Avena sativa
AtSRS4	AT2G18120	AAGAA-motif	gGTAAAGAAA	1371	9	-	Avena sativa
AtSRS4	AT2G18120	MYC	CATGTG	1286	6	+	Arabidopsis thaliana
AtSRS5	AT1G75520	F-box	CTATTCTCATT	134	10	+	Lycopersicon esculentum
AtSRS5	AT1G75520	ABRE	ACGTG	46	5	+	Arabidopsis thaliana	cis-acting element involved in the abscisic acid responsiveness
AtSRS5	AT1G75520	ABRE	ACGTG	275	5	+	Arabidopsis thaliana	cis-acting element involved in the abscisic acid responsiveness
AtSRS5	AT1G75520	ABRE	ACGTG	628	5	-	Arabidopsis thaliana	cis-acting element involved in the abscisic acid responsiveness
AtSRS5	AT1G75520	ABRE	GACACGTGGC	998	9	+	Triticum aestivum	cis-acting element involved in the abscisic acid responsiveness
AtSRS5	AT1G75520	ABRE	CACGTG	1000	6	-	Arabidopsis thaliana	cis-acting element involved in the abscisic acid responsiveness
AtSRS5	AT1G75520	ABRE	ACGTG	1001	5	+	Arabidopsis thaliana	cis-acting element involved in the abscisic acid responsiveness
AtSRS5	AT1G75520	GC-motif	CCCCCG	962	6	-	Zea mays	enhancer-like element involved in anoxic specific inducibility
AtSRS5	AT1G75520	CCGTCC-box	CCGTCC	762	6	+	Petroselinum hortense
AtSRS5	AT1G75520	TC-rich repeats	GTTTTCTTAC	552	9	+	Nicotiana tabacum	cis-acting element involved in defense and stress responsiveness
AtSRS5	AT1G75520	CGTCA-motif	CGTCA	769	5	-	Hordeum vulgare	cis-acting regulatory element involved in the MeJA-responsiveness
AtSRS5	AT1G75520	CGTCA-motif	CGTCA	793	5	-	Hordeum vulgare	cis-acting regulatory element involved in the MeJA-responsiveness
AtSRS5	AT1G75520	CGTCA-motif	CGTCA	1312	5	+	Hordeum vulgare	cis-acting regulatory element involved in the MeJA-responsiveness
AtSRS5	AT1G75520	TCT-motif	TCTTAC	1331	6	+	Arabidopsis thaliana	part of a light responsive element
AtSRS5	AT1G75520	GT1-motif	GTGTGTGAA	537	9	-	Solanum tuberosum	light responsive element
AtSRS5	AT1G75520	A-box	CCGTCC	762	6	+	Petroselinum crispum	cis-acting regulatory element
AtSRS5	AT1G75520	HD-Zip 3	GTAAT(G/C)ATTAC	1421	9.5	-	Arabidopsis thaliana	protein binding site
AtSRS5	AT1G75520		motif_sequence	24	4	-	organism	short_function
AtSRS5	AT1G75520		motif_sequence	32	4	+	organism	short_function
AtSRS5	AT1G75520		motif_sequence	122	4	+	organism	short_function
AtSRS5	AT1G75520		motif_sequence	164	4	-	organism	short_function
AtSRS5	AT1G75520		motif_sequence	483	4	+	organism	short_function
AtSRS5	AT1G75520		motif_sequence	601	4	+	organism	short_function
AtSRS5	AT1G75520		motif_sequence	991	4	+	organism	short_function
AtSRS5	AT1G75520		motif_sequence	1144	4	+	organism	short_function
AtSRS5	AT1G75520		motif_sequence	1387	4	-	organism	short_function
AtSRS5	AT1G75520	AE-box	AGAAACTT	584	8	-	Arabidopsis thaliana	part of a module for light response
AtSRS5	AT1G75520	AE-box	AGAAACAA	1087	8	+	Arabidopsis thaliana	part of a module for light response
AtSRS5	AT1G75520	MBSI	aaaAaaC(G/C)GTTA	111	10.5	-	Petunia hybrida	MYB binding site involved in flavonoid biosynthetic genes regulation
AtSRS5	AT1G75520	G-box	TACGTG	45	6	+	Arabidopsis thaliana	cis-acting regulatory element involved in light responsiveness
AtSRS5	AT1G75520	G-box	TACGTG	628	6	-	Arabidopsis thaliana	cis-acting regulatory element involved in light responsiveness
AtSRS5	AT1G75520	G-box	TAACACGTAG	997	9	+	Brassica oleracea	cis-acting regulatory element involved in light responsiveness
AtSRS5	AT1G75520	G-box	ACACGTGGC	999	9	+	Brassica napus	cis-acting regulatory element involved in light responsiveness
AtSRS5	AT1G75520	G-box	CACGTG	1000	6	-	Arabidopsis thaliana	cis-acting regulatory element involved in light responsiveness
AtSRS5	AT1G75520	Box 4	ATTAAT	81	6	+	Petroselinum crispum	part of a conserved DNA module involved in light responsiveness
AtSRS5	AT1G75520	Box 4	ATTAAT	1341	6	-	Petroselinum crispum	part of a conserved DNA module involved in light responsiveness
AtSRS5	AT1G75520	Box 4	ATTAAT	1410	6	-	Petroselinum crispum	part of a conserved DNA module involved in light responsiveness
AtSRS5	AT1G75520	DRE core	GCCGAC	436	6	-	Arabidopsis thaliana
AtSRS5	AT1G75520	TGA-element	AACGAC	695	6	-	Brassica oleracea	auxin-responsive element
AtSRS5	AT1G75520	Unnamed__1	CGTGG	627	5	-	Zea mays
AtSRS5	AT1G75520	Unnamed__1	CGTGG	1002	5	+	Zea mays
AtSRS5	AT1G75520	CAAT-box	CCAAT	40	5	+	Arabidopsis thaliana	common cis-acting element in promoter and enhancer regions
AtSRS5	AT1G75520	CAAT-box	CAAT	41	4	+	Nicotiana glutinosa
AtSRS5	AT1G75520	CAAT-box	CAAT	151	4	+	Nicotiana glutinosa
AtSRS5	AT1G75520	CAAT-box	CAAAT	183	5	-	Pisum sativum	common cis-acting element in promoter and enhancer regions
AtSRS5	AT1G75520	CAAT-box	CAAAT	249	5	-	Pisum sativum	common cis-acting element in promoter and enhancer regions
AtSRS5	AT1G75520	CAAT-box	CCAAT	301	5	-	Arabidopsis thaliana	common cis-acting element in promoter and enhancer regions
AtSRS5	AT1G75520	CAAT-box	CAAT	616	4	+	Nicotiana glutinosa
AtSRS5	AT1G75520	CAAT-box	CAAT	715	4	-	Nicotiana glutinosa
AtSRS5	AT1G75520	CAAT-box	CAAT	1020	4	-	Nicotiana glutinosa
AtSRS5	AT1G75520	CAAT-box	CAAT	1223	4	-	Nicotiana glutinosa
AtSRS5	AT1G75520	CAAT-box	CAAAT	1260	5	-	Pisum sativum	common cis-acting element in promoter and enhancer regions
AtSRS5	AT1G75520	CAAT-box	CAAT	1350	4	-	Nicotiana glutinosa
AtSRS5	AT1G75520	ABRE4	CACGTA	45	6	-	Zea mays
AtSRS5	AT1G75520	ABRE4	CACGTA	628	6	+	Zea mays
AtSRS5	AT1G75520	ABRE3a	TACGTG	45	6	+	Zea mays
AtSRS5	AT1G75520	ABRE3a	TACGTG	628	6	-	Zea mays
AtSRS5	AT1G75520	Unnamed__4	CTCC	951	4	-	Petroselinum hortense
AtSRS5	AT1G75520	Unnamed__4	CTCC	966	4	-	Petroselinum hortense
AtSRS5	AT1G75520	Unnamed__4	CTCC	978	4	-	Petroselinum hortense
AtSRS5	AT1G75520	Unnamed__4	CTCC	987	4	+	Petroselinum hortense
AtSRS5	AT1G75520	Unnamed__4	CTCC	1210	4	+	Petroselinum hortense
AtSRS5	AT1G75520	G-Box	CACGTT	274	6	-	Pisum sativum	cis-acting regulatory element involved in light responsiveness
AtSRS5	AT1G75520	G-Box	CACGTG	1000	6	-	Pisum sativum	cis-acting regulatory element involved in light responsiveness
AtSRS5	AT1G75520	ERE	ATTTTAAA	13	8	+	Nicotiana glutinos
AtSRS5	AT1G75520	ERE	ATTTTAAA	1138	8	-	Nicotiana glutinos
AtSRS5	AT1G75520	AAGAA-motif	gGTAAAGAAA	1296	9	+	Avena sativa
AtSRS5	AT1G75520	WUN-motif	AAATTTCTT	1105	9	-	Nicotiana glutinosa
AtSRS5	AT1G75520	WUN-motif	AAATTTCTT	1108	9	+	Nicotiana glutinosa
AtSRS5	AT1G75520	WUN-motif	AAATTACT	1439	8	+	Nicotiana glutinosa
AtSRS5	AT1G75520	chs-CMA1a	TTACTTAA	1442	8	+	Daucus carota	part of a light responsive element
AtSRS5	AT1G75520	TATA	TATAAAAT	55	8	+	Arabidopsis thaliana
AtSRS5	AT1G75520	TATA	TATAAAAT	1202	8	-	Arabidopsis thaliana
AtSRS5	AT1G75520	GA-motif	ATAGATAA	918	8	+	Arabidopsis thaliana	part of a light responsive element
AtSRS5	AT1G75520	as-1	TGACG	769	5	+	Arabidopsis thaliana
AtSRS5	AT1G75520	as-1	TGACG	793	5	+	Arabidopsis thaliana
AtSRS5	AT1G75520	as-1	TGACG	1312	5	-	Arabidopsis thaliana
AtSRS5	AT1G75520	TGACG-motif	TGACG	769	5	+	Hordeum vulgare	cis-acting regulatory element involved in the MeJA-responsiveness
AtSRS5	AT1G75520	TGACG-motif	TGACG	793	5	+	Hordeum vulgare	cis-acting regulatory element involved in the MeJA-responsiveness
AtSRS5	AT1G75520	TGACG-motif	TGACG	1312	5	-	Hordeum vulgare	cis-acting regulatory element involved in the MeJA-responsiveness
AtSRS5	AT1G75520	ARE	AAACCA	104	6	+	Zea mays	cis-acting regulatory element essential for the anaerobic induction
AtSRS5	AT1G75520	ARE	AAACCA	508	6	+	Zea mays	cis-acting regulatory element essential for the anaerobic induction
AtSRS5	AT1G75520	ARE	AAACCA	1239	6	+	Zea mays	cis-acting regulatory element essential for the anaerobic induction
AtSRS5	AT1G75520	CCGTCC motif	CCGTCC	762	6	+	Nicotiana tabacum
AtSRS5	AT1G75520	AT~TATA-box	TATATA	233	6	+	Arabidopsis thaliana
AtSRS5	AT1G75520	AT~TATA-box	TATATA	258	6	+	Arabidopsis thaliana
AtSRS5	AT1G75520	AT~TATA-box	TATATA	899	6	-	Arabidopsis thaliana
AtSRS5	AT1G75520	AT~TATA-box	TATATA	1254	6	-	Arabidopsis thaliana
AtSRS5	AT1G75520	AT~TATA-box	TATATA	1401	6	-	Arabidopsis thaliana
AtSRS5	AT1G75520	Unnamed__6	taTAAATATct	166	10	-	Zea mays
AtSRS5	AT1G75520	TATA-box	taTATAAAtc	27	9	-	Arabidopsis thaliana	core promoter element around -30 of transcription start
AtSRS5	AT1G75520	TATA-box	TACATAAA	29	8	-	Oryza sativa	core promoter element around -30 of transcription start
AtSRS5	AT1G75520	TATA-box	TATA	55	4	+	Arabidopsis thaliana	core promoter element around -30 of transcription start
AtSRS5	AT1G75520	TATA-box	TATA	77	4	+	Arabidopsis thaliana	core promoter element around -30 of transcription start
AtSRS5	AT1G75520	TATA-box	TACATAAA	119	8	-	Oryza sativa	core promoter element around -30 of transcription start
AtSRS5	AT1G75520	TATA-box	TATAAATA	169	8	-	Daucus carota	core promoter element around -30 of transcription start
AtSRS5	AT1G75520	TATA-box	TATAAAT	170	7	-	Brassica juncea	core promoter element around -30 of transcription start
AtSRS5	AT1G75520	TATA-box	TATAAA	171	6	-	Helianthus annuus	core promoter element around -30 of transcription start
AtSRS5	AT1G75520	TATA-box	TATAA	172	5	-	Arabidopsis thaliana	core promoter element around -30 of transcription start
AtSRS5	AT1G75520	TATA-box	TATA	173	4	+	Arabidopsis thaliana	core promoter element around -30 of transcription start
AtSRS5	AT1G75520	TATA-box	TATATAA	232	7	-	Arabidopsis thaliana	core promoter element around -30 of transcription start
AtSRS5	AT1G75520	TATA-box	TATATA	233	6	+	Arabidopsis thaliana	core promoter element around -30 of transcription start
AtSRS5	AT1G75520	TATA-box	ATATAT	234	6	+	Brassica napus	core promoter element around -30 of transcription start
AtSRS5	AT1G75520	TATA-box	TATA	235	4	+	Arabidopsis thaliana	core promoter element around -30 of transcription start
AtSRS5	AT1G75520	TATA-box	TATATA	258	6	+	Arabidopsis thaliana	core promoter element around -30 of transcription start
AtSRS5	AT1G75520	TATA-box	TATA	260	4	+	Arabidopsis thaliana	core promoter element around -30 of transcription start
AtSRS5	AT1G75520	TATA-box	ccTATAAAaa	319	9	+	Arabidopsis thaliana	core promoter element around -30 of transcription start
AtSRS5	AT1G75520	TATA-box	ATTATA	384	6	+	Brassica napus	core promoter element around -30 of transcription start
AtSRS5	AT1G75520	TATA-box	TATAA	385	5	-	Arabidopsis thaliana	core promoter element around -30 of transcription start
AtSRS5	AT1G75520	TATA-box	TATA	386	4	+	Arabidopsis thaliana	core promoter element around -30 of transcription start
AtSRS5	AT1G75520	TATA-box	TATAAGAA	555	8	-	Zea mays	core promoter element around -30 of transcription start
AtSRS5	AT1G75520	TATA-box	TATAA	558	5	-	Arabidopsis thaliana	core promoter element around -30 of transcription start
AtSRS5	AT1G75520	TATA-box	TATA	559	4	+	Arabidopsis thaliana	core promoter element around -30 of transcription start
AtSRS5	AT1G75520	TATA-box	ATATAT	898	6	-	Brassica napus	core promoter element around -30 of transcription start
AtSRS5	AT1G75520	TATA-box	TATATA	899	6	-	Arabidopsis thaliana	core promoter element around -30 of transcription start
AtSRS5	AT1G75520	TATA-box	ATATAA	900	6	+	Brassica oleracea	core promoter element around -30 of transcription start
AtSRS5	AT1G75520	TATA-box	TATA	901	4	-	Arabidopsis thaliana	core promoter element around -30 of transcription start
AtSRS5	AT1G75520	TATA-box	ATATAT	1198	6	-	Brassica napus	core promoter element around -30 of transcription start
AtSRS5	AT1G75520	TATA-box	TATA	1199	4	-	Arabidopsis thaliana	core promoter element around -30 of transcription start
AtSRS5	AT1G75520	TATA-box	TATAAAA	1203	7	-	Pisum sativum	core promoter element around -30 of transcription start
AtSRS5	AT1G75520	TATA-box	TATAAA	1204	6	-	Helianthus annuus	core promoter element around -30 of transcription start
AtSRS5	AT1G75520	TATA-box	TATAA	1205	5	-	Arabidopsis thaliana	core promoter element around -30 of transcription start
AtSRS5	AT1G75520	TATA-box	TATA	1206	4	-	Arabidopsis thaliana	core promoter element around -30 of transcription start
AtSRS5	AT1G75520	TATA-box	ATATAT	1253	6	-	Brassica napus	core promoter element around -30 of transcription start
AtSRS5	AT1G75520	TATA-box	TATATA	1254	6	-	Arabidopsis thaliana	core promoter element around -30 of transcription start
AtSRS5	AT1G75520	TATA-box	ATATAA	1255	6	+	Brassica oleracea	core promoter element around -30 of transcription start
AtSRS5	AT1G75520	TATA-box	TATA	1256	4	-	Arabidopsis thaliana	core promoter element around -30 of transcription start
AtSRS5	AT1G75520	TATA-box	ccTATAAAaa	1375	9	+	Arabidopsis thaliana	core promoter element around -30 of transcription start
AtSRS5	AT1G75520	TATA-box	ATATAT	1400	6	-	Brassica napus	core promoter element around -30 of transcription start
AtSRS5	AT1G75520	TATA-box	TATATA	1401	6	-	Arabidopsis thaliana	core promoter element around -30 of transcription start
AtSRS5	AT1G75520	TATA-box	TATA	1403	4	-	Arabidopsis thaliana	core promoter element around -30 of transcription start
AtSRS6	AT3G54430	LTR	CCGAAA	651	6	+	Hordeum vulgare	cis-acting element involved in low-temperature responsiveness
AtSRS6	AT3G54430	LTR	CCGAAA	765	6	+	Hordeum vulgare	cis-acting element involved in low-temperature responsiveness
AtSRS6	AT3G54430	LAMP-element	CTTTATCA	300	8	-	Pisum sativum	part of a light responsive element
AtSRS6	AT3G54430	TCA	TCATCTTCAT	872	9	-	Pisum sativum
AtSRS6	AT3G54430	STRE	AGGGG	1218	5	-	Arabidopsis thaliana
AtSRS6	AT3G54430	ATC-motif	AGTAATCT	909	8	+	Spinacia oleracea	part of a conserved DNA module involved in light responsiveness
AtSRS6	AT3G54430	G-box	CACGTG	566	6	+	Arabidopsis thaliana	cis-acting regulatory element involved in light responsiveness
AtSRS6	AT3G54430	TCA-element	CCATCTTTTT	770	9	-	Nicotiana tabacum	cis-acting element involved in salicylic acid responsiveness
AtSRS6	AT3G54430	RY-element	CATGCATG	699	8	+	Helianthus annuus	cis-acting regulatory element involved in seed-specific regulation
AtSRS6	AT3G54430	Unnamed__4	CTCC	241	4	-	Petroselinum hortense
AtSRS6	AT3G54430	Unnamed__4	CTCC	247	4	+	Petroselinum hortense
AtSRS6	AT3G54430	Unnamed__4	CTCC	310	4	-	Petroselinum hortense
AtSRS6	AT3G54430	Unnamed__4	CTCC	363	4	-	Petroselinum hortense
AtSRS6	AT3G54430	Unnamed__4	CTCC	511	4	-	Petroselinum hortense
AtSRS6	AT3G54430	Unnamed__4	CTCC	694	4	-	Petroselinum hortense
AtSRS6	AT3G54430	Unnamed__4	CTCC	724	4	-	Petroselinum hortense
AtSRS6	AT3G54430	Unnamed__4	CTCC	733	4	-	Petroselinum hortense
AtSRS6	AT3G54430	Unnamed__4	CTCC	1090	4	-	Petroselinum hortense
AtSRS6	AT3G54430	Unnamed__4	CTCC	1106	4	+	Petroselinum hortense
AtSRS6	AT3G54430	Unnamed__4	CTCC	1216	4	+	Petroselinum hortense
AtSRS6	AT3G54430	MBS	CAACTG	1002	6	-	Arabidopsis thaliana	MYB binding site involved in drought-inducibility
AtSRS6	AT3G54430	ABRE	CACGTG	566	6	+	Arabidopsis thaliana	cis-acting element involved in the abscisic acid responsiveness
AtSRS6	AT3G54430	ABRE	ACGTG	567	5	+	Arabidopsis thaliana	cis-acting element involved in the abscisic acid responsiveness
AtSRS6	AT3G54430		motif_sequence	25	4	-	organism	short_function
AtSRS6	AT3G54430		motif_sequence	134	4	-	organism	short_function
AtSRS6	AT3G54430		motif_sequence	205	4	+	organism	short_function
AtSRS6	AT3G54430		motif_sequence	346	4	-	organism	short_function
AtSRS6	AT3G54430		motif_sequence	381	4	+	organism	short_function
AtSRS6	AT3G54430		motif_sequence	412	4	-	organism	short_function
AtSRS6	AT3G54430		motif_sequence	453	4	+	organism	short_function
AtSRS6	AT3G54430		motif_sequence	511	4	-	organism	short_function
AtSRS6	AT3G54430		motif_sequence	551	4	+	organism	short_function
AtSRS6	AT3G54430		motif_sequence	704	4	+	organism	short_function
AtSRS6	AT3G54430		motif_sequence	740	4	-	organism	short_function
AtSRS6	AT3G54430		motif_sequence	810	4	+	organism	short_function
AtSRS6	AT3G54430		motif_sequence	874	4	-	organism	short_function
AtSRS6	AT3G54430		motif_sequence	1090	4	-	organism	short_function
AtSRS6	AT3G54430		motif_sequence	1141	4	-	organism	short_function
AtSRS6	AT3G54430		motif_sequence	1197	4	-	organism	short_function
AtSRS6	AT3G54430		motif_sequence	1201	4	+	organism	short_function
AtSRS6	AT3G54430		motif_sequence	1232	4	+	organism	short_function
AtSRS6	AT3G54430		motif_sequence	1354	4	+	organism	short_function
AtSRS6	AT3G54430		motif_sequence	1374	4	+	organism	short_function
AtSRS6	AT3G54430	O2-site	GATGATGTGG	355	9	+	Zea mays	cis-acting regulatory element involved in zein metabolism regulation
AtSRS6	AT3G54430	Myb	TAACTG	349	6	-	Arabidopsis thaliana
AtSRS6	AT3G54430	Myb	CAACTG	1002	6	-	Arabidopsis thaliana
AtSRS6	AT3G54430	AuxRR-core	GGTCCAT	628	7	+	Nicotiana tabacum	cis-acting regulatory element involved in auxin responsiveness
AtSRS6	AT3G54430	TC-rich repeats	ATTCTCTAAC	351	9	-	Nicotiana tabacum	cis-acting element involved in defense and stress responsiveness
AtSRS6	AT3G54430	WRE3	CCACCT	306	6	-	Pisum sativum
AtSRS6	AT3G54430	WRE3	CCACCT	334	6	-	Pisum sativum
AtSRS6	AT3G54430	WRE3	CCACCT	751	6	-	Pisum sativum
AtSRS6	AT3G54430	WRE3	CCACCT	1184	6	+	Pisum sativum
AtSRS6	AT3G54430	ARE	AAACCA	529	6	-	Zea mays	cis-acting regulatory element essential for the anaerobic induction
AtSRS6	AT3G54430	AT~TATA-box	TATATA	67	6	+	Arabidopsis thaliana
AtSRS6	AT3G54430	TGA-element	AACGAC	977	6	+	Brassica oleracea	auxin-responsive element
AtSRS6	AT3G54430	MRE	AACCTAA	1324	7	+	Petroselinum crispum	MYB binding site involved in light responsiveness
AtSRS6	AT3G54430	CAAT-box	CCAAT	9	5	-	Arabidopsis thaliana	common cis-acting element in promoter and enhancer regions
AtSRS6	AT3G54430	CAAT-box	CAAT	83	4	+	Nicotiana glutinosa
AtSRS6	AT3G54430	CAAT-box	CAAT	131	4	-	Nicotiana glutinosa
AtSRS6	AT3G54430	CAAT-box	CAAT	297	4	+	Nicotiana glutinosa
AtSRS6	AT3G54430	CAAT-box	CAAT	483	4	+	Nicotiana glutinosa
AtSRS6	AT3G54430	CAAT-box	CCAAT	524	5	+	Arabidopsis thaliana	common cis-acting element in promoter and enhancer regions
AtSRS6	AT3G54430	CAAT-box	CAAT	525	4	+	Nicotiana glutinosa
AtSRS6	AT3G54430	CAAT-box	CCAAT	527	5	-	Arabidopsis thaliana	common cis-acting element in promoter and enhancer regions
AtSRS6	AT3G54430	CAAT-box	CAAT	589	4	-	Nicotiana glutinosa
AtSRS6	AT3G54430	CAAT-box	CAAAT	633	5	-	Pisum sativum	common cis-acting element in promoter and enhancer regions
AtSRS6	AT3G54430	CAAT-box	CAAT	687	4	+	Nicotiana glutinosa
AtSRS6	AT3G54430	CAAT-box	CAAT	715	4	-	Nicotiana glutinosa
AtSRS6	AT3G54430	CAAT-box	CAAAT	823	5	+	Pisum sativum	common cis-acting element in promoter and enhancer regions
AtSRS6	AT3G54430	CAAT-box	CAAT	917	4	-	Nicotiana glutinosa
AtSRS6	AT3G54430	CAAT-box	CAAT	930	4	+	Nicotiana glutinosa
AtSRS6	AT3G54430	CAAT-box	CAAAT	958	5	-	Pisum sativum	common cis-acting element in promoter and enhancer regions
AtSRS6	AT3G54430	CAAT-box	CAAAT	1033	5	-	Pisum sativum	common cis-acting element in promoter and enhancer regions
AtSRS6	AT3G54430	CAAT-box	CAAT	1048	4	-	Nicotiana glutinosa
AtSRS6	AT3G54430	CAAT-box	CCAAT	1171	5	+	Arabidopsis thaliana	common cis-acting element in promoter and enhancer regions
AtSRS6	AT3G54430	CAAT-box	CAAT	1172	4	+	Nicotiana glutinosa
AtSRS6	AT3G54430	CAAT-box	CAAT	1285	4	+	Nicotiana glutinosa
AtSRS6	AT3G54430	CAAT-box	CAAAT	1308	5	+	Pisum sativum	common cis-acting element in promoter and enhancer regions
AtSRS6	AT3G54430	CAAT-box	CAAT	1398	4	+	Nicotiana glutinosa
AtSRS6	AT3G54430	CAAT-box	CAAAT	1408	5	+	Pisum sativum	common cis-acting element in promoter and enhancer regions
AtSRS6	AT3G54430	Gap-box	CAAATGAA(A/G)A	1308	9.5	+	Arabidopsis thaliana	part of a light responsive element
AtSRS6	AT3G54430	TATA-box	TATA	17	4	+	Arabidopsis thaliana	core promoter element around -30 of transcription start
AtSRS6	AT3G54430	TATA-box	TATATA	67	6	+	Arabidopsis thaliana	core promoter element around -30 of transcription start
AtSRS6	AT3G54430	TATA-box	ATATAA	68	6	+	Brassica oleracea	core promoter element around -30 of transcription start
AtSRS6	AT3G54430	TATA-box	TATA	69	4	+	Arabidopsis thaliana	core promoter element around -30 of transcription start
AtSRS6	AT3G54430	TATA-box	TATA	264	4	+	Arabidopsis thaliana	core promoter element around -30 of transcription start
AtSRS6	AT3G54430	TATA-box	TATA	576	4	+	Arabidopsis thaliana	core promoter element around -30 of transcription start
AtSRS6	AT3G54430	TATA-box	ATATAT	676	6	+	Brassica napus	core promoter element around -30 of transcription start
AtSRS6	AT3G54430	TATA-box	TATA	677	4	+	Arabidopsis thaliana	core promoter element around -30 of transcription start
AtSRS6	AT3G54430	TATA-box	TATAA	711	5	-	Arabidopsis thaliana	core promoter element around -30 of transcription start
AtSRS6	AT3G54430	TATA-box	TATA	712	4	+	Arabidopsis thaliana	core promoter element around -30 of transcription start
AtSRS6	AT3G54430	TATA-box	ATATAT	787	6	-	Brassica napus	core promoter element around -30 of transcription start
AtSRS6	AT3G54430	TATA-box	TATA	788	4	-	Arabidopsis thaliana	core promoter element around -30 of transcription start
AtSRS6	AT3G54430	TATA-box	ATTATA	839	6	+	Brassica napus	core promoter element around -30 of transcription start
AtSRS6	AT3G54430	TATA-box	TATAA	840	5	-	Arabidopsis thaliana	core promoter element around -30 of transcription start
AtSRS6	AT3G54430	TATA-box	TATA	841	4	-	Arabidopsis thaliana	core promoter element around -30 of transcription start
AtSRS6	AT3G54430	TATA-box	ATATAT	954	6	-	Brassica napus	core promoter element around -30 of transcription start
AtSRS6	AT3G54430	TATA-box	TATA	955	4	-	Arabidopsis thaliana	core promoter element around -30 of transcription start
AtSRS6	AT3G54430	TATA-box	ATATAA	1242	6	+	Brassica oleracea	core promoter element around -30 of transcription start
AtSRS6	AT3G54430	TATA-box	TATA	1243	4	-	Arabidopsis thaliana	core promoter element around -30 of transcription start
AtSRS6	AT3G54430	TATA-box	TATA	1257	4	-	Arabidopsis thaliana	core promoter element around -30 of transcription start
AtSRS6	AT3G54430	TATA-box	TATA	1366	4	-	Arabidopsis thaliana	core promoter element around -30 of transcription start
AtSRS6	AT3G54430	Unnamed__1	CGTGG	565	5	-	Zea mays
AtSRS6	AT3G54430	MYB	CAACCA	147	6	-	Arabidopsis thaliana
AtSRS6	AT3G54430	AE-box	AGAAACTT	1123	8	-	Arabidopsis thaliana	part of a module for light response
AtSRS6	AT3G54430	CARE	CAACTCCC	1213	8	+	Oryza sativa
AtSRS6	AT3G54430	3-AF3 binding site	CACTATCTAAC	351	10	-	Pisum sativum	part of a conserved DNA module array (CMA3)
AtSRS6	AT3G54430	W box	TTGACC	946	6	+	Arabidopsis thaliana
AtSRS6	AT3G54430	MYC	CAATTG	525	6	+	Arabidopsis thaliana
AtSRS6	AT3G54430	MYC	CATTTG	632	6	+	Arabidopsis thaliana
AtSRS6	AT3G54430	MYC	CATGTG	667	6	+	Arabidopsis thaliana
AtSRS6	AT3G54430	MYC	CATTTG	823	6	-	Arabidopsis thaliana
AtSRS6	AT3G54430	MYC	CATTTG	1032	6	+	Arabidopsis thaliana
AtSRS6	AT3G54430	MYC	CATGTG	1075	6	-	Arabidopsis thaliana
AtSRS6	AT3G54430	MYC	CATGTG	1109	6	+	Arabidopsis thaliana
AtSRS6	AT3G54430	MYC	CATTTG	1308	6	-	Arabidopsis thaliana
AtSRS6	AT3G54430	circadian	CAAAGATATC	953	9	-	Lycopersicon esculentum	cis-acting regulatory element involved in circadian control
AtSRS6	AT3G54430	G-Box	CACGTG	566	6	+	Pisum sativum	cis-acting regulatory element involved in light responsiveness
AtSRS7	AT1G19790	MYB	CAACCA	264	6	270	-	Arabidopsis thaliana
AtSRS7	AT1G19790	MYB	CAACAG	504	6	510	-	Arabidopsis thaliana
AtSRS7	AT1G19790	MYB	CAACAG	540	6	546	+	Arabidopsis thaliana
AtSRS7	AT1G19790	MYB	TAACCA	903	6	909	+	Arabidopsis thaliana
AtSRS7	AT1G19790	chs-CMA1a	TTACTTAA	141	8	149	+	Daucus carota	part of a light responsive element
AtSRS7	AT1G19790	chs-CMA1a	TTACTTAA	1373	8	1381	+	Daucus carota	part of a light responsive element
AtSRS7	AT1G19790	TATA-box	TATAAA	115	6	121	-	Helianthus annuus	core promoter element around -30 of transcription start
AtSRS7	AT1G19790	TATA-box	TATAA	116	5	121	-	Arabidopsis thaliana	core promoter element around -30 of transcription start
AtSRS7	AT1G19790	TATA-box	TATA	117	4	121	+	Arabidopsis thaliana	core promoter element around -30 of transcription start
AtSRS7	AT1G19790	TATA-box	TATA	150	4	154	+	Arabidopsis thaliana	core promoter element around -30 of transcription start
AtSRS7	AT1G19790	TATA-box	TATAAAT	160	7	167	-	Brassica juncea	core promoter element around -30 of transcription start
AtSRS7	AT1G19790	TATA-box	TATAAA	161	6	167	-	Helianthus annuus	core promoter element around -30 of transcription start
AtSRS7	AT1G19790	TATA-box	TATAA	162	5	167	-	Arabidopsis thaliana	core promoter element around -30 of transcription start
AtSRS7	AT1G19790	TATA-box	TATA	163	4	167	+	Arabidopsis thaliana	core promoter element around -30 of transcription start
AtSRS7	AT1G19790	TATA-box	ATATAT	213	6	219	+	Brassica napus	core promoter element around -30 of transcription start
AtSRS7	AT1G19790	TATA-box	TATA	214	4	218	+	Arabidopsis thaliana	core promoter element around -30 of transcription start
AtSRS7	AT1G19790	TATA-box	taTATAAAtc	219	9	228	-	Arabidopsis thaliana	core promoter element around -30 of transcription start
AtSRS7	AT1G19790	TATA-box	TATAAAA	222	7	229	-	Pisum sativum	core promoter element around -30 of transcription start
AtSRS7	AT1G19790	TATA-box	TATAAA	223	6	229	-	Helianthus annuus	core promoter element around -30 of transcription start
AtSRS7	AT1G19790	TATA-box	TATAA	224	5	229	-	Arabidopsis thaliana	core promoter element around -30 of transcription start
AtSRS7	AT1G19790	TATA-box	TATA	225	4	229	+	Arabidopsis thaliana	core promoter element around -30 of transcription start
AtSRS7	AT1G19790	TATA-box	ATTATA	229	6	235	+	Brassica napus	core promoter element around -30 of transcription start
AtSRS7	AT1G19790	TATA-box	TATAA	230	5	235	-	Arabidopsis thaliana	core promoter element around -30 of transcription start
AtSRS7	AT1G19790	TATA-box	TATA	231	4	235	+	Arabidopsis thaliana	core promoter element around -30 of transcription start
AtSRS7	AT1G19790	TATA-box	TATATA	335	6	341	+	Arabidopsis thaliana	core promoter element around -30 of transcription start
AtSRS7	AT1G19790	TATA-box	TATA	337	4	341	+	Arabidopsis thaliana	core promoter element around -30 of transcription start
AtSRS7	AT1G19790	TATA-box	taTATAAAtc	378	9	387	-	Arabidopsis thaliana	core promoter element around -30 of transcription start
AtSRS7	AT1G19790	TATA-box	TATAAAT	379	7	386	-	Brassica juncea	core promoter element around -30 of transcription start
AtSRS7	AT1G19790	TATA-box	TATAAA	380	6	386	-	Helianthus annuus	core promoter element around -30 of transcription start
AtSRS7	AT1G19790	TATA-box	TATATAA	381	7	388	-	Arabidopsis thaliana	core promoter element around -30 of transcription start
AtSRS7	AT1G19790	TATA-box	TATATA	382	6	388	+	Arabidopsis thaliana	core promoter element around -30 of transcription start
AtSRS7	AT1G19790	TATA-box	ATATAA	383	6	389	+	Brassica oleracea	core promoter element around -30 of transcription start
AtSRS7	AT1G19790	TATA-box	TATA	384	4	388	+	Arabidopsis thaliana	core promoter element around -30 of transcription start
AtSRS7	AT1G19790	TATA-box	TATA	448	4	452	+	Arabidopsis thaliana	core promoter element around -30 of transcription start
AtSRS7	AT1G19790	TATA-box	TATAA	455	5	460	-	Arabidopsis thaliana	core promoter element around -30 of transcription start
AtSRS7	AT1G19790	TATA-box	TATA	456	4	460	+	Arabidopsis thaliana	core promoter element around -30 of transcription start
AtSRS7	AT1G19790	TATA-box	TATA	496	4	500	+	Arabidopsis thaliana	core promoter element around -30 of transcription start
AtSRS7	AT1G19790	TATA-box	ATATAT	550	6	556	+	Brassica napus	core promoter element around -30 of transcription start
AtSRS7	AT1G19790	TATA-box	TATATA	551	6	557	+	Arabidopsis thaliana	core promoter element around -30 of transcription start
AtSRS7	AT1G19790	TATA-box	ATATAA	552	6	558	+	Brassica oleracea	core promoter element around -30 of transcription start
AtSRS7	AT1G19790	TATA-box	TATA	553	4	557	+	Arabidopsis thaliana	core promoter element around -30 of transcription start
AtSRS7	AT1G19790	TATA-box	TATA	975	4	979	-	Arabidopsis thaliana	core promoter element around -30 of transcription start
AtSRS7	AT1G19790	TATA-box	taTATAAAtc	1161	9	1170	-	Arabidopsis thaliana	core promoter element around -30 of transcription start
AtSRS7	AT1G19790	TATA-box	ATATAT	1166	6	1172	-	Brassica napus	core promoter element around -30 of transcription start
AtSRS7	AT1G19790	TATA-box	TATA	1167	4	1171	-	Arabidopsis thaliana	core promoter element around -30 of transcription start
AtSRS7	AT1G19790	TATA-box	ATATAT	1246	6	1252	-	Brassica napus	core promoter element around -30 of transcription start
AtSRS7	AT1G19790	TATA-box	TATATA	1247	6	1253	-	Arabidopsis thaliana	core promoter element around -30 of transcription start
AtSRS7	AT1G19790	TATA-box	ATATAT	1248	6	1254	-	Brassica napus	core promoter element around -30 of transcription start
AtSRS7	AT1G19790	TATA-box	TATATA	1249	6	1255	-	Arabidopsis thaliana	core promoter element around -30 of transcription start
AtSRS7	AT1G19790	TATA-box	ATATAT	1250	6	1256	-	Brassica napus	core promoter element around -30 of transcription start
AtSRS7	AT1G19790	TATA-box	TATATA	1251	6	1257	-	Arabidopsis thaliana	core promoter element around -30 of transcription start
AtSRS7	AT1G19790	TATA-box	ATATAT	1252	6	1258	-	Brassica napus	core promoter element around -30 of transcription start
AtSRS7	AT1G19790	TATA-box	TATATA	1253	6	1259	-	Arabidopsis thaliana	core promoter element around -30 of transcription start
AtSRS7	AT1G19790	TATA-box	ATATAT	1254	6	1260	-	Brassica napus	core promoter element around -30 of transcription start
AtSRS7	AT1G19790	TATA-box	TATATA	1255	6	1261	-	Arabidopsis thaliana	core promoter element around -30 of transcription start
AtSRS7	AT1G19790	TATA-box	ATATAT	1256	6	1262	-	Brassica napus	core promoter element around -30 of transcription start
AtSRS7	AT1G19790	TATA-box	TATATA	1257	6	1263	-	Arabidopsis thaliana	core promoter element around -30 of transcription start
AtSRS7	AT1G19790	TATA-box	ATATAT	1258	6	1264	-	Brassica napus	core promoter element around -30 of transcription start
AtSRS7	AT1G19790	TATA-box	TATATA	1259	6	1265	-	Arabidopsis thaliana	core promoter element around -30 of transcription start
AtSRS7	AT1G19790	TATA-box	ATATAT	1260	6	1266	-	Brassica napus	core promoter element around -30 of transcription start
AtSRS7	AT1G19790	TATA-box	TATATA	1261	6	1267	-	Arabidopsis thaliana	core promoter element around -30 of transcription start
AtSRS7	AT1G19790	TATA-box	TATA	1263	4	1267	-	Arabidopsis thaliana	core promoter element around -30 of transcription start
AtSRS7	AT1G19790	TATA-box	ATTATA	1273	6	1279	+	Brassica napus	core promoter element around -30 of transcription start
AtSRS7	AT1G19790	TATA-box	TATAA	1274	5	1279	-	Arabidopsis thaliana	core promoter element around -30 of transcription start
AtSRS7	AT1G19790	TATA-box	TATA	1275	4	1279	-	Arabidopsis thaliana	core promoter element around -30 of transcription start
AtSRS7	AT1G19790	TATA-box	ATATAT	1430	6	1436	-	Brassica napus	core promoter element around -30 of transcription start
AtSRS7	AT1G19790	TATA-box	TATATA	1431	6	1437	-	Arabidopsis thaliana	core promoter element around -30 of transcription start
AtSRS7	AT1G19790	TATA-box	ATATAT	1432	6	1438	-	Brassica napus	core promoter element around -30 of transcription start
AtSRS7	AT1G19790	TATA-box	TATA	1433	4	1437	-	Arabidopsis thaliana	core promoter element around -30 of transcription start
AtSRS7	AT1G19790	TATA-box	TATAAAA	1456	7	1463	-	Pisum sativum	core promoter element around -30 of transcription start
AtSRS7	AT1G19790	TATA-box	TATAAA	1457	6	1463	-	Helianthus annuus	core promoter element around -30 of transcription start
AtSRS7	AT1G19790	TATA-box	TATAA	1458	5	1463	-	Arabidopsis thaliana	core promoter element around -30 of transcription start
AtSRS7	AT1G19790	TATA-box	TATA	1459	4	1463	-	Arabidopsis thaliana	core promoter element around -30 of transcription start
AtSRS7	AT1G19790	Sp1	GGGCGG	1070	6	1076	+	Oryza sativa	light responsive element
AtSRS7	AT1G19790	ABRE	ACGTG	1157	5	1162	+	Arabidopsis thaliana	cis-acting element involved in the abscisic acid responsiveness
AtSRS7	AT1G19790	CAAT-box	CAAAT	50	5	55	-	Pisum sativum	common cis-acting element in promoter and enhancer regions
AtSRS7	AT1G19790	CAAT-box	CCAAT	77	5	82	+	Arabidopsis thaliana	common cis-acting element in promoter and enhancer regions
AtSRS7	AT1G19790	CAAT-box	CAAT	78	4	82	+	Nicotiana glutinosa
AtSRS7	AT1G19790	CAAT-box	CAAT	177	4	181	+	Nicotiana glutinosa
AtSRS7	AT1G19790	CAAT-box	CAAAT	210	5	215	+	Pisum sativum	common cis-acting element in promoter and enhancer regions
AtSRS7	AT1G19790	CAAT-box	CAAT	372	4	376	-	Nicotiana glutinosa
AtSRS7	AT1G19790	CAAT-box	CAAT	431	4	435	+	Nicotiana glutinosa
AtSRS7	AT1G19790	CAAT-box	CAAT	493	4	497	+	Nicotiana glutinosa
AtSRS7	AT1G19790	CAAT-box	CAAT	548	4	552	+	Nicotiana glutinosa
AtSRS7	AT1G19790	CAAT-box	CAAT	557	4	561	-	Nicotiana glutinosa
AtSRS7	AT1G19790	CAAT-box	CCAAT	569	5	574	+	Arabidopsis thaliana	common cis-acting element in promoter and enhancer regions
AtSRS7	AT1G19790	CAAT-box	CAAT	570	4	574	+	Nicotiana glutinosa
AtSRS7	AT1G19790	CAAT-box	CAAAT	580	5	585	-	Pisum sativum	common cis-acting element in promoter and enhancer regions
AtSRS7	AT1G19790	CAAT-box	CAAAT	653	5	658	+	Pisum sativum	common cis-acting element in promoter and enhancer regions
AtSRS7	AT1G19790	CAAT-box	CAAAT	680	5	685	+	Pisum sativum	common cis-acting element in promoter and enhancer regions
AtSRS7	AT1G19790	CAAT-box	CAAAT	718	5	723	+	Pisum sativum	common cis-acting element in promoter and enhancer regions
AtSRS7	AT1G19790	CAAT-box	CAAT	727	4	731	+	Nicotiana glutinosa
AtSRS7	AT1G19790	CAAT-box	CAAT	729	4	733	-	Nicotiana glutinosa
AtSRS7	AT1G19790	CAAT-box	CAAAT	837	5	842	+	Pisum sativum	common cis-acting element in promoter and enhancer regions
AtSRS7	AT1G19790	CAAT-box	CAAAT	1088	5	1093	+	Pisum sativum	common cis-acting element in promoter and enhancer regions
AtSRS7	AT1G19790	CAAT-box	CAAT	1095	4	1099	+	Nicotiana glutinosa
AtSRS7	AT1G19790	CAAT-box	CAAT	1162	4	1166	-	Nicotiana glutinosa
AtSRS7	AT1G19790	CAAT-box	CAAAT	1174	5	1179	-	Pisum sativum	common cis-acting element in promoter and enhancer regions
AtSRS7	AT1G19790	CAAT-box	CAAAT	1183	5	1188	-	Pisum sativum	common cis-acting element in promoter and enhancer regions
AtSRS7	AT1G19790	CAAT-box	CAAAT	1353	5	1358	+	Pisum sativum	common cis-acting element in promoter and enhancer regions
AtSRS7	AT1G19790	CAAT-box	CAAT	1428	4	1432	+	Nicotiana glutinosa
AtSRS7	AT1G19790	CAAT-box	CAAT	1475	4	1479	-	Nicotiana glutinosa
AtSRS7	AT1G19790	JERE	AGACCGCC	1071	8	1079	-	Arabidopsis thaliana
AtSRS7	AT1G19790	TATA	TATAAAAT	1455	8	1463	-	Arabidopsis thaliana
AtSRS7	AT1G19790		motif_sequence	375	4	379	-	organism	short_function
AtSRS7	AT1G19790		motif_sequence	468	4	472	+	organism	short_function
AtSRS7	AT1G19790	GATA-motif	GATAGGA	284	7	291	-	Arabidopsis thaliana	part of a light responsive element
AtSRS7	AT1G19790	Myb	TAACTG	619	6	625	+	Arabidopsis thaliana
AtSRS7	AT1G19790	LAMP-element	CCTTATCCA	508	9	517	-	Spinacia oleracea	part of a light responsive element
AtSRS7	AT1G19790	GT1-motif	GGTTAA	96	6	102	-	Arabidopsis thaliana	light responsive element
AtSRS7	AT1G19790	GT1-motif	GGTTAA	398	6	404	-	Arabidopsis thaliana	light responsive element
AtSRS7	AT1G19790	as-1	TGACG	1155	5	1160	+	Arabidopsis thaliana
AtSRS7	AT1G19790	TGACG-motif	TGACG	1155	5	1160	+	Hordeum vulgare	cis-acting regulatory element involved in the MeJA-responsiveness
AtSRS7	AT1G19790	I-box	atGATAAGGTC	125	10	135	+	Helianthus annuus	part of a light responsive element
AtSRS7	AT1G19790	I-box	gGATAAGGTG	509	9	518	+	Zea mays	part of a light responsive element
AtSRS7	AT1G19790	AT~TATA-box	TATATA	335	6	341	+	Arabidopsis thaliana
AtSRS7	AT1G19790	AT~TATA-box	TATATAAA	380	8	388	-	Arabidopsis thaliana
AtSRS7	AT1G19790	AT~TATA-box	TATATA	382	6	388	+	Arabidopsis thaliana
AtSRS7	AT1G19790	AT~TATA-box	TATATA	551	6	557	+	Arabidopsis thaliana
AtSRS7	AT1G19790	AT~TATA-box	TATATA	1247	6	1253	-	Arabidopsis thaliana
AtSRS7	AT1G19790	AT~TATA-box	TATATA	1249	6	1255	-	Arabidopsis thaliana
AtSRS7	AT1G19790	AT~TATA-box	TATATA	1251	6	1257	-	Arabidopsis thaliana
AtSRS7	AT1G19790	AT~TATA-box	TATATA	1253	6	1259	-	Arabidopsis thaliana
AtSRS7	AT1G19790	AT~TATA-box	TATATA	1255	6	1261	-	Arabidopsis thaliana
AtSRS7	AT1G19790	AT~TATA-box	TATATA	1257	6	1263	-	Arabidopsis thaliana
AtSRS7	AT1G19790	AT~TATA-box	TATATA	1259	6	1265	-	Arabidopsis thaliana
AtSRS7	AT1G19790	AT~TATA-box	TATATA	1261	6	1267	-	Arabidopsis thaliana
AtSRS7	AT1G19790	AT~TATA-box	TATATA	1431	6	1437	-	Arabidopsis thaliana
AtSRS7	AT1G19790	TCT-motif	TCTTAC	662	6	668	-	Arabidopsis thaliana	part of a light responsive element
AtSRS7	AT1G19790	CGTCA-motif	CGTCA	1155	5	1160	-	Hordeum vulgare	cis-acting regulatory element involved in the MeJA-responsiveness
AtSRS7	AT1G19790	MYB-like sequence	TAACCA	903	6	909	+	Arabidopsis thaliana
AtSRS7	AT1G19790	LTR	CCGAAA	918	6	924	-	Hordeum vulgare	cis-acting element involved in low-temperature responsiveness
AtSRS7	AT1G19790	LTR	CCGAAA	1405	6	1411	+	Hordeum vulgare	cis-acting element involved in low-temperature responsiveness
AtSRS7	AT1G19790	O2-site	GATGACATGG	24	9	33	-	Zea mays	cis-acting regulatory element involved in zein metabolism regulation
AtSRS7	AT1G19790	O2-site	GTTGACGTGA	1153	9	1162	+	Zea mays	cis-acting regulatory element involved in zein metabolism regulation
AtSRS7	AT1G19790	Box 4	ATTAAT	476	6	482	+	Petroselinum crispum	part of a conserved DNA module involved in light responsiveness
AtSRS7	AT1G19790	Box 4	ATTAAT	1341	6	1347	-	Petroselinum crispum	part of a conserved DNA module involved in light responsiveness
AtSRS7	AT1G19790	Unnamed__4	CTCC	43	4	47	-	Petroselinum hortense
AtSRS7	AT1G19790	Unnamed__4	CTCC	106	4	110	+	Petroselinum hortense
AtSRS7	AT1G19790	Unnamed__4	CTCC	255	4	259	-	Petroselinum hortense
AtSRS7	AT1G19790	Unnamed__4	CTCC	922	4	926	-	Petroselinum hortense
AtSRS7	AT1G19790	Unnamed__4	CTCC	1299	4	1303	-	Petroselinum hortense
AtSRS7	AT1G19790	P-box	CCTTTTG	794	7	801	+	Oryza sativa	gibberellin-responsive element
AtSRS7	AT1G19790	DRE core	GCCGAC	732	6	738	+	Arabidopsis thaliana
AtSRS7	AT1G19790	G-box	CACGTC	1156	6	1162	-	Zea mays	cis-acting regulatory element involved in light responsiveness
AtSRS7	AT1G19790	Myb-binding site	CAACAG	504	6	510	-	Nicotiana tabacum
AtSRS7	AT1G19790	Myb-binding site	CAACAG	540	6	546	+	Nicotiana tabacum
AtSRS7	AT1G19790	AT-rich element	ATAGAAATCAA	1463	10	1473	+	Glycine max	binding site of AT-rich DNA binding protein (ATBP-1)
AtSRS7	AT1G19790	Unnamed__1	CGTGG	154	5	159	-	Zea mays
AtSRS7	AT1G19790	TC-rich repeats	GTTTTCTTAC	594	9	603	-	Nicotiana tabacum	cis-acting element involved in defense and stress responsiveness
AtSRS7	AT1G19790	AAGAA-motif	GAAAGAA	594	7	601	+	Avena sativa
AtSRS7	AT1G19790	AAGAA-motif	GAAAGAA	999	7	1006	-	Avena sativa
AtSRS7	AT1G19790	AAGAA-motif	GAAAGAA	1139	7	1146	-	Avena sativa
AtSRS7	AT1G19790	MYC	CATGTG	25	6	31	+	Arabidopsis thaliana
AtSRS7	AT1G19790	MYC	CATGTG	603	6	609	+	Arabidopsis thaliana
AtSRS7	AT1G19790	MYC	CATTTG	718	6	724	-	Arabidopsis thaliana
AtSRS7	AT1G19790	MYC	CAATTG	727	6	733	+	Arabidopsis thaliana
AtSRS7	AT1G19790	MYC	CATTTG	837	6	843	-	Arabidopsis thaliana
AtSRS8	AT5G33210	Unnamed__4	CTCC	61	4	-	Petroselinum hortense
AtSRS8	AT5G33210	Unnamed__4	CTCC	95	4	-	Petroselinum hortense
AtSRS8	AT5G33210	Unnamed__4	CTCC	149	4	-	Petroselinum hortense
AtSRS8	AT5G33210	Unnamed__4	CTCC	156	4	+	Petroselinum hortense
AtSRS8	AT5G33210	Unnamed__4	CTCC	173	4	-	Petroselinum hortense
AtSRS8	AT5G33210	Unnamed__4	CTCC	203	4	-	Petroselinum hortense
AtSRS8	AT5G33210	Unnamed__4	CTCC	274	4	+	Petroselinum hortense
AtSRS8	AT5G33210	Unnamed__4	CTCC	369	4	+	Petroselinum hortense
AtSRS8	AT5G33210	ABRE3a	TACGTG	14	6	+	Zea mays
AtSRS8	AT5G33210	CCGTCC-box	CCGTCC	169	6	-	Petroselinum hortense
AtSRS8	AT5G33210	MYC	CATTTG	586	6	-	Arabidopsis thaliana
AtSRS8	AT5G33210	MYB	CAACAG	933	6	-	Arabidopsis thaliana
AtSRS8	AT5G33210	MYB	CAACCA	1059	6	+	Arabidopsis thaliana
AtSRS8	AT5G33210	MYB	TAACCA	1456	6	-	Arabidopsis thaliana
AtSRS8	AT5G33210	ATCT-motif	AATCTAATCC	447	9	-	Pisum sativum	part of a conserved DNA module involved in light responsiveness
AtSRS8	AT5G33210	AT~TATA-box	TATATA	195	6	+	Arabidopsis thaliana
AtSRS8	AT5G33210	Unnamed__1	CGTGG	180	5	-	Zea mays
AtSRS8	AT5G33210	Myb-binding site	CAACAG	933	6	-	Nicotiana tabacum
AtSRS8	AT5G33210	MYB-like sequence	TAACCA	1456	6	-	Arabidopsis thaliana
AtSRS8	AT5G33210	G-Box	CACGTG	181	6	+	Pisum sativum	cis-acting regulatory element involved in light responsiveness
AtSRS8	AT5G33210	STRE	AGGGG	519	5	-	Arabidopsis thaliana
AtSRS8	AT5G33210	STRE	AGGGG	895	5	-	Arabidopsis thaliana
AtSRS8	AT5G33210	STRE	AGGGG	1142	5	-	Arabidopsis thaliana
AtSRS8	AT5G33210	TCA-element	CCATCTTTTT	1062	9	+	Nicotiana tabacum	cis-acting element involved in salicylic acid responsiveness
AtSRS8	AT5G33210	GT1-motif	GTGTGTGAA	246	9	-	Solanum tuberosum	light responsive element
AtSRS8	AT5G33210	GT1-motif	GGTTAA	1457	6	+	Arabidopsis thaliana	light responsive element
AtSRS8	AT5G33210	MRE	AACCTAA	467	7	-	Petroselinum crispum	MYB binding site involved in light responsiveness
AtSRS8	AT5G33210	MRE	AACCTAA	490	7	-	Petroselinum crispum	MYB binding site involved in light responsiveness
AtSRS8	AT5G33210	box S	AGCCACC	811	7	+	Arabidopsis thaliana
AtSRS8	AT5G33210	TATA-box	TATATA	195	6	+	Arabidopsis thaliana	core promoter element around -30 of transcription start
AtSRS8	AT5G33210	TATA-box	ATATAA	196	6	+	Brassica oleracea	core promoter element around -30 of transcription start
AtSRS8	AT5G33210	TATA-box	TATA	197	4	+	Arabidopsis thaliana	core promoter element around -30 of transcription start
AtSRS8	AT5G33210	TATA-box	TATAAA	240	6	-	Helianthus annuus	core promoter element around -30 of transcription start
AtSRS8	AT5G33210	TATA-box	TATAA	241	5	-	Arabidopsis thaliana	core promoter element around -30 of transcription start
AtSRS8	AT5G33210	TATA-box	TATA	242	4	+	Arabidopsis thaliana	core promoter element around -30 of transcription start
AtSRS8	AT5G33210	TATA-box	TACAAAA	309	7	+	Oryza sativa	core promoter element around -30 of transcription start
AtSRS8	AT5G33210	TATA-box	ATATAA	335	6	+	Brassica oleracea	core promoter element around -30 of transcription start
AtSRS8	AT5G33210	TATA-box	TATA	336	4	+	Arabidopsis thaliana	core promoter element around -30 of transcription start
AtSRS8	AT5G33210	TATA-box	TACAAAA	617	7	-	Oryza sativa	core promoter element around -30 of transcription start
AtSRS8	AT5G33210	TATA-box	TATAAA	1067	6	-	Helianthus annuus	core promoter element around -30 of transcription start
AtSRS8	AT5G33210	TATA-box	TATAA	1068	5	-	Arabidopsis thaliana	core promoter element around -30 of transcription start
AtSRS8	AT5G33210	TATA-box	TATA	1069	4	-	Arabidopsis thaliana	core promoter element around -30 of transcription start
AtSRS8	AT5G33210	TATA-box	TATA	1146	4	-	Arabidopsis thaliana	core promoter element around -30 of transcription start
AtSRS8	AT5G33210	TATA-box	TATAA	1203	5	-	Arabidopsis thaliana	core promoter element around -30 of transcription start
AtSRS8	AT5G33210	TATA-box	TATA	1204	4	-	Arabidopsis thaliana	core promoter element around -30 of transcription start
AtSRS8	AT5G33210	TATA-box	TATA	1377	4	-	Arabidopsis thaliana	core promoter element around -30 of transcription start
AtSRS8	AT5G33210	W box	TTGACC	627	6	+	Arabidopsis thaliana
AtSRS8	AT5G33210	W box	TTGACC	761	6	+	Arabidopsis thaliana
AtSRS8	AT5G33210	CAAT-box	CAAAT	101	5	-	Pisum sativum	common cis-acting element in promoter and enhancer regions
AtSRS8	AT5G33210	CAAT-box	CAAT	231	4	+	Nicotiana glutinosa
AtSRS8	AT5G33210	CAAT-box	CAAT	284	4	-	Nicotiana glutinosa
AtSRS8	AT5G33210	CAAT-box	CAAT	306	4	+	Nicotiana glutinosa
AtSRS8	AT5G33210	CAAT-box	CAAT	333	4	+	Nicotiana glutinosa
AtSRS8	AT5G33210	CAAT-box	CAAT	386	4	+	Nicotiana glutinosa
AtSRS8	AT5G33210	CAAT-box	CAAAT	392	5	+	Pisum sativum	common cis-acting element in promoter and enhancer regions
AtSRS8	AT5G33210	CAAT-box	CAAAT	586	5	+	Pisum sativum	common cis-acting element in promoter and enhancer regions
AtSRS8	AT5G33210	CAAT-box	CCAAT	638	5	-	Arabidopsis thaliana	common cis-acting element in promoter and enhancer regions
AtSRS8	AT5G33210	CAAT-box	CCAAT	654	5	-	Arabidopsis thaliana	common cis-acting element in promoter and enhancer regions
AtSRS8	AT5G33210	CAAT-box	CAAT	668	4	-	Nicotiana glutinosa
AtSRS8	AT5G33210	CAAT-box	CAAT	710	4	-	Nicotiana glutinosa
AtSRS8	AT5G33210	CAAT-box	CAAT	760	4	-	Nicotiana glutinosa
AtSRS8	AT5G33210	CAAT-box	CAAT	843	4	+	Nicotiana glutinosa
AtSRS8	AT5G33210	CAAT-box	CAAAT	883	5	-	Pisum sativum	common cis-acting element in promoter and enhancer regions
AtSRS8	AT5G33210	CAAT-box	CAAT	901	4	-	Nicotiana glutinosa
AtSRS8	AT5G33210	CAAT-box	CAAAT	923	5	-	Pisum sativum	common cis-acting element in promoter and enhancer regions
AtSRS8	AT5G33210	CAAT-box	CAAT	939	4	-	Nicotiana glutinosa
AtSRS8	AT5G33210	CAAT-box	CAAAT	958	5	-	Pisum sativum	common cis-acting element in promoter and enhancer regions
AtSRS8	AT5G33210	CAAT-box	CCAAT	985	5	+	Arabidopsis thaliana	common cis-acting element in promoter and enhancer regions
AtSRS8	AT5G33210	CAAT-box	CAAT	986	4	+	Nicotiana glutinosa
AtSRS8	AT5G33210	CAAT-box	CAAT	1044	4	-	Nicotiana glutinosa
AtSRS8	AT5G33210	CAAT-box	CAAT	1109	4	-	Nicotiana glutinosa
AtSRS8	AT5G33210	CAAT-box	CAAT	1117	4	+	Nicotiana glutinosa
AtSRS8	AT5G33210	CAAT-box	CAAT	1123	4	+	Nicotiana glutinosa
AtSRS8	AT5G33210	CAAT-box	CAAT	1134	4	-	Nicotiana glutinosa
AtSRS8	AT5G33210	CAAT-box	CAAT	1180	4	-	Nicotiana glutinosa
AtSRS8	AT5G33210	CAAT-box	CAAT	1238	4	+	Nicotiana glutinosa
AtSRS8	AT5G33210	CAAT-box	CAAAT	1282	5	+	Pisum sativum	common cis-acting element in promoter and enhancer regions
AtSRS8	AT5G33210	CAAT-box	CCAAT	1288	5	-	Arabidopsis thaliana	common cis-acting element in promoter and enhancer regions
AtSRS8	AT5G33210	CAAT-box	CCAAT	1308	5	+	Arabidopsis thaliana	common cis-acting element in promoter and enhancer regions
AtSRS8	AT5G33210	CAAT-box	CAAT	1309	4	+	Nicotiana glutinosa
AtSRS8	AT5G33210	CAAT-box	CAAT	1381	4	+	Nicotiana glutinosa
AtSRS8	AT5G33210	ABRE	ACGTG	15	5	+	Arabidopsis thaliana	cis-acting element involved in the abscisic acid responsiveness
AtSRS8	AT5G33210	ABRE	CACGTG	181	6	+	Arabidopsis thaliana	cis-acting element involved in the abscisic acid responsiveness
AtSRS8	AT5G33210	ABRE	ACGTG	182	5	+	Arabidopsis thaliana	cis-acting element involved in the abscisic acid responsiveness
AtSRS8	AT5G33210	TCCC-motif	TCTCCCT	59	7	-	Spinacia oleracea	part of a light responsive element
AtSRS8	AT5G33210	A-box	CCGTCC	169	6	-	Petroselinum crispum	cis-acting regulatory element
AtSRS8	AT5G33210	AAGAA-motif	gGTAAAGAAA	909	9	-	Avena sativa
AtSRS8	AT5G33210	DRE core	GCCGAC	1438	6	+	Arabidopsis thaliana
AtSRS8	AT5G33210	CCGTCC motif	CCGTCC	169	6	-	Nicotiana tabacum
AtSRS8	AT5G33210		motif_sequence	61	4	-	organism	short_function
AtSRS8	AT5G33210		motif_sequence	95	4	-	organism	short_function
AtSRS8	AT5G33210		motif_sequence	105	4	-	organism	short_function
AtSRS8	AT5G33210		motif_sequence	154	4	+	organism	short_function
AtSRS8	AT5G33210		motif_sequence	160	4	-	organism	short_function
AtSRS8	AT5G33210		motif_sequence	272	4	+	organism	short_function
AtSRS8	AT5G33210		motif_sequence	357	4	-	organism	short_function
AtSRS8	AT5G33210		motif_sequence	600	4	+	organism	short_function
AtSRS8	AT5G33210		motif_sequence	664	4	-	organism	short_function
AtSRS8	AT5G33210		motif_sequence	686	4	+	organism	short_function
AtSRS8	AT5G33210		motif_sequence	727	4	-	organism	short_function
AtSRS8	AT5G33210		motif_sequence	1354	4	+	organism	short_function
AtSRS8	AT5G33210		motif_sequence	1366	4	+	organism	short_function
AtSRS8	AT5G33210		motif_sequence	1466	4	+	organism	short_function
AtSRS8	AT5G33210	ABRE4	CACGTA	14	6	-	Zea mays
AtSRS8	AT5G33210	Box 4	ATTAAT	845	6	-	Petroselinum crispum	part of a conserved DNA module involved in light responsiveness
AtSRS8	AT5G33210	Box 4	ATTAAT	1163	6	-	Petroselinum crispum	part of a conserved DNA module involved in light responsiveness
AtSRS8	AT5G33210	ARE	AAACCA	1055	6	+	Zea mays	cis-acting regulatory element essential for the anaerobic induction
AtSRS8	AT5G33210	ARE	AAACCA	1076	6	-	Zea mays	cis-acting regulatory element essential for the anaerobic induction
AtSRS8	AT5G33210	ARE	AAACCA	1305	6	+	Zea mays	cis-acting regulatory element essential for the anaerobic induction
AtSRS8	AT5G33210	ARE	AAACCA	1317	6	-	Zea mays	cis-acting regulatory element essential for the anaerobic induction
AtSRS8	AT5G33210	WRE3	CCACCT	813	6	+	Pisum sativum
AtSRS8	AT5G33210	G-box	TACGTG	14	6	+	Arabidopsis thaliana	cis-acting regulatory element involved in light responsiveness
AtSRS8	AT5G33210	G-box	CACGTG	181	6	+	Arabidopsis thaliana	cis-acting regulatory element involved in light responsiveness
AtSRS8	AT5G33210	Unnamed__2	AACCTAACCT	487	9	-	Petroselinum hortense

## Sheet: SP2 Sequence of 259 Genes
Sequences of SRS proteins
Species	Gene ID	Gene Name	Sequence
Arabidopsis (Arabidopsis thaliana)	AT5G66350	AtSHI	MAGFFSLGHGGGGNTPDNHRTNTNNPSSSGTESWLWCRNPNSNADGGEAGPSYKGTLELWQHPNNQEIIFQQQQQQQQRLDLYTSAAGLGVGPSNRSLIETSGGALMMMRSGSGSGGPSCQDCGNQSKKDCSHMRCRTCCKSRGLDCPTHVKSTWVPAAKRRERQQQLSTGQQPQQLGGSVPKRQRERIPARSTSMAYTRIPSNNTSGLEVGNFPPEVSSSAVFRCVRVSSVDDEEEEYAYKTAVSIGGHVFKGVLYDQGPAERSSSGGGSQPLNLITAGPSASSSSPNVSCNNGVVGSTSDHYIDPASLNYPTPINTFMTGTHFFSNSRS
	AT3G51060	AtSTY1	MAGFFSLDGGGGGGGGGGNNQEDHRSNTNPPPPVSEAWLWYRNPNVNANANTNVNANAPSSSNAALGTLELWQNHNQQEIMFQHQQHQQRLDLYSSAAGLGVGPSNHNQFDISGETSTAGAGRAAAMMMIRSGGSGGGSGGVSCQDCGNQAKKDCSHMRCRTCCKSRGFECSTHVRSTWVPAAKRRERQQQLATVQPQTQLPRGESVPKRHRENLPATSSSLVCTRIPSHSGLEVGNFPAEVSSSAVFRCVRVSSVEDGEEEFAYQTAVSIGGHIFKGILYDLGPGSSGGGGYNVVAAGESSSGGGGAQQLNLITAGSVTVATASSSTPNLGGIGSSSAAAATYIDPAALYPTPINTFMAGTQFFPNPRS
	AT4G36260	AtSTY2	MAGIFSLGGNNNNNGDEEEENQQQQKTNWVWYRSNANTNNINPSSSQQVWQIPPEQMLMHHHSHPQQQSLDLYPGHQIDVSDLATSSRSITISCRDCGNQAKKDCTHMRCRTCCKSRGFDCSTHVRSTWIPVARRRERQQQLHMSTSGGGGGSGSGGAGGGGSSIPKRHRDPTLPGTSSSSRLPSHSAGLEMGEASFPGEVSSDALFRCVKMSGVDDGGDGQYAYQTTVNIGGHLFKGILYDQGPESSYMSGGSGGSDHQSSSAGGGGGGHPFNPPVVTDGGGGVSSAMFVDPNSGGYYSSNMTTSVFMPPGTQFYQNPPRS
	AT5G12330	AtLRP1	MGMVGLRDVFLVAPAYHHQNAGVISGSDHMNSNAAAAAALGVGVIPLLTAGTPQQNVEDSDINFLGNNRRWQNNNNNHETQYLHFKSTNQTTVGTSSNNSGSGSGASGTATCQDCGNQAKKECKQRRCRTCCKSRGFDCSTHVKSTWVSAARRRERQVMPTGANPTAGSSLSTSSGTKKPRIVGSQQQQQQQATSHTSTSNTPPQSFETSSSRQDGGGSREAWPGQVRAAAVFKCVRVTAVEDGDDEYAYQAVVKIGGHVFKGFLYDQGLEPKEGFPSMSDLHLGGSANNHNGVSASAPILDPPNVVYGGGGGSGGGFYS
	AT2G21400	AtSRS3	MMMIMGRKCEDCGNQAKKDCVYMRCRTCCKSKAFHCQTHIKSTWVPAYRRSHHKHQSQPLSTSIPKGVQIHTTPGHFPAELSSLADFRCVKVSSIDDGKEQYAYQTTVNIGGHVFRGILHDQGLHKVMVDHHYNKNSNNHQELLTPSTSSCPLKITSPFTDFMFGTRFSSVLRR
	AT2G18120	AtSRS4	MSNFEMAGTGSSRNNEEDNQQNTNWVWYKHTNNNLSTSHNNQIWQQPSLDLYPGQIDVCDMTTSSRSLTISCQECGNQAKKGCTHGRCRTCCKSNGLHCPTHVRSTWIPIAKRRERQQQLQTPTSNPTGGSGRVGKYRDINQHATLDSSGLEMGETRFPDEVSSDALFRCVRMSGTDDGEGQYAYQTTVGIAGHLFKGILYNQGPENKSMRSTQFYENPPRS
	AT1G75520	AtSRS5	MAGFFYLGGRDNNSNNNKQDHHQVDKDHHHQDKSNYLYLYKDEIYNNNKGFEIWPPQYFQQQEHQQQQQQQQHASAPANFYSFGMVPSGSSSNNNNNRSRSLYFNVVSDHEPGGFTVTRQGGMNCQDCGNQAKKDCPHMRCRTCCKSRGFHCQTHVKSTWVPAAKRRERLAQLASLQHHSASSRETQNAKRLREASGGDNNDDKDHSGGGGSALANTRVVNANSNSGLEVSQHLPPEVNSPAIFRCVRVSSIEEDEDDQAYAYQTAVNIGGHIFKGILYDQGPEHQDNHHLNLLASTATTTNVEETATKTVTGNNNNGLMLDPSSLYPAQLNSFIAGTPFFTPPRS
	AT3G54430	AtSRS6	MLGLRNIILLSPPPTQITRPSLPPVNFAAVEDNNTVGEKVCRDCGNRAKKECLFERCRTCCKSRGYNCVTHVKSTWIPSSATRSSSSPSERKKKLKIDKQSSPNVSLLPTTTSRQERGFREGLPGKIEAPAVFKRTRVTAISNNEQAEIGYQATVTISGHIFKGFLHYYGVDHNKAFPCLSQK
	AT1G19790	AtSRS7	MAGLFYLGGRDHNKQDHHQEKDHNEDKSNNYLYLYKDEIYNNNKGFEIFPPQYFQQQQQQNHAAAPTNLYSFGMVPSGGNINNNRSTNRSLYFNVVSDHEPVRSSTGGFTVTRQGNMNCQDCGNQAKKDCPHMRCRTCCKSRGFDCQTHVKSTWVSAAKRRERQAQLAVLPAKRIRDANSRGGGDDDDDDKEDEKNDSCGGGSALACTRVVNASSSGLETSHLPPEISSPAVFRCMRVSSIDDEDEEYAYQTAVSIGGHVFKGILYDQGPSSDHHRYSSSLNGETSHQHHLNLMDSTPSAATTNAVTAVNTNNGSIDPSSLYTAVATPFNAFVAGGTPFFASSRC
	AT5G33210	AtSRS8	MDMNMEKIFEDSVPCRVRAKRGCATHPRSIAERAAMMMIRSGGSGGSGGVSCQDFGNQAKKDCSHMRCRTCCKSRGFECSTHVRSTWVPATKRRERQQQLATVQPQTQLPRGESVPKRHRENLPATSSSLVCTRIPFHSGICHCNVKYLFMCIYICLLLYGREIYNEMQAAFL
Tomato (Solanum lycopersicum)	Solyc01g110140	SlSRS01	MRREEEEEGRVSSSLSSSRCQDCGNQAKKDCTYIRCRTCCKSRGFHCETHVKSTWVPVSTRRPRHHLLHHTTIQQQQLQNGPNPKRYRSNEVIGDDHEGGNFPGEVSSPAVFRCIRVSSIDNVVDQYAYQTSVKIAGHVFIGILYDQGPDNESPRYNNYMAGESSSSGFQLHQPLILPPTTTTTSPPPSTSTYPNLFSAFNMPVQW
	Solyc02g062400	SlSRS02	MANFFSLGGNQEQQHQEISSSQALVPTESNNWFLYRNEHHHHHHNQEIPNTYKGFELWQSGNTPQHQHQHHQQQQQFRHPIYPLQDLYSTDVGLGVGPSRSGFDISAGDHEASRSGFVMMRSGGGGISCQDCGNQAKKDCQHMRCRTCCKSRGFQCQTHVKSTWVPAAKRRERQQQLAALQQQQQGHNNNNNNHKNKRQREDPSASSLVSTRLPSNTNGLEVGKFPSKVRTSAVFQCIQMSSIEDDEDQLAYQAAVSIGGHVFKGILYDQGHESQYNNMVAAGGDTSSGGSAGGVQHHHHNSAAVATATTTSGGDATAAGPSNFLDPSLFPAPLSTFMVAGTQFFPPSRSP
	Solyc02g084680	SlSRS03	MAALQRVMAGFFSLGGGAAATTSQDQQQETTNNPESNWFLYRNDHHQELPTTYRGFELWQNTNSQPQIRNPINPLQDLYPTAAVGLGIGPSHSGFPSMARPNHDPPSGGGGGSGLVMMRSGGGGISCQDCGNQAKKDCPHMRCRTCCKSRGFQCQTHVRSTWVPAAKRRERQQQLSTLQQQQEEEEQQQQQQQQQTLQLHRDNPKRPREDPSASSLVCTRILPSSTSGLEVGNFPAKVTSNAVFHCVRMSSVDDADDQFAYQTAVNIGGHVFKGILYDQGPDNQYMGGGESSSGGGSASHQHNLIGAAGTATSAATSGGAAPEASPYLDPSLYPAPLNTFMAGTQFFPPPRS
	Solyc03g033680	SlSRS04	MSSIEENEDQIAYQAAVNINGHIFKGILYDQGDNHEYNYMNGGDYDSSSGGDPVPRQYNLNITRTATSAANDVAVGGGGVASAMAAEGSSHFLETSLYSSVNTFVAGTQFFPPSRS
	Solyc04g080970	SlSRS05	MSGFFTLGGGGGGGGNKSQPQQEQDQLATNSLLLFKDDEIYNKGFELWQQYYQLHQQRAHPPHHQAQDVDFSVGVGPSCNRRIISTGSSSSSGGNNNIVGGGTDDHHHHQNITNHYTNSSSYRSSSGFRVMRPSSSGGAGGGINCQDCGNQAKKDCSHLRCRTCCKSRGFQCNTHVKSTWVPAAKRRERLQQLTAIQQNQQQQTQLLSLRADHHSNIPKRPRENPSSSSLACTRIPNILSGLELGGHFPSEVSSQAVFRCVKVSAIDDADDQYAYHTAVNIGGHLFKGILYDQGVEGRYSGGVGGGGESSSGSGAAQQALNFITGATTSTTTAVATTSHQHQPAVTMYDPSVYPTPITAFLAGTQFFPPPRP
	Solyc08g077450	SlSRS06	MAASSPALSNSADNAPSPAPAPAVPTATAAAAFSSLPTTNASKNLRGLNKPKCIKCGNVARSRCPFQSCKSCCAKAQNPCHIHVLKGGSTLPDKIPASGSPVVDQQSTEASHAGSSHRAVSLRQLSTNFAQFNNLQTPLRSRRPLSRKDAQVINEWRFMQLKEYRESNIAAENEAFDRYMQNIGLLEEVFGVNSAEDENNEDGSTEDENEAMMNRVKLQLRSDPVRIENTRKRMQYVIDQGLRKGRKLEAGDNATDLNDLDALGKKKKAKTAEAEHVAAFADLMDKLNKARNEEDLKVCWEMKSQLFNQPKKEKQTEPEDAEVSNEQSLKTSDPPIMPWGHSQPKWFSTVTIDDEELRRINEEFDSLEDIEEL
	Solyc10g054070	SlSRS07	MMMREDEGIVISSSNNKRCEDCGNQAKKDCLYFRCRTCCKTRGYQCQTHVKSTWIPISTRRSRHHHPSSTVQQPNPKRHRPNHALLQTGGEEEKEELPSEVSLPAIFRCVRVSSVDNMVDQYAYQTSVNIAGHVFKGILYDQGNNMPNQTSSRGFHQQQLTNFTPPISTTYPTFMPGMQLFQYPKSS
	Solyc11g064800	SlSRS08	MWSASASSRQMQINYGLQPAEMGMFVVHPASFHQNHENTINFDPHGNSNDNSNLSNTNTSLGVGVGVIPLLTATPLSNMVTFDDQDLVRNNRGGNNGGFQFFSNEQQQNSTTNYNTKNSTSSNNIILGGGGSISSTTCQDCGNQAKKDCTHRRCRTCCKSRGYDCNTHVKSTWVPASRRRERQLMGASTTTTTTNRNVVAAGSSSQSTSSAKKPRLVNSQTTTTASHTSTSNNTPPRSFDTSSSHQDASFKGSLPGQVRAPAVFKCVRVTSVDEGEDEYAYQAVVKIGGHVFKGFLYDQGLDEPKDNNNFPNLSDLHLGAVATNEHLYAASTSGGGGLLGGGSNYGQYIVICDLQLSTAKVAFMPFLLGCIEPLKTLKK
Rice (Oryza sativa)	Os01g72490	OsSRS01	MADVGMVVVTPAASFHHTHHHHHHHEAAAAAAAAAAAAADPIFPLLSAGPCVLDPDKSAASGSAIQFWQPPPQLPSSAAGGNPNPSSSAFPYLKKPLPMLDTGGGSSGSGGAATCQDCGNQAKKDCGHQRCRTCCKSRGFDCSTHVKSTWVPAARRRERQQLTGSASSSPATASAAAASKKPRLLTSQTTTSHTSTSNATTPRSFDTTSSHQDASFRESLPRQVRAPAVFRCVRVTSIDDGEDEYAYQATVTINGHVFKGFLYDQGVDDGRGLAATSNDDSTAGGVPNISELHLGGASISGNAMREGGSSMVHSDLYGGGGGSGGGPHILGGSSYGNTMN
	Os05g32070	OsSRS02	MVLVAPAASYHHHRAAAAAAAAAAAAAAAEPVFPLLGTGQCALDADTAKSSGAAAAAGVPPGSASAIHFWQSQPTTAAGAGGGSADKKPLPMLDYGGIGGPGGSGAATCHDCGNQAKKDCVHHRCRTCCKSRGFDCPTHVRSTWVPAARRRERQQLAGAASSPPTSSAFPAATTASAKKPRLLGSQTTTTTSRTSTSNATTPRSFDTSSSHQVASFRDALPRHVRAPAVFRCVRVTSVDDGDDEFAYQAAVTINGHMFRGFLYDQGADDGRGGMASTSNDESSHGAGAAVPSISDLHLGSASAAVPPHLYSGGSGGPLILGGLGYGNTMN
	Os06g49830	OsSRS03	MAGFSLRGGGGGGGGGGGVGGGGGGGRGGERGGGGDHAIGADSLFLYARGAAAAAADTAGSGGGGGGIGFQLWHPQQQAAAAAAAVPHTSQFFSSGVATGVVLGFSSHDGGGGGGHMGGPGGGAGGGRAGTSCQDCGNNAKKDCSHLRCRTCCRSRGFSCATHVKSTWVPAAKRRERQQQLAALFRGAAANNSAAAAAAAAASKRPRELVRTLGRLPSANTAMVATTTSSGEGDGRFPPELSVEAVFRCVRIGAVDEADAELAYQTAVSIGGHTFKGILRDHGPADEAAGQLPPSSAEYHQLTGQGREESSPAGSSEGVGGGHGAATAATSAAVLMDPYPTIGAFAAGTQFFPHNPRT
	Os08g43410	OsSRS04	MAGFPLGGGGGRHGRDDHHRPPVNPTDSAAAFLYPSTASRGGFQLWQQQPPPAAHPFYAQNIIRFADDPAAPPSSRGGRGGGPGGSGGGGTISCQDCGNQAKKDCTHLRCRTCCKSRGFDCATHVKSTWVPAAKRRERQNLLASAAESSKRPRDSAAAATSTTPTTSSGEQQQMMVGERFPREVSSEAVFRCVRLGPVEEADAEVAYQTTVSIGGHVFKGILHDVGPEHSSGGGGGMGGRHAAAGEAGSSPSTAAAPHGGGEGGSSGVAAAAAAVSSSAVVMDPYPTPGPFGGAHFFHGHPR
	Os09g36160	OsSRS05	MAGFPLGGGSHSRDNPAPPVPPVHPADAASFLYATRGGSFQLWQQQEQQPFYASNIIRFADDAPPAPSLAGASSSSSSRGMRSSGGGGGGGGGGISCQDCGNQAKKDCTHMRCRTCCKSRGFACATHVKSTWVPAAKRRERQQQLAALAASAAATAGGAGPSRDPTKRPRARPSATTPTTSSGDQQMVTVAERFPREVSSEAVFRCVRLGPVDQAEAEVAYQTAVSIGGHVFKGILHDVGPEALAVAGGGGASEYHFRLTGDGSSPSTAAAGEAGSGGGGNIIVSSAVVMDPYPTPGPYGAFPAGTPFFHGHPRP
Wheat (Triticum aestivum)	TraesCS1A02G241400	TaSRS01	MVVLAPASSFHHQRAAAAAAAAADGADQGFALLSAGQCGLADPGAPKSGSAIQFWQSHSQPPATPPAVAPADKKQVASAVDYGGVSSGSGGSTTCSDCGNQAKKDCPHQRCRTCCKSRGFDCTTHVRSTWIPAARRREKHPLGGDLSPPAAPATAATKKPRFHSSQTTTTTTTSRTSTSNGTSSSQQDAPFRDSLPRHVRAPAVFRCVRVTSVDDGADEFAYQAAVSINGHMFRGFLYDQGADNGRTSNDEPSHAHAAAVRSISDLHLGNASAVPPDMYNTVSGALILGGMGYAGKREPMCNACGDKNSFALLK
	TraesCS1B02G253200	TaSRS02	MVVLAPASSFHHQRAAAAAAAADAADQGFALLSAGQCGLADPGAPKSGSAIQFWQSHSQPHTTPPAAAPADKKQVVSAVDYGGVSSGSGGSTTCNDCGNQAKKDCPHQRCRTCCKSRGFDCTTHVRSTWIPAARRREKHPLGGDLSPPAAPATAATKKPRFHSSQTTTTTTTSRTSTSNGTSSSQQDAPFRDSLPRHVRAPAVFRCVRVTSVDDGADEFAYQAAVSINGHMFRGFLYDQGADNGRTSNDEPSHAHAAAVRSISDLHLGNASTVPPDMYNTVSGALILGGMGYAGKREPMCNACGDKNSLALLK
	TraesCS1D02G241300	TaSRS03	MVVLAPASSFHHQRAAAAAAAADGADQGFALLSAGQCGLADPGAPKSGSAIQFWQSHSQPPTTPPAAAPADKKQVISAVDYGGVSSGSGGSTTCSDCGNQAKKDCPHQRCRTCCKSRGFDCTTHVRSTWIPAARRREKHPLGGDLSPPAAPATAATKKPRFHSSQTTTTTTPSRTSTSNGTSSSQQDAPFRDSLPRHVRAPAVFRCVRVTSVDDGADEFAYQAAVSINGHMFRGFLYDQGADNGRASNDEPSHAHAAAVRSISDLHLGNASAVPPDMYNTVSGALILGGMGYAGKREPMCNACGDKNSLALLK
	TraesCS3A02G491500	TaSRS04	MLDAGGDGSSGSGTTTCQDCGNQAKKDCTHSRCRTCCKSRGFDCSTHVKSTWVPAARRRERQHLGGSASSPANASTAAGSKKPRLLSSQQATTSHTSTSNATTPRSYDTTSSHQDASFRGYLPRQVRAPAVFRCVRVTSVDDGEDEYAYQATVTINGHVFKGFLYDQGVDDGRASNDMDSSTGGAVPNMSELHLGGGGGNAARGGGGSSSMAPSDMYGGGGAGGAGGGGGGQQHILGGGSSYGNTMN
	TraesCS3B02G552400	TaSRS05	MAAGDVGMVVVAPAASFHHTHHHHHHHDAAAAAAASDAIFPLLSAGPCVLDPEAAKAAAAASGGIQFWQSAQHHHQQQHSPSAAGGGGGGGNPNPSLGAFYLKKPGPMLDPGGDGSSGSGTTTCQDCGNQAKKDCTHSRCRTCCKSRGFDCSTHVKSTWVPAARRRERQHLGGSSSSPANATAAGSKKPRLLSSQQPTTSHTSTSNATTPRSYDTTSSHQDASFRGNLPRQVRAPAVFRCVRVTSVDDGEDEYAYQATVTINGHVFKGFLYDQGVDDGRASNDIDSSTGGAVPNMSELHLGGGGNAARGGGGGSSSMAPSDMYGGAGAGGAGGGGGGQHILGGGSSYGNTMN
	TraesCS3D02G497300	TaSRS06	MAAGDVGMVVVAPAASFHHTHHHHHHHDAAAAAAASDAIFPLLSAGSCVLDPEAAKAAAASGGIQFWQSAQHHQQQHSPSAAGGGGGNPNPSLGPFYLKKPFPMLDTGGDGSSGSGTTTCQDCGNQAKKDCTHSRCRTCCKSRGFDCSTHVKSTWVPAARRRERQHLGGSASSPATASTAAGSKKPRLLSSQQATTSYTSTSNATTPRSYDTTSSHQDASFRGNLPRQVRAPAVFRCVRVTSVDDGEDEYAYQATVTINGHVFKGFLYDQGVDDGRASNDIDSSTGGAVPNMSELHLGGGGNAARGGGGSSSMAPSDMYGGGGAGGAGGGGGGQHILGGGSSYGNTMN
	TraesCS5A02G319200	TaSRS07	MAGFPLGTGGSGRDSSASPPGVHPSDASTFLYATRGGGFQLWGQPQDQQQLTHPFYAPNLIRFATDDLPAGAAQSLAGAASSSSSRGARAAALAGTGGGTSCQDCGNQAKKDCQHQRCRTCCKSRGFACSTHVKSTWVPASKRRERQQQLTALAASAAATTGGAGPSRDLTKRPRARLAATTPTTSSGDQQMVTVAERFPREVSSEAVFRCVRLGPVDQAEAELAYQTTVSIGGHVFKGILHDVGPSNAHAQLQAAAGGSGGGGGDYQFRLTGDVSPPSTGAEAGDAGGGNNHNIVVSSAVVMDPYPTPGLYGSFPATTPFFHGHPYQRQ
	TraesCS5B02G319600	TaSRS08	MAGFPLGTGGSGRDSSASPTGVHPSDASTFLYATRGGGFQLWGQPQDQQQLTHPFYAPNLIRFATDDIPAGAAQSLAGAASSSSSRGARAAALAGTGGGTSCQDCGNQAKKDCQHQRCRTCCKSRGFACSTHVKSTWVPASKRRERQQQLTALAASAAATTGGAGPSRDLTKRPRARLAATTPTTSSGDQQMVTVAERFPREVSSEAVFRCVRLGPVDQAEAELAYQTTVSIGGHVFKGILHDVGPSNAHAQLQAAAGGSGGGGGDYQFRLTGDVSPPSTGAEAGDAGGGNNHNIVVSSAVVMDPYPTPGLYGSFPATTPFFHGHPYQRQ
	TraesCS5D02G325400	TaSRS09	MAGFPLGTGGSGRDSSASPPGVHPSDASTFLYATRGGGFQLWGQPQDQQQLTHPFYAPNLIRFATDDLPAGAAQSLAGAASSSSSRGARAAALAGTGGGTSCQDCGNQAKKDCQHQRCRTCCKSRGFACSTHVKSTWVPASKRRERQQQLTALAASAAATTGGAGPSRDLTKRPRARLAATTPTTSSGDQQMVTVAERFPREVSSEAVFRCVRLGPVDQAEAELAYQTTVSIGGHVFKGILHDVGPSNAHAQLQAAAGGSGGGGGDYQFRLTGDVSPPSTGAEAGDAGGGNNHNIVVSSAVVMDPYPTPGLYGSFPATTPFFHGHPYQRQ
	TraesCS7A02G270900	TaSRS10	MAGFPLGGGGHHSRGGRDDDGSHPPGINPSSSSSAAAFLYATTPSRGGFQLWQGQPQPQHEQQHHQFYGGASSSIIRFADDPAASGSSSRGGGRGSGAGAGAGTISCQDCGNQAKKDCPHMRCRTCCKSRGFDCATHVKSTWVPAARRRERHHQQPQGQTSAEPFKRPREAGQPSSTTPTTTSSGEHQQQMMAADRFPREVSSEAVFRCVRLGPVDEAEAEVAYQTTVSIGGHVFKGILHDVGPDTSITGGTRTGHHAVEGSSPSTAAAGGAEGGSGSTGAAAVSSSAVVMDPYPTPGPYGAYGGAPFFHGHHPR
	TraesCS7A02G406300	TaSRS11	MAGFSLRGGGGGGGGGSGGRSGDRGDHPIGADSLFLYARGAAAAAADTAGGGGGGGGGIGFQLWHPHHQQAAAVPHTSQFFSSGVATGVVLGFSPHEGGGVGGVGLAGGGGPGGGRAGTSCQDCGNNAKKDCTHQRCRTCCRSRGFNCATHVKSTWVPASKRRERQQQLAALFRGAAANNSAAAAAAAAVANKRPRELVRSLGRLPSATTAMVDATTSSGEGDGRFPPELSLEAVFRCVRIGPVDEPDAEFAYQTAVSIGGHTFKGILRDHGPAEEAAGQLPPSSAEYHQLTGAAREGSSPAGSSEAAGGHGATVATSAAVLMDPYPTPIGAFAAGTQFFPHNPRT
	TraesCS7B02G169200	TaSRS12	MAGFPLGGGGHHSRGGRDDDGSHPPGINPSSSSSAAAFLYATTPSRGGFQLWQGQPQPQHEQQQHPFYGGASSSIIRFADDPAASGSSSRCGGRGSGAGTISCQDCGNQAKKDCPHMRCRTCCKSRGFDCATHVKSTWVPAARRRERHHQQPQGQASAEPFKRPREGGQPSSATPTTTSSGEHQQQMMAADRFPREVSSEAVFRCVRLGPVDEAEAEVAYQTTVSIGGHVFKGILHDVGPDTSITGGTRAGHHAAEGSSPSTAAAGGAEGGSGSTGAAAVSSSAVVMDPYPTPGPYGAYGGAPFFHGHHPSTTQHLGELRSLVLPPKAEIMSALT
	TraesCS7B02G306300	TaSRS13	MAGFSLRGGCGGSGGGSGGRSGDRGDHPIGADSLFLYARGAAAAAADTAGGGGGGGGGIGFQLWHPHHQQAAAVPHTSQFFSSGVATGVVLGFSPHEGGGVGGVGLAGGGGPGGGRAGTSCQDCGNNAKKDCTNQRCRTCCRSRGFNCSTHVKSTWVPASKRRERQQQLAALFRGAAANNSAAATAAAAVANKRPRELVRSLGRLPSATTAMVDATTSSGEGDGRFPPELSLEAVFRCVRIGPVDEPDAEFAYQTAVSIGGHTFKGILRDHGPAEEAAGQLPPSSGEYHELTGAAREGSSPAGSSEAAGGHGATVATSAAVLMDPYPTPIGAFAAGTQFFPHNPRT
	TraesCS7D02G271400	TaSRS14	MAGFPLGGGGHHSRGGRDDDGSHPPGINPSSSSSAAAFLYATTPSRGGFQLWQGQPQPQHEQQQHPFYGGASSSIIRFADDPAASGSSSRGGGRGSGAGAGAGTISCQDCGNQAKKDCPHMRCRTCCKSRGFDCATHVKSTWVPAARRRERHHQQPQGQASAEPFKRPREGGQPSATTPTTTSSGEHQQQMMAADRFPREVSSEAVFRCVRLGPVDEAEAEVAYQTTVSIGGHVFKGILHDVGPDTSITGGTRTAHHAAEGSSPSTAAAGGAEGGSGSTGAAAVSSSAVVMDPYPTPGPYGAYGGAPFFHGHHPR
	TraesCS7D02G400000	TaSRS15	MAGFSLRGGGGGGGGGSGGRSGDRGDHPIGADSLFLYARGAAAAAADTAGGGGGGGGGIGFQLWHPHHQQAAAVPHTSQFFSSGVATGVVLGFSPHEGGGVGGVGLAGGGGPGGGRAGTSCQDCGNNAKKDCTHQRCRTCCRSRGFNCSTHVKSTWVPASKRRERQQQLAALFRGAAANNSAAAAAAAAVANKRPRELVRSLGRLPSATTAMVDATTSSGEGDGRFPPELSLEAVFRCVRIGPVDEPDAEFAYQTAVSIGGHTFKGILRDHGPAEEATGQLPPSSAEYHQLTGAAREGSSPAGSSEAAGGHGATVATSAAVLMDPYPTPIGAFAAGTQFFPHNPRT
Maize (Zea mays)	GRMZM2G017606_P01	ZmSRS01	MAGFPLGGGGHGRGDHHHPHVNPSSGSGSDSAAAAYLYTAAAAPRGGFQLWPPHPAQEHHHHFYAPNIIRFADDPAAGSSRGGRGSASGAGAGTISCQDCGNQAKKDCVHMRCRTCCKSRGFDCPTHVKSTWVPAAKRRERQQQQATGAAEPSKRHRDAATGAQPSSTTATTTSSGEQQQMAVVAERFPREVSSEALFRCVRLGPVDEPDAEVAYQTSVSIAGHVFKGILHDVGPEPSTVAAGGGFRHATEGSSPSTAAAGEGSVVGPVSSSAVVMDPYPTPGPYGAAHFFHGHPR
	GRMZM2G042407_P01	ZmSRS02	MAGFPLGGGGHGRGDHHHHHHPHVNPSSASGSDSATAAAYLYTAAAPRGGFQLWPHHPAEEHHHHFYAPNIIRFADDPFAGSSRGGRGSDAFVAAGAGTISCQDCGNQAKKDCVHMRCRTCCKTRGFDCPTHVKSTWVPAAKRRERQQQVTEPSKRHRDATVGAQPSSTTATTTSSGEQQQMAVAAERFPREVSSEALFRCVRLGPVDEPGAEVAYQTSVNIAGHVFKGILHDVGPDPSSSVAAGGGGFRHATDGSSPGTAGEGSVAGAGPVSSSAVVMDPYPTPTTPGPYGGSHFFHGHPR
	GRMZM2G077752_P01	ZmSRS03	MRQAAAMNYGMADVGMVVVAPAASFHHTHHHHHHHEAAAAAAAAAAASGDPIFPLLSGGPCVLDPDKSASASAIQFWQQQPPPPSSPAAAAGANPNPSASPFAYLKKPLPMLDAGAGSSGSGATTCQDCGNQAKKDCGHNRCRTCCKSRGFDCNTHVKSTWVPAARRRERQQLAASGSASSSPATASAAAVAASASASASKKPRLLSSQTTTSHTSTSNATTPRSFDTTSSHQDASFRDSLPRQVRAPAVFKCVRVTSIEDGEDEYAYQATVTINGHLFKGFLYDQGPDDGRHAATSNDDCTAGGVPNISELHLGAASGSGAGTGTSMSMAPPTGLYGGGGGGHHPHILGGSSSYGNTMN
	GRMZM2G080295_P01	ZmSRS04	MAGFPLGGGSHTQSRDAPASSVPPVHPSDAASFLYAARAGAGLQLWQQQQQHPFYNSNIIRFSDDPPGAAPSLTGAASPSSPSRGPRAGGGSGGGGGVSCQDCGNQAKKDCVHQRCRTCCKSRGFACSTHVKSTWVSAAKRRERQQQLAALAASAGDTAAAAGPSRDPTKRPRARLSVATPTTTSSGDQQMVTVAERFPREVSSEALFRCVRLGPVDRAEAEVAYQTTVSIGGHVFKGILHDVGPRSLPAAGGGAAAAAIEYYFRHAADGSPPSTTGAAGEACGAGGVGNVVVSSAVVMDPYPTPGPYTAFLPGAPFFPGHPRQ
	GRMZM2G097683_P01	ZmSRS05	MAGFSLRGGGGGRGGDRGGDHPIGADSLFLYARGAAAAAADTAASGGGGGGGIGFQLWHPHQQATAAAVPHTSQFFSSGAVATGVVLGFSSHDGAGGIGGAGGAGAGGGRAGTSCQDCGNNAKKDCTHMRCRTCCRSRGFSCPTHVKSTWVPAAKRRERQQQLAALFRGAANSNSAAAAAAAAASKRPRELVRSLGRLPSANSAMVTTTTSSGDGGGGRFPPELSVEAVFRCVRIGPVDEPDAELAYQTAVSIGGHTFKGILRDHGPADDAAVGQLPPSSAEYHHQLTAGQAREGSSPAGSSEAAATVATSAAVLMDPYPTPIGAFAAGTQFFPHNPRT
	GRMZM2G108798_P01	ZmSRS06	MAGFSLRSGGAGGGGGGRGGDRGGDHSIGADSLFLYARGAAAAAADTAASGGGIGFQLWHPHQVQQAAAAPHTSQFFSSGAVATGVVLGFSSHDGGAAGIAGAGGGRAGTSCQDCGNNAKKDCPHMRCRTCCRSRGFSCPTHVKSTWVPAAKRRERQQQLAALFRGAANSNSAAAAASKRPRELVRSLGRLPSANSAMVTTTTSSGDGGGGRFPPELSVEAVFRCVRIGPVDEPDAELAYQTAVNIGGHTFKGILRDHGPADDAGHLPPPSAEYHHHQLTAGQAREAPSPAGSSEAAATAATSAAVLMDPYPTPIGAFAAGTQFFPHNPRT
	GRMZM2G135783_P01	ZmSRS07	MAGFPLGGGGHSRDAPASSVPPVHPSDAASFLYAARAGAGLQLWQQHEQQQQHPFYTSNIIRFSDDPTGAPPSLTGAASSSSSRGTRGGAGSGGGGGGGVSCQDCGNQAKKDCVHQRCRTCCKSRGFTCSTHVKSTWVPAAKRRERQQQLAVLAASAAATTAGAGPSRDPTKRPRARLSVATPATSSGDQQMVTVAERFPREVSSEAVFRCVRLGPVDQAEAEVAYQTTVSIGGHVFKGILHDVGPHSLPAAGVGGGAIEYHFRHAGDGLPPSTAATGEAGGGGVGSVVVSSAVVMDPYPTPGPYAAFPAGAPFFHGHPRQ
	GRMZM2G179021_P01	ZmSRS08	MHPFDAASFFSTTPEGGSFDARQQEEELAGAASSSPTPSRGTRAGVENASIRCQDCGHRAKAYYCAHCCSDRGFVCPGHAKTPYVPASQCSKRQQRLAAVDVELMPISKRPHRPALPSVAAHTTTSSVDQPIVTPALQRFAREVSLDAVFRRVRLGGPEPDVAYYTTITIAGHVFRGVLYDVGPHSGSGSTAASDTDGSGEEVGSSLTTAGGSCLDLTLGM
	GRMZM2G450459_P01	ZmSRS09	MAGPGPALQAAAARLRSCRVAIDPDRAGADSRSIFPRPFLRSSAGLWGPAASRQAAGYGAIGATGDVGMLVVAPAGSFHHQRAAADDPVLPLITAAQRTLVGADGPSGNAKLPVSSAGAIQFWQQEPAAGGSLGKKALAMLDHGRGGSGSGGATCQDCGNQAKKGCAHSRCRTCCNSRGFECDTHVKSTWVPAARRWERLQLAGGAGAGATASPPSLAPTTTKRPRLACPTPTRTTNSRASTSNATTPRSFDTSSSHQDASFKDSLPRQVRGPAVFRCVRVTSVDDGGGGGTNGEVAYQAAVTINGHLFRGLLYDHGAEDAVMPTASDLNLRSTRAPRSSSAAWATVTHHELI
Wax gourd (Benincasa hispida)	Bhi01M001886	BhiSRS01	MAGFFPLDGGGSSGRGPNYQFPTTTTTTTTGGGEIIHPTDGLFWYKNYERLETWEEQQQQQEQGGEGFVYSGDESPARSSLVMVRSGRGGSGGQVMSCQDCGNQAKKDCVHMRCRTCCKSRGFECETHVKSTWVPASKRRERHLRCDGSNPKRPKDAASSGLEMGIFPAEVSSTAVFRCVRMTTLDETSEQCAYQTAVNIGGHIFKGILYDHGPEQPPTSASPNGGALLITTAESATLLDPPPPYPTPLTTYIPAGTQFFLPPTS
	Bhi02M001250	BhiSRS02	MWPSSRPLAIGYGHTAAPPTDMVGLMASGFGVGVSVLPLLTGLAPSSVGIEEANLMISRGGGDGGGGGGGVQFNGNNLDGFGILGGGSSLNSGAGTCHDCGNQAKKDCSHRRCRSCCKSRGFDCSTHVKSTWVPAARRRERQMLSAASDVAAGGTSSGSTSGGKKPRLIASQTTTNSHTSTSNTPTPSFDASSAADMSCKKAKKLPEQIRAPAVFKCVRVTAVEGGSSGGGNEYAYQAIVKIGGHIFKGYLYDHGVEARDGFPTLSNLHLGDGGSTSSPVIDPADVYGSSAARGGALAGGSGYGNPIN
	Bhi03M000673	BhiSRS03	MSGFFTLGGGGGGREDHQDQHQQHNRPNQIIPPPDTSLFWYKGNVELWQQQPQQQQEQPLFQTQSRTTTTTPPYSATIPLRNSDESSSRSGNFMMISSGSGGGGISCQDCGNQAKKDCSHMRCRTCCKSRGFHCETHVKSTWVPAAKRRERQDKLAALQSHHHHHHQLHLHGDNNPKRHRDYNPTSTSSLACTLIPTNNNTSGLEIGNFPAELNSPAVFRCVRVSSTDDTDEQYAYQTAVNIGGHVFKGILYDQGPENNYIPPAETSSGGGGSSSGVQPLNFIAGAADATTASGGSTAALPLMDPSSLYSTPLNSFMAGTQFFLPPRS
	Bhi05M000625	BhiSRS04	MRKLLYLGGKQEVDEEEMIRGREQQLFLYSTNNNEEIYSKGLEIWPQQNVENYISFGVMGPTRKNFVINASDHEFVSRLGFPVMRGGGGGMNCQDCGNQAKKDCSHLRCRTCCKSRGFHCQTHVKSTWVPAAKRRERQQQRHQIVQHHHRQQFQADQSDQTTPKRHGENQPPLVTPIVTSGLEVAHFPTEFNSVAVFRCVKVSAIDNVEEQLAYQTSINVGGHMFKGILYDHGLETSQNTSTGGESSYCHDGEDDGQALDLLIGASNDGGRVSQSSSAPLSMESSLYPISINTFNTGTQFFPSTRA
	Bhi07M001030	BhiSRS05	MLGLRDVLFIAPTPSSLHQQTQIISSDHHPSLPLPSSAALGVSVGIFPLLTATPCLPPPQPLPNQTADDVTDRSRSLENLKRTQDFGFGKGDSLMGGAGNNVSDEQVKGDAGDGSMAVCRDCGNRAKKECEYRRCRTCCKGRGNHCSTHVKSTWVPAARRRERQMLVVMDGVATASGDGGSSGSSSAGAKRPRVLIPSQSTAAAAAASTSNATTPRSFETTSSHQDASFKKSLPGHVRAPAVFRCHRVTAINSGEGELAYQATVNIGGHVFKGFLYDQGADDKNAFPSISHLHLDSGNHHRD
	Bhi09M001884	BhiSRS06	MTELFYLDRKPVEDPENQRGRSEQQLFLYNRSTNNQEIYSKGLQIRPHYAHNHHPPQQNVENYISFGVEPSPTTTNFMINASDHDFVSRSGFTMMRHGGGSGGGGGGINCQDCGNQAKKDCSHLRCRTCCKSRGFHCQTHVKSTWVPAAKRREREQQRHQQLRADQLSAQTIHKSHRENQPSLTPTITSGLELGNFQSEFNSSAVFRCVKVSAIDNVEEELAYQTTVNIGGHMFKGILYDQGPESSQNLSNGGDREDSGEGLDLVIGASSNGGGRVNQSAPFVESSLYPIQINTFNNGTQFFTSSRT
	Bhi10M000200	BhiSRS07	MWSAAAAQRSLNYGLGSEMGMVGLRDVYVVAPASSFNPNPHQHDANLMSDPHSLAVSNPATALGVGVGVGVIPLLTAGPCLGVEEENLLSNRSSSRGGGIQLWQQNQQSTQHYLKKTPSASLDHHLHNASGANNDLIGGGIGVSGGLASSSSATTTCQDCGNQAKKDCSHRRCRTCCRSRGFDCATHVKSTWVPAARRRERQLMTVTATFAAGSSGSTSGAKKPRLIASQTTSHTSTSNTTPPRSLDTSSSHQDAGFKETLPGQVRAPAVFKCVRVTAVEDGDDEYAYQAVVKIGGHVFKGLLYDQGVEAGDAFPNVSELHLGDGGSGGRNNRNGSSSSPLVDPSDVYNAAASGGGGVPGFLGGPNYDLHIQIVLSVFEHRDATSSL
Canola (Brassica napus)	BnaA01g01350D	BnSRS01	MSGMFSLGGNNNNNNNGYEEEENQQQQNTNWAWYRSNTNTNNITPGSSQWQIPPEQQLLMHHHQSQPQQQSLDLYPGHQIDVSDVATSSRSITISCRDCGNQAKKDCTHMRCRTCCKSRGFDCSTHVRSTWIPVARRRERQQQVQMSTSGGSGNGGGGSSIAKRHRDTTRPGTSSFRSPSDSAGLEMGEASFPPEVSSDALFQCVKMSGVDDGEDDGQYAYQTTVNIGGHLFKGILYDQGPESSYVSGGSGGSDHQSSSAGGGNPINTPAMADGGGGSSTMFVDPNSSGYYSSNMATMFVPPGTQFYQNPPRS
	BnaA01g19680D	BnSRS02	MAGFFSLGGGGGGGGGGNSQEEHRNPPPPVSEAWLWYRNPNTNANAPSSSNAALGTLELWQNHNQQEIMFQHQQHQQRLDLYSSAAGLGVGPSNHSQFDISGETSNAAAGRAAALMMMRSGGSGGGGNGASCQDCGNQAKKDCAHVRCRTCCKSRGFDCPTHVRSTWVPAAKRRERQQQLGTVQPQTHLPRGDSGVPKRLRENLPAASSSLVCTRVPTHHNASGILYMYIEYKYQ
	BnaA02g17280D	BnSRS03	MAGFFYLGGRDNINNKQDHHHVDKDHHQQDKSNYLYLYKDEIYNTNKGFEIWPPQYFQQQQEQQQHHVTASTNLYSFGMVPSSSNNNNNNRSRSLYFNVVSDHEPGGFSVTRLGGMNCQDCGNQAKKDCPHLRCRTCCKSRGFHCQTHVKSTWVPAAKRRERLAQHASLQHHSATSRETQNAKAKRLREANGGDNDDKDRSGGSGSALATRLVNANSNSGFGESQNLPPEVSSPAIFRCVRVSSMENDEDEQEYAYQTAVNIGGHVFKGILYDQGLDQDHHHQLDLLASTATTTNAEEIAAKTAVTVAANTNNGLMIDPSSLYPSQLNSFIAGTPFFTPPRS
	BnaA03g59180D	BnSRS04	MAGMFSLGGNNNNNNNNNNGYQEEGNQQQQKTNWVWYRSNTNTNNINPSSSVWQIPPEQQILMHHHQPHPQQQSIDLYPGHQIDVSDIATSSRSITISCRDCGNQAKKDCTHMRCRTCCKSRGFDCSTHVRSTWIPVARRRERQQQLHMSTSGGGGGSGGSSIPKRHRDTTLPETSSSRLPSDSAGLEMGKASFPPEVSSDALFRCVRMSGVDDGGDGQYAYQTTVNIGGHLFKGILYDQGPESSYMSGGSGGSDHHSSSAGGGNTFNTPAIADGGRGGSSAMFVDPNSSSYYSSNMMTMFVPPGTQFYQNPPRS
	BnaA04g04120D	BnSRS05	MLGLRNIILLPPPSQIIHPSVEDNNNNKARNSNVEEKVCRDCGNRAKKECSFERCRTCCKSRGYKCATHVKSTWIPSSSSSHHHHSPSSDRNRKKKLKIDSSNKPTVLIVPTTTSRRQERSFREGLPGKIEAPAVFKRTRVTAISNEEQSEIGYQATVTIHDGVRLCYGGANRATVEARNLASSEAVETDSGSCWSVVEVP
	BnaA04g12150D	BnSRS06	MMMMVTGRRCEDCGNQAKKECVYMRCRTCCKAKAFHCQTHIKSTWVPAYRRSHKHQSQTPPQPQQQPLSITNPKRLIEQHPTSSPSSSGVRIGTSTGHFPAELSSVADFRCVKVSSIDDGKEQYAYQTTVNIGGHVFRGILHDQGLEKVVLDHQPAHHDQALLLPSSSRPLMITSHFTDFMSGTHTKSLH
	BnaA06g13970D	BnSRS07	MAGLFYLGGRENNKQDHHHQDKDHNEDRSNNYLHLYKDEIYNNNKGFEIWPPQYFQQQQEQQNHVAPPTNFYSFGMVPSGSSHNNNRSSNRSLYFNVVSDHEPVRSSTGRFTVTRQGSMNCQDCGNQAKKDCPHMRCRTCCKSRGFDCQTHVKSTWVPAAKRRERQAQLAGLPTKRSREASSGGGDDDDEREGDENGAQGGGGGSALACIRVVNASSSGFESSHLPPELSLPAVFRCMRVSSIDDEDEEYAYQTAVNIGGHVFKGILYDQGPSDDHRYSSSPAAIAAETSQHHLNLLASTSSVATTTGVTASNINNASIDPSSVYTAAPINSFVTAATSFFASPRS
	BnaA07g01860D	BnSRS08	MAGIGSSRNNEEDNQHKTNWLWYRNTVSSNTSHNNQQQIWQQQSLDLYPGQINVCDVTTSSSRSVTISCQDCGNQAKKGCTHMRCRTCCKSQGLDCPTHVRSTWIPAAKRRERQQQIETPTGNRNGRGCGVGNIPKRSWDLPDTLDSPEMDGTAFPEEVSSDAHFRCVRMSGTDDGESQFAYQTTVGIAGHVFKGILYSQGPESMMMPGTQFHDNPSRS
	BnaA07g12710D	BnSRS09	MAGFFSLGNGTGVDGGGSRQDATTTNTNNNSSPSGNESWLWCRNPNSNANAGCGDIAPSYKGTLELWQHSNNQQIIFQQQQQQRLNLYTSAAGLGVGPSNRSLIEASGGEASGLTMMRSGGGGGGPSCQDCGNQAKKDCAHMRCRTCCKSRGLECPTHVKSTWVPAAKRRERQQQLASSQHPQGENVPKRPREHFPVPAKSTSLVCTHNTLGLQVGNFPPEISSSATFQCVRVSSVDEGEDEYAYKTAVSIGGHVFKGILYDQGPAERSSSDGGSQPLNLITAGPSASSSSAKVSCNNGVVGSTSDHYIDPASLNYPTSNNSFITGTHFFSNPRS
	BnaA07g21650D	BnSRS10	MAGFFYLGGRDNNKQDLHQVDKSSYLYLYKDEIYNTNKGFEIWPPQYFQEQHQQHVTAPANFYSFGMVPSGSSSNNNNNNRSRSLHFNVVSDHEPGGFTVTRQGSMNCQDCGNQAKKDCSHMRCRTCCKSRGFHCQTHVKSTWVPAAKRRERLAQLASLQHRSAFSRETQKAKRLREANGGGDNVDKDHSGSAGSAIATRVANANSNSGFEVRQNLPPEVSSPAVFRCVRVNSIEEDEDDQEYAYQTAVNIGGHIFKGILYDQGPEQDHHHQLNLLAPTATTTNAEETAAKTAVTVAGNNNTGLILDPSSLYPVQLSSYISGTPFFTPPRS
	BnaA09g31700D	BnSRS11	MAGFFSLDGGGGRGGGGNGQEEHRTNTNPPPPVSESWLWYRNPNVNANANANANAPSSSNAAALGTLELWQNHNQQEIMFQHQQHQQRLDLYSSAAGLGVGPSSHSQFNISGETSNAGAGVTAAAALMMMRSGGGGGTGVSCQDCGNQAKKDCAHVRCRTCCKSRGFQCPTHVRSTWVPAAKRRERQQQLGTVQPQTHLPRGDSGVPKRLRENLPAASSSLVCTRVPTHHNASGILYMYIEYKYQ
	BnaA09g34300D	BnSRS12	MCFQDNYLIPPEPYSLSLRDFGLVHLQGSTSLLESLLGYKLNAIQLDLKLPLLRVYNLAPTSTRFIITSTVANPPSLFSWPQHHQPPPSSTPFSAVASTVPDHSSTVSAAVISTPDYMLGLRNTLFLNQPPSQITQPSPSPVNFTAADVNNKSSRNSNVEEKVCKDCGNRAKKECLFERCRTCCKSRGYNCATHVKSTWVPSSHHRSVSRSSSSSSDRNKKLKLDSSDKPKSVLIVPTTTSRQETSFKERLPGKIEAPAVFKRTRVTAVSNNEQAEIGYQATVTISGHVFKGFLHYYGVDHNKSFPSLSNK
	BnaA09g43210D	BnSRS13	MMMIMGRRCEDCGNQAKKECVYMRCRTLLQNKILLRQENHTWVPAYRRSQKQQLQTQTHQKGLATINPKRVRIHTSRRHFPAELSSLADFRCVKVSSIDDGKEQYAYQTTVNIGGHVFRGILHDQGLEKVVVDHQSTHHLHNKHHDQGLLPPSSSPCPLMITSPFTDFMSGTRFSSNQKS
	BnaA10g20370D	BnSRS14	MSMVGLRDVYLVAPAYHHHHQNAGVVSGSDQINSNAALGVGMIPLLTAAPPHQQNVEDTDINFLGDSRRWQNNNNSHNQTQYLHFKSAHQTAVASSSNNSGSGSAASGTATCQDCGNQAKKECKQRRCRTCCKSRGFDCSTHVKSTWVSAARRRERQVMPTASTSSGTKKPRIVGSQQQQQATSHTSTSNTPPQSFDTSSSRQDGGPREAWPGQVRAAAVFKCVRVTAVEDGDDEYAYQAVVKIGGHVFKGFLYDQGLEPKEGFPNMSDLHLGGGADNNNGVSVASQPNLDPPPNLYGGGGSGGFYG
	BnaAnng09150D	BnSRS15	MAGFFYLGGRDNNNSKQDHHQVDKDHHHHQDKSNYLYLYKDEIYNTNKGFEIWPPQYFQQQQEQQQHHVTASTNLYSFGMVPSSSNNNNNNRSRSLYFNVVSDHEPGGFSVTRQGGGMNCQDCGNQAKKDCPHLRCRTCCKSRGFHCQTHVKSTWVPAAKRRERLAQLASLQHHSATSRETQNAKAKRLREANGGDNDDKDRSGGSGSALATRLVNANSNSGLEAIQKLPPEVSSPAVFRCVRVSSIEEDEDDQEYAYQTAVNIGGHVFKGILYDQGPDQDHHHQLNLLASTATTTNAEEIAAKTAVTIAGNNNSGLILDPSSLYPTQLNSFIAGTPFFTPPRD
	BnaAnng31570D	BnSRS16	MAGFFYLGGRDNNNSKQDHHQVDKDHHHHQDKSNYLYLYKDEIYNTNKGFEIWPPQYFQQQQEQQQHVTPPSNFYSFGMVPSGSSSGNNNNNRSRGLYFNVVSDHEPGGFTVTRQGGMNCQDCGNQAKKDCPHMRCRTCCKSRGFHCQTHVKSTWVPAAKRRERLAQLASLQHHSASSRETPNANAKRLREVDGGDNDDDKDHNGGGGSSLATRVVNTNSNSGLEAIQKLPPEVSSPAVFRCVRVSSIEEDEDDQEYAYQTAVNIGGHVFKGILYDQGPDQDHHHQFNLLASTATTTNAEEIAAKTAVTIAGNNNSGLILDPSSLYPTQLNSFIAGTPFFTPPRD
	BnaC01g02360D	BnSRS17	MAGMFSLGGNNNNNNGYEEEETQQQQNTNWAWYRSNTNTNSINPSSSLWQIPPEQQLLMHHHQSQPQHQSLDLYPGHQIDVCDVATSSRSITISCRDCGNQAKKDCTHMRCRTCCKSRGFDCSTHVRSTWIPVARRRERQQQVHMSTSGGSGSSVPKRHRDATLPGTSSFRSPSDSAGLEMGEAIFPPEVSSDALFQCVKMSGVDDEEDDGQYAYQTTVNIGGHLFKGILYDQGPESSYVSGTQFYQNPPRS
	BnaC01g31760D	BnSRS18	MAKRMLGEDMSGSAEGVCPAISNAITNLYGLESSHLPPEILPTVFRCTRVSSIDDEDEEYAYQTAVNIGGYVFKGILYDQEILIPHELTFLRFTLWQRLRSILLSPLRTKSGLKRERESIIPKRGKGSIGTGWFVNNYPTRNLQFGMYKIETVNGEISLEPENMGMKEWLKENVKEEEYVVMKAEVEVLEEMMRSKTIKWWISFSWNASHGY
	BnaC02g11580D	BnSRS19	MAGIGSSRNNEEDNQHKTNWLWYRNTVSSNTSHNNQQQIWQQQSLDLYPGKINVCDVTTSSSRSATISCQDCGNQAKKGCTHMRCRTCCKSQGLDCPTHVRSTWIPAAKRRERQQQIETPTGNRNGRGCGVGNIPKRSWDLPDTLDSPEMDGTAFPEEVSSDAHFRCVRMSGTDDGESQFAYQTTVGIAGHVFKGILYSQGPESMMMPGTQFHDNPSRS
	BnaC02g24360D	BnSRS20	MAGFFYLGGRDNINNKQDHHHHVDKDHHQQDKSNYLYLYKDEIYNTNKGFEIWPPQYFQQQQEQQQHHVTASTNLYSFGMVPSSSNNNNNNRSRSLYFNVVSDHEPGGFSVTRQGGMNCQDCGNQAKKDCPHLRCRTCCKSRGFHCQTHVKSTWVPAAKRRERLAQLASLQHHSATSRETQNAKAKRLREANGGDNDDKDRSGGSGSALATRLVNANSNSGFEESQNLPPEVSSPAVFRCVRVSSMENDEDEQEYAYQTAVNIGGHVFKGILYDQGLDQDHHHQLDLLASTATTTNAEEIAAKTAVTVAANTNNGLMIDPSSLYPSQLNSFIAGTPFFTPPRS
	BnaC04g26320D	BnSRS21	MLGLRNIILLPPPSQITHPSVEDNNNNKARNSNVEEKVCRDCGNRAKKECLFERCRTCCKSRGYKCATHVKSTWIPSHHHRSPSSSSDRNRNKKLKIDSSDKPSVLIVPTTTSRRQERSFKEGLPGKIEAPAVFKRTRVTAISNEEQSEIGYQATVTIHGHVFRGFLHYHGVDHNKAFPCLSKKLCDGGANRATVEARVRYYTDYCRQLVQQGVSMSF
	BnaC06g22330D	BnSRS22	MAGFFYLGGRDNNKQDLHQVDKSSYLYLYKDEIYNTNKGFEIWPPQYFQEQHQQHQQQHVTAPANFYSFGMVPSGSSSNNNNNNRSRSLHFNVVSDHEPGGFTVTRQGSMNCQDCGNQAKKDCPHMRCRTCCKTRGFHCRTHVKSTWVPAAKRRERLAQLASLQHRSAFSRETQKAKRLREANGGGDNVDKDHSGSAGSAIATRVPNANSNSGFEVSQNLPPEVSSPAVFRCVRVSSMEEDEDDQEYAYQTAVNIGGHIFKGILYDQGPEQDHHHQLNLLAPTATTTNAEETAAKTAVTVAGNNNTGLILDPSSLYPVQLSSYISGTPFFTPPRS
	BnaC06g43960D	BnSRS23	MAGFFYLGGRDNNSSKQDHHQVDKDHHHHQDKSNYLYLYKDEIYNTNKGFEIWPPQYFQQQQEQQQHVTPPSNFYSFGMVPSGSSSGNNNNNRSRGLYINVVSDHEPGGFTVTRQGGMNCQDCGNQAKKDCPHMRCRTCCKSRGFHCQTHVKSTWVPAAKRRERLAQLASLQHHSASSRETPNANAKRLREVDGGDNDDDKDHNGGGGSSLATRVVNTNFNSGLEAIQNLPPEVSSPAVFRCVRVSSIEEDEDDQEYAYQTAVNIGGHVFKGILYDQGPDQDHHHQLNLLASTATTTNAEEIAAKTAVTIAGNNNSGLILDPSSLYPTQLNSFITGTPFFTPPRD
	BnaC07g03690D	BnSRS24	MAGIGSSRNNEEDNQHKTNWLWYRNTVSSNTSHNNQQQIWQQQSLDLYPGKINVCDVTTSSSRSVTISCQDCGNQAKKGCTHMQCRTCCKSQGLDCPTHVRSTWIPAAKRRERQQQIETPTGNRNGRGCGVGNIPKRICATLLGLEMDETTFPEEVSSDALFRCIRMSGTDGESHFAYQTTVGIAGHVFKGILYSQGPESMIMPGTQFHENPSRS
	BnaC07g05440D	BnSRS25	MNCQDCGNQAKKDFPYMRCRTCCKSRGFDYQTHVKSTWVPAAKRRERQAQLACLPTKRSREASSGGGDDDDDENGAQGGGGGSALACIRVVNASSSASSVATTTAVTASNINSATVDLSSAYTSAAAPINSFITSGTSLLHLLEDYEYQKNYFEGFVVVRQYDPLVQDPLGRDDTERDDESNGKTFDWSEKRSSSQLKRAQELKRESIIPKRIGTGWFVNNYPTKNLKFEMYKIEMVNGEMSLEPGNLGMKEWLKENVKEEEHVVMKAEVGVLEEMMRSKTIKWWISLLGMQANRAN
	BnaC07g15630D	BnSRS26	MAGMFNLGGRDNNKQDHLHHHMDKDHNEDKSSNHLYLYKEEIYNNNNRGFEIWPSQHFQQQQQNHVAPPTNFLSFGMVPSGGSNNNDRSSNRSLYFNVVSDHERIRSSTGTFTVSRQGNMNCQDCGNQAKKDCPHMRCRTCCKSRGFDCQTHVKSTWVPAAKRRERQAQLAALPAKRSREPSSDDDENGGQGGGGGSALACIRVVNASSSGLESNHLPPEISSPAVFRCIRVSSIDDDDEEYAYQTVVEIGGHVFKGILYDQGPSDHPYSSSPAAAEACQRHINLLASTALASTSTTATNNTKASIDPSSLYTPTAAPFSTCITTGTPFFPPPRS
	BnaC07g16800D	BnSRS27	MAGFFSLGNGAGVDGGGSRQDATTTNRNNNPSPSGNESWLWCRNPNSNTNANVGCGDIAPSYKGTLELWQHPNNQQIIFQQEQQQRLDLYTSAAGLGVGPSNRGLIETSGGGASALMMMRSGGGGGGPSCQDCGNQAKKDCAHMRCRTCCKSRGLQCPTHVKSTWVPAAKRRERQQQLASSQQPQGESVVPKRPREHFPMPARSTSLVCTHNTSGLQVGNFPPEISSSATFQCVRVSSVDEGEDEYAYKTAVSIGGHVFKGILYDQGPAERSSSGGGSQPLNLITAGPSASSSSANVSCNNGVVGSTSDHYIDPASLNYPTPNNSFITGTHFFSNPRS
	BnaC08g25250D	BnSRS28	MKRILSRNKPSRYIDCLFVCILIVVGGDDSYLGTMCFHDNYLIPPEPYSFSLRLCPITAWDFGLVHLQGSTSLLESLLGYKLNAIQLDLKHHQPSPSSTPFSAVASTVPDHSSAAVISTPDYMLGLRNTVFLNQPPSQITQPSLVNFTGADVNNKSSRNSNVEEKVCKDCGNRAKKECLFERCRTCCKSRGYNCATHVKSTWVPSSHRRSVSRSSSSSSDRNKKLKLDSSDKPKSVEIVPTTTSRQETSFKEGLPGKIEAPAVFKRTRVTAVSNNEQAEIGYQATVTISGHVFKGFLHYYGVDHNKSFPCLSNK
	BnaC08g35730D	BnSRS29	MMMIMGRRCEDCGNQAKKECVYMRCRTCCKTKSFHCQTHIKSTWVPAYRRSQKQQLQTQTQPHQKGLATINPKRVRIHTSTRHFPAELSSLADFRCVKVSSIDDGKEQYAYQTTVLERTRFQRHSSRSRP
	BnaC08g48470D	BnSRS30	TSSSLVCTRVPTYHNASGLEVGDFPAEVSSPAVFRCVRVSSVEDGEEEFAYQTAVSIGGHVFKGILYDNGPGSIGGGSYNVGESSSGGGGAQQMNLITAGSVTVATASSSTPNAGGIGGSSAAYTDPAALYPTPINTFMAGTQFFPNPRS
	BnaC09g44400D	BnSRS31	MGMVGLRDVYLVAPGYHHQNAGVVSGSDQINSNASLGVGMIPLLTAAPPHQQNVEDTDINFLGDSRRWQNNNSNQTQYLHFKSAHQTAVASSSNNSGSGSAASGTATCQDCGNQAKKECKQRRCRTCCKSRGFDCSTHVKSTWVSAARRRERQVMPTASTSSGTKKLRIVGSQQQQQATSHTSTSNTPPQSFDTSSSRRDGGPREAWPGQVRAAAVFKCVRVTAVEDGDDEYAYQAVVKIGGHVFKGFLYDQGLEPKEGFPNMSDLHLGGGADNNNGVSVASQPNLDPPPNVYGGGGSGGFYG
	BnaCnng57210D	BnSRS32	MAGLFYLGGRDNNKQDHHHQDKDHNEDRSNNYLHLYKDEIYNNNKGFEIWPPQYFQQQQEQQNHVAPPTNFYSFGMVPSGSSHNNNRSSNRSLYFNVVSDHEPVRSSTGRFTVTRQGSMNCQDCGNQAKKDCPHMRCRTCCKSRGFDCQTHVKSTWVPAAKRRERQAQLAGLPTKRSREASSGGGDDDDEREGDENGAQGGGGGSALACIRVVNASSSGFESSHLPPEVSLPAVFRCMRVSSIDDEDEEYAYQTAVNIGGHVFKGILYDQGPSDDHRYSSSPAAVAAETSQHHLNLLASASSVATATGVTASNINNASIDPSLVYTAAPINSFVTAATSFFASPRS
	BnaCnng61180D	BnSRS33	MAGMFSLGGNNNNNNGDQEEGNQQQQKTNWVWYRSNTNTNNINPSSSVWQIPPEQQILMHHHQPHPQQQSIDLDPGHQIDVSDISTSSRSITISCRDCGNQAKKDCTHLRCRTCCKSRGFDCSTHVRSTWIPVARRRERQQQLHMSTSGGGGRGGSGGLSIPKRHRDTTLPGTSPSRLPSDSAGLEMGKATFPPEVSSDALFRCVKMSGVDEGGDGQYAYQTTVNIGGHLFKGILYDQGPESSYMSGGSGGSDHHSSSAGGGNTSNTPAIADGGRGGSSAMFVDPNSGSYYSSNMMTMFVPPGTQFYQNPPRS
	BnaCnng70210D	BnSRS34	MLTLWYTESISEPVSHFFGKQNREGLQASGATRTSAGAVATTRRHNLPTSDSGAFTDWTAAATTSSRATEDLSLGFNAGPAVVHGGLASASAAAGVPSWPPGSSVRYSLPSSAATEMGMVGLRDVYLVAPAYHHHQNVGLVAGSDQINSNAAAASLGVGVIPLLTAAQAQQQHQIVEDTDINFLGNSRRWQNNDSSNNQTEYLHFKSTTVASTSNNSGSGSAGTATCQDCGNQAKKECKQRRCRTCCKSRGFDCSTHVKSTWVSAARRRERQVMPTTAGSSPSTSSGTKKPRIAGAQQQATSHTSTSNTPPQSFDTSSSQKGIITFY
Watermelon (Citrullus lanatus)	Cla97C01G019470.2	ClaSRS01	MRMEIGKRKEGRIESVINAAINHQPAASSSRNCCTSLAPPIQAEGFHPLIMDFRFWVRATMSGFFTLGGGGGGGGGGREEHQENQQNNRPNEIIPPDSSLFWYKGNVEVWQQQQQQHHHHHHHHHHHQEQALFQTQSRTTPYSAPLGVRSSDESSSRSGNFMMISSGSGGGGISCQDCGNQAKKDCSHMRCRTCCKSRGFHCETHVKSTWVPAAKRRERQDKLAALQSHHPHQLHLHGDNNPKRHRDYNPTSSSSLACTLIPTNNNTSGTKYNHPFSLHFYFLRLRMSNFSSLYSKPHHLFLPLLYLLFFRLEIGNFPAELNSPAVFRCVRVSSTDDTDDQYAYQTAVNIGGHVFKGILYDQGPENNYIPPAETSSGGGGSSSGVQPLNFIAGAADATA…
	Cla97C02G048970.2	ClaSRS02	MEVVATTRRLPSDSGAFADWAAPSSSAARAAPDDLSLGFNAGPSAGPPPGPPVSMWSAAAQRSLNYGLGSEMGMVGLRDVYVVAPASTFNPNPHPHDANLMSDPHSLAVSNPATALGVGVGVGVIPLLTAGPCLGVEEDNLLGNRSSSRGGGIQLWQQNQQSSQHYLKKTASSSLDHHLHNASATNNELIGGGIGGSSGLASSTSATTTCQDCGNQAKKDCSHRRCRTCCRSRGFDCATHVKSTWVPAARRRERQLMAVTATAAAGSSGSTSGAKKPRLIASQTTSHTSTSNTTPPRSLDTSSNAGFKEALPSQVQARAVFKCVRVTAVDDGDDEYAYQAVVKIGGHVFKGFLYDQGVEAGDGFPNVSELHLGDGGGGSRNNRNGSSSSPLVDPSDVYN…
	Cla97C03G062920.2	ClaSRS03	MGQFLSRYGDQKRKINLGFFFFFAGDLPAVAAARRLPSDSGAFADWVAPPSAIVADELSLGFNSAATVPPARMWPSSRPLAVGYGHTAAPAPDMVGLMASGFGVGVSVLPLLTGLAPSSVGIEEANLMISRGSSSGGVQFNGNNLDGFGILGGGSSSLNSGAGTCHDCGNQAKKDCSHRRCRSCCKSRGFDCSTHVKSTWVPAARRRERQMLGGASEAAAGGTSSGSTSGGKKPRLIASQTTTNSHTSTSNTPTPSFDASSGQIPLTADMSSKKAKKLPEQIRAPAVFKCVRVTAVEGGSGGGGNEYAYQAVVKIGGHIFKGYLYDHGVEAARDGFPTLSNLHLGDGGSASSPVIDPADVYGSSAARGGGLAGGSGYGNPIN
	Cla97C05G099960.2	ClaSRS04	MTDLFYLDRKQEEDPEERARSEQQLFLYSRSNNNQEIYSTGLQIWPQYTHNHHHPQQQQNVENYISFGVGPSRTTSFMINGSDHDFTSRSGFTMMRHGHGGGSGGASGMNCQDCGNQAKKDCSHLRCRTCCKSRGFHCQTHVKSTWVPAAKRRERQQQRHQQFRTDQSDQITPKNHRQHQLSLPLTTNSGLEVANFQGEFNSSAVFRCVKVSAIDNVEEQLAYQTAVNIGGHMFKGILYDQGPESSQNLSTGGDDREDGGQGLDLVIGASNSGGRVNQTTPFVESSMYPIPINTFERSSTESCGSTWLTYC
	Cla97C05G109100.2	ClaSRS05	MCGSYWNILNPREQNTTMLGLRDVLFIAPTPSSLHQQTQIISSDHHPSLPLPSSTALGVSVGIFPLLAATPCLPPSQPPPNQTADDGSERSRGLENLKRTQDFGFGKGDSLISGAGNNGSDEQVKGDGGDGSMAVCRDCGNRAKKECEYRRCRTCCKGRGNHCSTHVKSTWVPAARRRERQMLVVMDGVASASGDGGSSGSSSAGAKRPRVLIPSQSVTAAAASTSNATTPRSFETTSSHQDASFKKSLPGHVRAPAVFRCHRVTAISSGEGELAYQATVNIGGHVFKGFLYDQGADDKNAFPSISHLHLERGNHHRE
	Cla97C07G135860.2	ClaSRS06	MKNMAGFFPLGGAGSSGRGSNYHLPTTTTSITTSGGEIIHPNEGLFWYKNYERLETWEEQQQPQEQGGEGFVYSGDESPARSSLVMVRSGRGGGGGHVTSCQDCGNQAKKDCVYMRCRTCCKSRGFECETHVKSTWVPASKRRDRHLRCLASNPKRPKDNPAASSGLEMGNFPVEVNSTAVFRCVRMTTLDETNDQYAYQTAVNIGGHIFKGILYDHGPEQQLQQQPPTSASPDASALLITTAESAALLDPPPQYPTPLSTYIATGTQFFLPPTS
	Cla97C08G158100.2	ClaSRS07	MEFCSKLVLVSGGREGPPNKQEEEEEREQNLFLYRNEEIYNKGFEIWPQQYNNNNNHQQQQPNPSLTNHLSFGVGPSRRSFMINDPSDEPSRSAFTVMRPAAAAFAAASAATAGGMNCQDCGNQAKKDCAYLRCRTCCKSRGFQCQTHVKSTWVPAAKRRERQQQIAALQQQQQQQEQFRGGENSKRQRETQTAAAVTAATASASACPRLPSITSGLELAQFPSEVNSPAVFRCVKVSAMDDADEEFAYQTAVNIGGHVFKGILYDQGPEIRYTAAGESSSGHGGDGSTHPLNLIAGPTSATTSAATSTNPSAAAAAAPLLDPSIYPAPLNAFMAGTQFFPPSREMRRCSYEEDMMRRN
	Cla97C09G176200.2	ClaSRS08	MKGLLYLAGKQEEDEEEMMRGREQELFLYGKNNNEEMYSKGLEIWPQQNVENYISFGVGPTRRNLIINASDHEFVSRLGFSMMRGGGGGGMNCQDCGNQAKKDCSHLRCRTCCKSRGFQCQTHVKSTWVPAAKRRERQQQRHHILQHHHPQSDHITSKRHQQNQPPLPIPTLTSGLEVAHFPAEFNSPAVFRCVKVSAIDNVEEQLAYQTSVNIGGHMFKGILYDHGPESSQNTSVGGESSYCHSGEDGGQALDLVIGASNGGGRVNQSSSAAFVESSLYPIPINTFSTAFFFLTSSVGSSLLLLQSSFLLISLRSLFISLLIYLLSLISLLICHYRCHFSSSSQIIPFSFSRRRRHCRRLAAAASATAAAAPPYCRRHIHSDIDVEIDELFGEEGNIE…
Pumpkin (Cucurbita maxima)	CmaCh01G019390.1	CmaSRS01	MTGLLYLGGKQEDDQEQRGREQQLFLYNSRNNEEIYSKGLEIWPQYGQQHQAVENYISFGVGPSRMNLMINASDHEFTMMRQGAATGGGGGGINCQDCGNQAKKDCSHLRCRTCCKSRGFQCQTHVKSTWVPAAKRRERQQQRQQQFRPDQFDQTTHKCHRETQPSIPPATVTSGLELAHFPAEFNSPAVFRCVKVSAIDNVEEQLAYQTAVNIGGHMFKGILYDHGPETSQNLSTGGESSYSHGGDDDGQGLDLVIGASNSFGRVNPSASFVESSLYPIPINTFTPGMQNFPSSRT
	CmaCh02G012730.1	CmaSRS02	MWSAAAASQRSLNYGLGSEMSMVGLRDVFVVAPASSFNPNPHPHDNNLLSDPHSLAVSNPATALGVGVIPLLTAGPCLGVEEDNLLSNRSSNRGGGIQLWQQNHYLKKMPSSLDNHLHNPSAANNGLIDDGIGITGGLASSSSATTTCQDCGNQAKKDCSHRRCRTCCRSRGFDCTTHVKSTWVPAARRRERQLMGVAANAAAGSSGSTSGAKKPRLIASQTTSRTSTSNTTPPRSLDTSSSHQDAGFPEALPGQVRAPAVFKCVRVTAVDDGDDEYAYQAVVKIGGHIFKGFLYDQGVEPGDEFPNVSELHLGDGGGLTRNNRNGVSSSSPLVDPSDVYNAAATGGGAPCFLGGSNYGNQIS
	CmaCh03G007080.1	CmaSRS03	MSGFFSLGGGGREDHQDHQQNNDTNPETLFWYKGNVELWQQQQHHHHPQQEQPLFQTQSRIPYSAPLPVRTSDESSSRSGNFMMIGSGSGGGGISCQDCGNQAKKDCAHMRCRTCCKSRGFHCETHVKSTWVPAAKRRERQEKLAALQTQHQLHLHGDNNPKRHRDYNPTSSSSLACTLIPNNTSGLEIGNFPAELNSPAVFRCVRVSSTDESDDQYAYQTAVNIGGHVFKGILYDQGPETNYIPPAETSSGGGGGGGGGSSSGVQPLNFITGATDATTASGGSSAALPLLDPSSLYSTPLNSFMAGTQFFLPPRS
	CmaCh04G007690.1	CmaSRS04	MAGFFPLGGGREPNYHLPTTTTTDGLFWYRNYESLGIWQQQQVQQQAGEGFVYSGDESPPRSSLVMLRSGRNGGGQVISCQDCGNQAKKDCLHMRCRTCCKSRGFDCETHVKSTWVPASKRRERHLRSDATNLKRPRDNTAASSGLEMGNFPMEVSSTAVFRCVRMTTLDETNDQFAYQTAVNIGGHTFKGILYDHGPEQQQQPPPPPNSASPDGGALLITAPTTTMELPPISAALLDPPPPYPAPLNTYVAAGTQFFLPPTS
	CmaCh04G013270.1	CmaSRS05	MLGLRDVLFIAPTPSSLHQHTQIISSDHHPSLPLPSSTALGVSVGIFPLLAATPCLQPPPNQMPDEVSDRCRSLENLKRTQDFGFGKGDSLIGGGGNHGYDDQVKGDGGDGSLGVCRDCGNRAKKECEYRRCRTCCKGRGNHCSTHVKSTWVPASRRRERQMLVVMDGVATSGSSGSSSAGAKRPKVLIPSQTAAAASTSNATTPRSFETTSSHQDASFKKSLPGQVRAPAVFKCHRVTAISSGVGELTYQATVNIGGHVFKGFLYDQGADVKNALPSISHLHLESVFVALS
	CmaCh05G002810.1	CmaSRS06	MAGFFYLGGGREGPPNKQEEEEEREQNLFMYRNEEIYNKGFEIWPQQYTNHHQNPSLTDHLSFGVGPSRRSFMINDSDEPSRSAFTVMRPAAAFAASAAAAAAGGGMNCQDCGNQAKKDCAYLRCRTCCKSRGFQCQTHVKSTWVPAAKRRERQQQIAALQQQQQQEQFRGGENSKRQRETQITTTVSAATASATACPRLPSITSGLELAQFPSEVNSPAVFRCVKVSAMDDADEEFAYQTAVNIGGHVFKGILYDQGPEVRYTAAGESSSGHGGDGSTHPLNLIAGSSNAGPTSASTSAATSTNPSAAAPLLDPTIYPAPLNAFMAGTQFFPPSRS
	CmaCh07G004520.1	CmaSRS07	MSMSGFFTLGSTDQEHQQTDTNRPNQTLPPDTLFWYKPGSVELWQPQQHQQHQQQSLFQTRSHNNNNNNNNNLYSDESSSRSGNLMMISSGSGGGGISCQDCGNQAKRDCTHMRCRSCCNTRGFPCQTHVKSTWVPAAKRRQRQQKLAALQTHPKRHTDNIPTTNTSGLEIGNFPAELNSPAVFRCVRLSSTDDTDDQYAYQTAVNIGGHVFKGILYDQGPENNYVPGETSSSGGGGLQPLNFIAGAADANAASSAALPLLDPSSLYSAPLNSFMAGTQFFLPPRS
	CmaCh11G008840.1	CmaSRS08	MFLFCLQLGFFFLAGDSSAVAAARRLPSDSGAFADWAAPPTADDELSLGFNSAAAVPVARMWPSSSSSRPIAGAYGHTAPPPTDMVGLMASGYGVGLSVLPLLTGIAPSSVGIEETNLMISRGGGGDGGGGGGGVQFHGNNFDGFGFLGGGSSLNSGVGTCHDCGNQAKKDCNHRRCRSCCKSRGFDCATHVKSTWVPAARRRERQVLSAAAAAAATGGTSSGSTSGGKKPRLIASQTTTNSHTSTSNTPTRSFDTCSVFKCVRVTAVEGGGSGGNEYAYQAVVKIGGHVFKGYLYDHGVEAREGFPMLSDLHLGGGGDGGSTSSPIIDPSDVYGSSAGRGGGLAGGSGYVMNSFDEISELQYDMFSRNMDDSESSRVLEIYVHHARNIHNICIYENQD…
	CmaCh12G004300.1	CmaSRS09	MAELFYVGGREEGPPNKEQEQQKQTQPTLFMYRNDQQIHHKGFEIWPPHYQTHFSSAVGQSHRTDSDHPSRSAFTATRPAAAIAGGINCQDCGNQAKKDCAYLRCRTCCKSRGFHCQTHVKSTWVPAAKRRERQFRGGDNSKRLRETQSATATATLHLPSSFTSELEKFPSEVNSPAVFRCVKVSAMDDEDEEFAYQTAVNIGGHVFKGILYDQGSEVHYTAGESSSGHVGDGSVHPLNLIAGPSNAAAASTTTSAATSSNPTATAAAVASLLDPPIYPAPLNAFIAGTQFFPPSRS
	CmaCh16G006400.1	CmaSRS10	MAALQNYESFETEQQQQGGERFGYSGENSPARSSLVMVRSGGDGGGGKVISCQDCGNQAKKDCVHMRCRTCCKSRGFLCETHVKSTWVPASKRRERLISTTGGDSKRPRDTHATSSGFEIGNFPAEINSTAVFRCVRMTTLDEPTGTDQYAYQTAVNIGGHIFKGILHDHGPDQQQHHHNPPISASPDGGALLITTADSAALLDPPPSYPAPLSSYITAGTQFFQPPTS
	CmaCh18G008580.1	CmaSRS11	MLGLRDVLFLAPTSTSDHHPSLPLHSPAALGVSVGIFPLLAATPSLPPPPPPPPPNRTAEEVSDRTRSSENLKRTHDFGFGKGDSFIAGDKGDAGESSMAVCRDCGNRAKKECEYRRCRTCCKGRGNHCSTHVKSTWVPASRRRERQMLVVMDGVATASGDGGSSGSSSAGAKRPRVLIPSQSTPPAAASHASASIATTSRSFETTSNHQDASFKKSLPGQVRTPAVFRYHRVTAISSGEGELAYQATVNIGGHVFKGFLYDQGVVDHKNGYPSLSHLHLESGSHHRE
	CmaCh19G002830.1	CmaSRS12	MTGLFYLSEKQEENQEQRGKEQQLFLSKGLEIWPQQNLENYISFGVGPSRRNFMINASDGHDQFVPRLGFSINCQDCGNQAKKDCSHLRCRTCCKSRGFHCQTHVKSTWVPATKRRERQLQRHQIVRQQSRLDRPDQTTSKRHGENQSLCVAPIDTSGLEVVNFPAEFNSSAVFRCVKVSAIDDVEEQLAYQTSVNIGGRMFKGILYDQGPKSTLNLSTGGESSYCYGGEDDSQALELVIGASNGGWRSNKPTPFMESSLYPIPINTFTTGTQNFPSSRT
	CmaCh20G001080.1	CmaSRS13	NQRAAEAEADADAEAEAEAALQKQQHSSVVATTRRLPSDSGAFADWAAPSSSAGRAPPDDLSLGFNATPAVAPIAGPPAPMWSAAAAAQRSLNYGLGSEMGMVGLRDVYVVAPAASFNPNPHHHDPNLISDDHSLAVSNSATALGVGVGVGVIPLLTAGPCLGVEEDNLLGSRSGSRGGGIQLWQQNQQSTQHYLKKTPSSSLDHHLHNASGTNDLIGGGIGVFGGLASSSSATTTCQDCGNQAKKDCSRGRCRTCCRSRGFDCATHVKSTWVPAARRRERQLMAITGTAADGSSGSASGTKKPRLIASQTTSHTSTSNTTPPGSIDTSSSHQDAGFKEELPGQIRAPAVFKCVRVTAVDDGEDEYAYQAVVKIGGHVFKGFLYDQGVDAGDGFPNVSE…
Moschata pumpkin (Cucurbita moschata)	CmoCh01G020010.1	CmoSRS01	MTGLLYLGGKQEDDQEQRGREQQLFLYNNRNNEEIYSKGLEIWPQYGQQHQAVENYISFGVGPSRMNLMINASDHEFTMMRQGAATGGGGGGINCQDCGNQAKKDCTHLRCRTCCKSRGFHCQTHVKSTWVPAAKRRERQQQRQQQQFRPDQFDQTTPKRHRETQPSIPPAAVTSGLELAHFPAEFNSPAVFRCVKVSAIDNVEEQLAYQTAVNIGGHMFKGILYDHGPESSQNLSTGGESSYSHGGDDDGQGLDLVIGASNSFGRVNPSASFVESSLYPIPINTFTPGMQNFPSSRT
	CmoCh02G013150.1	CmoSRS02	MWSAAAASQRSLNYGLGSEMSMVGLRDVFVVAPASSFNPNPHHHDNNLLSDPHSLAVSNSATALGVGVIPLLTAGPCLGVEEDNLLSNRSSNRGGGIQLWQQNHYLKKMPSSLDHHLHNPSAANNGLIDDGIGITGGLASSSSATTTCQDCGNQAKKDCSHRRCRTCCRSRGFDCTTHVKSTWVPAARRRERQLMGVTANAAAGSSASTSGAKKQRLIASQTTSRTSTSNTTPPRSLDTSSSHQDAGFPEALPGQVRAPAVFKCVRVTAVDDGDDEYAYQAVVKIGGHIFKGFLYDQGVEPGDEFPNVSELHLGDGGGITRNNRNGVSSSSPLVDPSDVYNAAATGGGGAPCFLGGSNYGNQIS
	CmoCh03G007340.1	CmoSRS03	MSGFFSLGGGGREEHQDHQDHQEHQQNNDTNPETLFWYKGNVELWQQQHHHHQHPQQEQPLFQTQSRTPYSAALPVRTSDESSSRSGNFMMIGSGSGGGGISCQDCGNQAKKDCVHMRCRTCCKSRGFHCETHVKSTWVPAAKRRERQEKLAALQTQHQLHLHGDNNPKRHRDYNPTSSSSLACTLIPNNTSGLEIGNFPAELNSPAVFRCVRVSSTDESDDQYAYQTAVNIGGHVFKGILYDQGPETNYIPPAETSSGGGGGGGGGSSSGVQPLNFITGATDATTASGGSSAALPLLDPSSLYSTPLNSFMAGTQFFLPPRS
	CmoCh04G008220.1	CmoSRS04	MAGFFPLGGGREPNYHLPTTTTTTTDGLFWYRNYESLGIWQQQQVQQQAGEGFVYSGDESPPRSSLVMLRSGRNGGGQVISCQDCGNQAKKDCLHMRCRTCCKSRGFDCETHVKSTWVPASKRRERHLRSDGTNLKRPRDNTAASSGLEMRNFPVEVSSTAVFRCVRMTTLDETNDQFAYQTAVNIGGHTFKGILYDHGPEQQQQPPPPPPNSASPDGGALLITAPSTTMELPPISAALLDPPPPYPAPLNTYVAAVYQRCLKVQFNVSVGSRFQSFSIPKSSRSFKFGLVGGGRVVAGSGYVLVVHTIFLHQNCSDRKHLITLEMGSSNDPENQMMIEGNVVQKMKIDPERARFPCCIVWTPLPVISWLIPFIGHIGIGREDGVILDFAGPNFVCVDN…
	CmoCh04G014000.1	CmoSRS05	MDISLCCFHLILISGLLEAERFWVPLRRGVAEESENRKKKEAWWRSRVRLTLFHSQSQFPDLSFSFCVNTTMLGLRDVLFIAPTPSSLHQHTQIISSDHHPSLPLPSSTALGVSVGIFPLLAATPCLQPPPNQMPDELSDRSRSLENLKRTQDFGFGKGDSLIGGGGNHGYDDQVKGDGGDGSLGVCRDCGNRAKKECEYRRCRTCCKGRGNHCSTHVKSTWVPASRRRERQMLVVMDGVATSGSSGSSSAGAKRPKVLIPSQTTAAAAAASTSNATTPRSFETTSSHQDASFKKSLPGQVQAPAVFKCHRVTAISSGEGELTYQATVNIGGHVFKGFLYDQGADVKNALPSISHLHLESGNHLRD
	CmoCh05G002870.1	CmoSRS06	MAGFFYLGGGREGPPNKQEEEEEREQNLFMYRNEEIYNKGFEIWPQQYTNHHQNPSLTDHLSFGVGPSRRSFMINDSDEPSRSAFTVMRPAAAFAASAAAAAGGGMNCQDCGNQAKKDCAYLRCRTCCKSRGFQCQTHVKSTWVPAAKRRERQQQIAALQQQQQQEQFRGGENSKRQRETQITTAVSAATASATACPRLPSITSGLELAQFPSEVNSPAVFRCVKVSAMDDADEEFAYQTAVNIGGHVFKGILYDQGPEVRYTAAGESSSGHGGDGSTHPLNLIAGSSNPGPTSASTSAATSTNPSAAAAPLLDPTIYPAPLNAFMAGTQFFPPSRS
	CmoCh07G004500.1	CmoSRS07	MSMSGFFTLGSTDQEHQQPDTNRPNQTLPPDTLFWYKPGSVELWQPQQHQQQSLFQARSHNNNNNNNLYSDESSSRSGNLMMISSGSGGGGISCQDCGNQAKKDCTHMRCRSCCNTRGFPCQTHVKSTWVPAAKRRQRQQKLAALQTHPKRHTDYNIPTTNTSGLEIGNFPAELNSPAVFRCVRLSSTDDTDDQYAYQTAVNIGGHVFKGILYDQGPENNYLPGETSSGGGGGLQPLNFIAGAADANAASSAALPLLDPSSLYSAPLNSFMAGTQFFLPPRS
	CmoCh11G008930.1	CmoSRS08	MWPSTSSTRPIAGAYGHTAPPPTDMVGLMASGYGVGLSVLPLLTGLAPSSVGIEETNLMISRGGDGGGGGGGVQFHGNNFDGFGFLGGGSSLNSGVGTCHDCGNQAKKDCNHRRCRSCCKSRGFDCATHVKSTWVPAARRRERQVLSAAAAAAATGGTSSGSTSGGKKPRLIASQTTTNSHTSTSNTPTRSFDTCSAADMSYKRAKKLPEQVRAPAVFKCVRVTAVEGGGTGGNEYAYQAVVKIGGHVFKGYLYDHGVEAREGFPMLSDLHLGGGGDGGSTSSPIIDPSDVYGSSAGRGGGLAGSSGYGNPIN
	CmoCh12G003810.1	CmoSRS09	MYRNDQQIHHKGFEIWPPHYQTHFSSAVGQSRRTDSDHPSRSAFTATRPAAATAGGINCQDCGNQAKKDCAYLRCRTCCKSRGFHCQTHVKSTWVPAAKRRERQFRSGDNSKRLRETQSATATATPRLPSSFTSELEKFPSEVNSPAVFRCVKVSAMDDEDEEFAYQTAVNIGGHVFKGILYDQGSEVHYTAGESSSGHGGDGSVHPLNLIAGPSNAAAASTTTSAATSSNPTATAAAVAPLLDPSIYPAPLNAFMAGTQFFPPSRS
	CmoCh18G008640.1	CmoSRS10	MLGLRDVLFLAPTSTSDHHSSLPLHSPAALGVSVGIFPLLAATPSLPPPPQPPPNQTAEEVSDRTRSLENLKKTHDFGFGKGDSFIAGDKGDAGESSMAVCRDCGNRAKKECEYRRCRTCCKGRGNHCSTHVKSTWVPASRRRERQMLVVMDGVATASGDGGSSGSSSAGAKRPRVLIPSQSTPAAASHASASIATTSRSFETTSNHQDASFKKSLPGQVRAPAVFRYHRVTAISSGEGELAYQATVNIGGHVFKGFLYDQGVVDHKNGYPSLSHLHLESGSHHRE
	CmoCh19G003110.1	CmoSRS11	MTGLFYLSEKQEENQEQRGREQQLFLSKGLEIWPQQNLENYISFGVGPTRRNFMINASDRPDQFVPRLGFSINCQDCGNQAKKDCSHLRCRTCCKSRGFHCQTHVKSTWVPATKRRERQLQRHQIVRQQSQLDQPDQTAPVDTPGLEVANFPAEFNSSAVFRCVKVSAIDDVEEQFAYQTSVNIGGHMFKGILYDQGPESTPNLSTGGESSYCYGGEDDNQALELVIGASNGGWRSNKPTPFMESSLYPIPINTFNTGTQNFPSSRT
	CmoCh20G001160.1	CmoSRS12	MWSAAAAAQRSLNYGLGSEMGMVGLRDVYVVAPAASFNPNPHHHDPNLISDDHSLAVSNSATALGVGVGVGVIPLLTAGPCLGVEEDNLLGSRSGSRGGGIQLWQQNHQSTQHYLKKTPSSSLDHHLHNASGTNNDLIGGGIGVFGGLASSSSATTTCQDCGNQAKKDCSRGRCRTCCRSRGFDCATHVKSTWVPAARRRERQLMAITGTAADGSSGSASGTKKPRLIASQTTSHTSTSNTTPPGSIDTSSSHQDAGFKEELPGQIRAPAVFKCVRVTAVDDGEDEYAYQAVVKIGGHVFKGFLYDQGVEAGDGFPNVSELNLSDGGGGSRNNRNGSSSAPFVDPSDVYNAAASGNGGAPGFLGGSNYGNQIR
Melon (Cucumis melo)	MELO3C018686.1	CmSRS01	MRGLLYLGGKQEEDEEEILRSGREQQLFLYSSTNNHNNEEIYSKGLEIWPQQNVENYISFGVVGPTRKNLIINASDHELVSRLGFSMMRGGGGGGGGGMNCQDCGNQAKKDCSHLRCRTCCKSRGFQCQTHVKSTWVPAAKRRERQQQRHQIFQNHRRQQSQANQSDQTTLKRYGENQPLLATPTVTSGLEVAHFPAEFNSPANFRCVKVSAIDNVEEQLAYQTSVNIGGHMFKGILYDHGPETSQNMSIDIGGESSSYCHGGEDDSQPLDLVIGASNGSGRVSQSSSSAPFVESSLYPIPINNTYNNNTGTQFFPSTRA
	MELO3C010984.1	CmSRS02	MAGFFYLGGGREGPPNKQEEDEEEREQNLFLYRNDQEIYNKGFEIWPQQYNNNNNHQHQQPNPSLPNHLSFGVGPSRRSFMINDPSDEPSRSAFTLMRPAAAAFAAAAASAATAGGMNCQDCGNQAKKDCAYLRCRTCCKSRGFQCQTHVKSTWVPAAKRRERQQQIAALQHQQQQEQFRGGDNSKRLRETQTTTAVAAAPTASASACPRLPSITSGLELAQFPSEVNSPAVFRCVKVSAMDDADEEFAYQTAVNIGGHVFKGILYDQGPELRYTAAGESSSGHGGDGSTHPLNLITGPTSTTTSAATSTNPAAAAASTAPLLDPSIYPAPLNAFMAGTQFFPPSRS
	MELO3C003781.1	CmSRS03	MTELFYLDRKQEDDPENQRTRSEQQLFLYNGRSNNPQQIYSKEFQIWPQYYSHNHHLPNQNVENYISFGVGPSRRSSLMINAFDHDFVSRSGFTMTRHSGGGGGGGMNCQDCGNQAKKDCSHLRCRTCCKSRGFHCQTHVKSTWVPAAKRRERQQQRHQQLRADQSSDQTVPKIHRANQPSLTPTITSGLELGNFQGEFNSSAVFRCVKVSAIDNVEEQLAYQTAVNIGGHMFKGILYDQGPENNQINLSSGGDGENDGQGLDLVIGASNCSGRVNNQSTPFVESSLYPIPINSFNNCTQFFPSSRT
	MELO3C027042.1	CmSRS04	MAGFFPLDGGGSGGRVPNYHFPTPTTGGEIIHPTTEGLFWYKNYERLETWEGEEEHQQQQQPAQEQGGEGFVYSGDESPARSSLVMVRSGRGGGSGGGPVTSCQDCGNQAKKDCAHMRCRTCCKSRGFECETHVKSTWVPASKRRDRLLRSDGLNSKRPKDTHYHPTSSGLDMANFPMEVTTPAVFRCVRMTTLDETDDQYAYQTAVNIGGHIFKGILYDHGPEQPPPPPSSSSAAALLDSTPPYPTPLSTYITAGTQFFLPPSS
	MELO3C007877.1	CmSRS05	MSGFFTLGGGGGGREEEQNNNRPNQFIHPPPDSSLFWYKAGNVELWQQQQQHHHHHQEQPLFQTQSRTTTTTTPYSAPLTVRNSDESSSRSGNFMMISSGSGGGGISCQDCGNQAKKDCSHMRCRTCCKSRGFHCETHVKSTWVPAAKRRERQDKLAALQTHHHHQQQQLQLHGGDNNPKRHRDYNSSSLACTLIPTNNNTSGLEIGNFPAELNSPAVFRCVRVSSADDTDDQYAYQTAVNIGGHVFKGILYDQGPENNYIPPGETSSGGGGSSSGVQPLNFITGAADTTTGSGGSTAALPLLDPSSLYSTPLNSFMAGTQFFLPPRS
Quinoa (Chenopodium quinoa)	AUR62000185-RA	CqSRS01	MGMFVVAPATSFQQHESSLMLDHHHHHSHHHGGEMNGGNNAATALGVGVGVGVIPLFNAGPCLNVAGTGETGGSNNNALDGNDSFMSRNHRAGAIQLWQAQQQMGGGSPNYPKKSINFDPTGPNLLHSSSSAMGCGGGSGALTCQDCGNQAKKDCIHRRCRTCCRSRGFDCSTHVKSTWVPAARRRERQMMGVPGAAGTHGTGGGSVGGGGGASSGSTSGAKKPRLISSQNTATTSHTSTSNTPPRSFETSSSHQDASFKDSLPGQVKAPAVFKCVRVTAVDDGEDEFAYQAVVKIGGHVFKGFLYDQGVEPRDGFPNLSELHLGGAASSSAGRNGGASSSSPLLDPSDVYGASGGAGLLGGSSYGNTMN
	AUR62006536-RA	CqSRS02	MGCGGGSGALTCQDCGNQAKKDCSHRRCRTCCRSRGFDCSTHVKSTWVPAARRRERQMMGVPGAAGTHGTGGGSVGGGGGGASSGSTSGAKKPRLISSQNTATTSHTSTSNTPPRSFETSSSHQDASFKDSLPGQVKAPAVFKCVRVTAVDDGEDEFAYQAVVKIGGHVFKGFLYDQGFEPRDGFPNLSELHLGGGAAASSSAGRNGGASSSSPLLDPSDVYGASGGGGLLGGSSYGNTIN
	AUR62007206-RA	CqSRS03	MAAATSSPVLSNNGSETSVLKPNSTLADRGGASPNSTIPEQQPNEAAAPGPQSKATSLRQLSSTFSQFNNVHIPVRSRKPPTRKEALITNEWRFAKLKEYKEGNIEAENVAFNRYMQNISLLKEVFNVNSERPDENGSMVSNPPTTSGERMEIISETKVMLRSNPVRIDAFRKRIRQTIDQGLEKLQKCNSIDVPSNLDNEDDPAPKVAKNWWSEKTSPLTELNYKLDKARNEEDLKHCIKMKSKITGQQKLSSGKKTKNFEVLEEQTIQNNLPSAQESDVSLKLVRTTEIDQDALNRMDSRFSSLEEIEDL
	AUR62007636-RA	CqSRS04	MAEFFSLGTGSSAGNNNNITYRNEQIHGYQQHETKVSSEELWQHLPYSQLRIAPTEEGGDETTRSGLMMMRMTSTSSGAGNISCQDCGNQAKKDCVYMRCRTCCKSRGFDCATHVKSMEVGNFPAEVSSSAVFRCVRVSSVDETDDEYAYQTAVNIGGHVFKGILYDHGVDHSHQVNTPSPNYGAGETSSGANLAASMAPPTSISAMPTSSSSLPVGYLDPSYYPLPLNTYLGPGTPFFPNPRP
	AUR62007664-RA	CqSRS05	MAEYFSLGTGGNNNKNINYRNEQIPNNNNNYQQHENKLSTEELWQHLPCSELRIAPTEDGGDETTRSGLMMMRMSSTSGAANISCQDCGNQAKKDCVYMRCRTCCKSRGFDCATHVKTGMEVGNFPTEVNSSAVFRCVRVSSVDETDDEYAYQTAVNIGGHVFKGILYDHGVDHSHQVNTPSPNYGAAETSSGANLAASMGVPASISAMPTSSSSPPVGYLDPSYYPLPLNTYLGPGTPFFPNPRP
	AUR62010428-RA	CqSRS06	MDHYNQYLPLPLSLSNIHHHSPTSAGLEGGNFPAEVNSSATFRCIRVSSEDNVVDQYAYQTSITIGGHVFKGVLYDQGPTTARRGGEASSIATSDHHPFNITGTATSMAAGTHPNIYHPASLYSAPSFNAFLPVCSTNKIELD
	AUR62014445-RA	CqSRS07	MMRSSVGIGGEKRTRENRSNSRVLTAANTTAGLEVGNFPPEVNSPAVFRCVRVSPMDDPDEQFAYQTAVNIGGHLFKGILYDQGPETRYGGGESSSGGRSQQHSLMLTAATTTTDLMGTVGSGSTNNNTTTATATASLLDPMGTNNNSSIYPTPINAFLAGTQFFPPPRS
	AUR62016794-RA	CqSRS08	MEEIVNMEYFWQAGDDDGAKEDDEENEPTNDVIKNLDYDGMKCSRVSDLGQNHDVDLSKFGDDYHEKPDVFFEFSDGSNLNFHGYVHDAAADDRMIKSGKNSFGKMAKSKKSARVFTRPGCVRGLEGGNFPAEVNSSATFRCIRVSSEDNVVDQYAYQTSITIGGHVFKGVLNDQGPTTARRGGEASSIATSDHLPFNITGTATSMAGGANIYHPPSLYSAPSFNAFLPALPSGFLCSQIANLDTK
	AUR62018795-RA	CqSRS09	MAAATSSPVLSNNGSETSVLKPNSTLADRGGASPNSTVPEQQPNEAAAPGPQSKAASLRQLSSTFSQFNNVHIPVRSRKPPTRKEALITNEWRFAKLKEYKEGNIEAENVAFDRYMQNISLLKEVFNVNSERPDENGSMVSNPPTTSGERMEIISETKVMLRSNPVRIDAFRKRIRQTIDQGLEKLQTCNSIDVPSNLDNEDDPAPKVAKNWWSGKTSPLNELNFKLDKARNEEDLKHCIQLKSKITGQQKLSSGKKTENFEVLEDQIIHNKLPSAQEYDVSLKLVRTTEIDQDALNRMDSRFSSLEEIEDL
	AUR62034552-RA	CqSRS10	MMRPSVGIGGEKRTRENRSNSRVLTAANTTAGLEVGNFPPEVNSPAVFRCVRVSPIDDPDEQFAYQTAVNIGGHLFKGILYDQGPETRYGSGGGGGESSSGGRSQQHGLMLTAATTTTDLMGTVGSGSTNNNATTATATASLLDPMGTNNSSIYPTPINAFLA
Cucumber (Cucumis sativus)	CsaV3_1G043360.1	CsSRS1	MWPSSRPLTIGYNHTPAPTPDMVGLMASGFGVGVSVLPLLSGLAPSSVGIEEANLMISRGGGGDDGGGGIQFNGNNLDGFGILGGGSSLNSGVGTCHDCGNQAKKDCSHRRCRSCCKSRGFDCSTHVKSTWVPAARRRERQMMGAASDAAAGGTSSGSTSGGKKPRLIASQTTTNSHTSTSNTPTPSFDASSAADMSSKKAKKLPEQIRAPAVFKCVRVTAVEGGTSGGGNEYAYQAVVKIGGHVFKGYLYDHGVEARDGFPMMSNLHLGDGGSTSSPVIDPADVYGSSTTRGGGLAGGSGYGNSIN
	CsaV3_2G029220.1	CsSRS2	MINDPSDEPSRSAFTLMRPAAAAFAAAAASAATAGGMNCQDCGNQAKKDCAYLRCRTCCKSRGFQCQTHVKSTWVPAAKRRLELAQFPSEVNSPAVFRCVKVSAMDDADEEFAYQTAVNIGGHVFKGILYDQGPELRYTAAGESSSGHGGDGSTHPLNLIAGPTSTSTSAATSTNPAAASASTAPLLDPSIYPAPLNAFMAGTQFFPPSRS
	CsaV3_3G002100.1	CsSRS3	MAAPSPTLSNNSSDTATTTAGAVAANVAVSPNHLANRTGTPPKTLRGLNKPKCRVCGNVARSRCPYESCKSCCARNQNPCYIHVLKANATFPDKTPSSSSPLFDKQSPDPSSSGTSNRVASLRQLSSNFSQFNNVRLPIRSPKPLTRKDAATINEWRFSKLREFRERHIEAENEAFDRYMKNINLLEEVFSTKSMIDDRPLKDRPPVNSGTEANPEEMTPGLKLKLGSTSDNSRKRIRKIVEDGLRKIKIVETIDNVDEVTDHAQADRGEDETNPNDGCKMLEGWHAKRTRALGDLIDKLNKARNEEDLKSCLAMKHQLSDQHKTTSSEAESEETDTSKEQQVIKKDLDSRKELGFSLPKLVNKTNIDQQTLNQIDAHFSSLKQIGNL
	CsaV3_3G045570.1	CsSRS4	MTELFYLDRKQEDDPENQRARSEQQLFLYNSRSNNPQQICSKEFQIWPQYYSHHNQHPPHQNVENYISFGVGPSRRSSLMINAFDHDFVSRSGFTMTKHSGGGSGGGMNCQDCGNQAKKDCSHLRCRTCCKSRGFHCQTHVKSTWVPAAKRRERQQQRHQQSSDQTVPKIHRENPPSLTVTTTSGLEHGNFQGEFNSSAVFRCVKVSAIDNVEEQLAYQTAVNIGGHMFKGILYDQGPEYSQNLSTGGDGEDGGEGLDLVIGASNGSGRVNNQSTPFVESSLYPIPINSFNNVLFVRLKRRLEKGKKQKERERLVKFLLVWNSKLLYAV
	CsaV3_4G005360.1	CsSRS5	MAGFFPLDGGGSGGRVPNYHFPTPTTGGEIIHPTTEGLFWYKNYERLETWEGEEQQQQQQPAQEQGGEGFVYSGDESPARSSLVMVRSGRGGGGGGGPVTSCQDCGNQAKKDCVHMRCRTCCKSRGFECETHVKSTWVPASKRRDRHLRSDGLNSKRPKDTHYHPTSSGLDMGNFPTEVTTPAVFRCVRMTSLDETDDQYAYQTAVNIGGRIFKGILYDHGPEQPPPPPSSSSAALLDPTPPYPTPLSTYITAGTQFFLPPSS
	CsaV3_5G036780.1	CsSRS6	MLGLRDVLFIAPTPSSLHQQTQIISSDHHPSLPLPSSTALGVSVGIFPLLAATPCLPPSQPPPNNHTPDDVTDRTRTFDNLKRTQDFGFGKGESLIAGPGNNGSDEHVKGDAGDGSMAVCRDCGNRAKKECEYRRCRTCCKGRGNHCSTHVKSTWVPAARRRERQMLVVMDGVATASGDGGSSGSSSAGAKRPRVLIPSQSAAAAAAASTSNATTPRSFETTSSHQDASFKKSLPGHVRAPAVFRCHRVTAISSGEGELAYQATVNIGGHVFKGFLYDQGADDKNAFPSISHLHLDSGNHHRE
	CsaV3_6G039030.1	CsSRS7	MWSAAAQRSLNYGFGSEMGMVGLRDVYVVAPASSFNQNPQQHDVNLLSDPHSLAVSNPATALGVGVGVGVIPLLTAGPCLGVEEENFFGNRSNRGGGIQFQQSTQHYLKKTPSGSLDHVSGTNNELIGGGIGGSGGLASSSSATTTCQDCGNQAKKDCSHRRCRTCCRSRGFDCATHVKSTWVPAARRRERQLMAVTATAAADGSSASTSGAKKPRLIPSQTTSHTSTSNTTPPRSLDTSSSHQDAGNKEALPGQIRAQAVFKCVRVTAVDDGDDEYAYHAMVKIGGHVFKGFLYDQGVEAGDGFPNVSELHLGDGGGGGGTMNNRNGSSSSPLVDPSDVYNTAGSGSGGVPGFLGGSNYGNQIS
	CsaV3_6G046800.1	CsSRS8	MSGFFTLGGGGGGRDEEQNNNRPNQFIHPPPDSSLFWYKAGNVELWQQQQQQQHHHHHQEQPLFQTQSRTTTTTTPYSAPLAVRNSDESSSRSGNFMMISSGSGGGGISCQDCGNQAKKDCSHMRCRTCCKSRGFHCETHVKSTWVPAAKRRERQDKLAALQTHHHHHHQQQLQLHGGDNNPKRHRDYNSSSLACTLIPTNNNTSGLEIGNFPAELNSPAVFRCVRVSSADDTDDQYAYQTAVNIGGHVFKGILYDQGPENNYIPPGETSSGGGGSSSGVQPLNFIAGAADATTGSGGSTAALPLLDPSSLYSTPLNSFMAGTQFFLPPRS
	CsaV3_7G006060.1	CsSRS9	MRGLLYLGGKQEEDEEESLRSGREQQLFLYSTNNNNNNEEIYSKGLEIWPQQNVENYISFGVVGPTRKNLIINASDHEFVSRLGFSMMRGGSGGGGGMNCQDCGNQAKKDCSHLRCRTCCKSRGFQCQTHVKSTWVPAAKRRERQQQRHQIFQNHRRQQSQANQSDQTTLKRLGENQPLLATPTVTSGLQVAHFPAEFNSPANFRCVKVSAIDNVEEQLAYQTSVNVGGHMFKGILYDHGPESSQNMSIDIGGESSYCHRGEDDSQLLDLVIGASNGSGRVSQSSSSAPFVESSLYPIPINHTYNNAGTQFFPSTRT
Soybean (Glycine max)	Glyma.01G170700	GmSRS01	MAGLFSLGGGSSSRGNTQQEEIPPPDTLFWYNNKNDDVSSYHRGGGFELWNQQQLMGQGPPSQQRPLFHQDLYSALGVGPSRPISDDQSSSRSGFMLGSTGGGGGISCQDCGNQAKKDCPHMRCRTCCKSRGFDCQTHVKSTWVPASRRRERLQQFSALQQTLEPPSSGGGDLPKRHRERDHHYHSPLACTRFPSNPLSSGLEEVNFPALVRSDAEFRCVRVSSMDEEAEEEYAYSTAVNIAGHVFKGILYDYGPEGNTNYMAGAGESSSTGVGALNLTTGAIVSEPIVDPSSLYTAPLNTFIPGSGTQFFPHPRS
	Glyma.02G051900	GmSRS02	MAGLFSLGGGGGGGRGNNNNNQSSEIPPAETLFWYSSKNDDVSSFHRGFELWNQQDQHHHHHHHVMHPHARPLLQRDLYSSGVGPSRGGGGVSDDDHSSSRSAALVAMRAAAAAEGGISCQDCGNQAKKDCPHMRCRTCCKSRGYDCQTHVKSTWVPASKRRERQQALAALQQQQQEQQQQQQRDISKRPRDPTSCTRLPSSEEEGNFPSVVSSPAEFRCVRVSCVEDADDRYAYQTAVSIGGHVFKGILYDYGPENNNHNNSNNNSNNNYTAGETSASVVAAAQPLNLAAISSAALVDTSSLYSAPVNAFMAGGSGTQFFPHTRS
	Glyma.02G280000	GmSRS03	MWSTPTRSINYPEMGMFVVAPASSFHPNLHHHHHHHHQPSPNDPAVMVDSLNPATALGVGVIPLLAPTPCHESDNNILGNRTRGGGIQFWQDQQQHNQGNYTKKPQQGLLDHNSNTSSGNLVQNSGGVTASGTSSGGTTCQDCGNQAKKDCTNRRCRTCCKSRGFDCPTHVKSTWVPAARRRERQLMTSATVAPVAGSSGSTSGTKKPRLIASQTTTTSHTSTSNTTPPRSFDTSSSHQDAGFKESLPGQVRAPAVFKCVRVTAVEDGQDEYAYQAVVKIGGHEFKGFLYDQGAENRDVYPNLSELHLGGGNGGSGGAGRNGVSSSSPMMDPNDVYAASGGGLLGGSSAYGNPMN
	Glyma.04G009300	GmSRS04	MQRATQQGISSSRGSKCHDCGNQAKKECSYSRCRTCCKNKGFHCQTHIKSTWTPVDNIRRRHIPQNHNPYSGLELKFPGATNSMAIFRCVKVRSMDDAVYEIAYQTSVNIGGHVFNGLLYDQGPDQSYNNNCKGESSTSLVDQQQNNLGFVNINNGSIQSRDSSGASASATMASVGPEETLLTPSPYPFSLASFRSGQEAFMDGYEESTN
	Glyma.04G027400	GmSRS05	MAGFFSLGGTQNKEEEEVEKGDKNNLLLLRNEEIYNNKGGFEIWPQSSSSYHLSNYFAFGVGPSRRNRSEDVSLCVSEDESTRFGLSVMRTGGSSSSSMSMNCQDCGNQAKKDCAHLRCRTCCKSRGFQCQTHVKSTWVPAAKRRERHQQLAELQLQQQFRGVGDNIPKRHHPDTTTSTQLASAPQPVTGLELGQFPAEVSTSALFRCVRVSAVDASDEQYAYQTSVNIGGHVFKGFLYDQGPESSYTGAAAEGSSGGEPQQLGFITAAATTATTSGNSPFDPSLYPAPLNAFMAGTQFFQPPRS
	Glyma.04G136700	GmSRS06	MSMLGLRDLVLIAQTPSSLHHQHQGQPISENQTHTHTPNLPLPSSAASLSVGFGIFPLLTATPCVPQPHQNNEVQECGGGGANSNTTTTNYWNLKMCQEVNNPPKKGVINVADHDDEKGVMESEENGVYGPDFRVCQDCGNRAKKDCVFRRCRTCCKGRGYDCNTHVKSTWIPSVRRREREITVASGGGVGGNGGCKRPRAVVGSSQNATSHSSNSNATTPKSLATSSFHQDASFKQSLPGHVRAPAVFKCHRVSAIGNGEDEFAYLATVQISGHVFKGFLYDHGVDGKTANVVPCVSELQLGNNCSGKNRECSSAIAIGVANNNAYPASAS
	Glyma.06G009200	GmSRS07	MSLGVKDQMQRVRQGEEEVASGGSKCQDCGNQAKKECSYLRCRTCCKNKGFHCQTHIKSTWTPVDHRRRHFQGQGGDHHIPQNQNQINPYSGLELRFPAATNSMATFRCIHVRSMDDAVNEIAYQTSVNIGGHVFSGLLYDQGPEYQRGHQGESSTGFVDKQQNNNNNNLDSSGASATHQEYPFPLSSFRPGYIKPKVSG
	Glyma.06G027500	GmSRS08	MAGFFSLGGSQNKEEEEVEKGGDKNNLLLLRNEEIYNSKGGFEIWPQSSSSYHQHQNQAYQNYFAFGVGPSRRNRSEDVSLCVSDHESTRFGLTVMRSGVSSSMSMNCQDCGNQAKKDCSHLRCRTCCKSRGFQCQTHVKSTWVPAAKRRERHQQLAALQQQHQHPKRHHRDTTTTQLASAPQPIIGLELGQFPPEVSTSAVFRCVRVSAVDASDEQCAYQTSVNIGGHVFKGFLYDQGPESSYTTSAAAEGSSGGEPQPLGLITGATTATSGNNPFDPSLYPAPLNAFMAGTQFFQHPRS
	Glyma.07G230400	GmSRS09	MWPGASRSFNYNMAPHHDIFVVAPASSFHHHHDHNDAVLSDPNNGSNNSNNNPGTALGVNVFPLLTATPCLESEGIMGNISHHRNRIQLWEDHESSPPQQQQGHVERDTCGDGGLGGSGTNTCQDCGNQAKKDCSHRRCRTCCKSRGFDCATHVKSTWVPASRRRERQLMTVAAARSSGDTSGAKKPRLVASQTTSHTSTSNNTNTTPPRSFDTGSSHQDVGFKESLPCQVRAPAVFKCVRVTAVDDGGEDEYAYQAVVKIGGHVFKGFLYDQGVEDKEGYPNLSELHLGGGNGVSSSSPMVDPSHDVYAASGGGLLLGGSSNYGNHPIN
	Glyma.11G072500	GmSRS10	MAGLFSLGGSRGNTNPQEEIPPPDTLFWCNKNDDVSSYHRGSSGFELWNQQQLQHQQQQLMGHDPPPQPRPLFHQDLYSALGVGPSRPISDDQSSSRSSFLLGASGGGSAGGGISCQDCGNQAKKDCPHMRCRTCCKSRGFDCQTHVKSTWVPASRRRERLQQLSALQQHQQQQQTLEPASSAGGDLPKRHRARDHHHSPLACTRFPSNPSSSGLEEVNFPAVVRSAAEFRCVRVSSMDEEAEEEYAYSTAVNIAGHVFKGILYDYGPEGMNTNYMDAVAAAGESSSTGVGALNLTTGAIVSEPLGVDPSSLYPAPLNSFMPGSGTQFFPHPRS
	Glyma.11G113200	GmSRS11	MEAQVVKGSKCEDCGNQAKKDCEYSRCRTCCKNKAFKCQTHIRSTWIPVDRRRHQKLEHQPLTTNLKADTIPKRHKHNPYSSLEEFKFPAVMSSMALFSCVQVRSMDDTVNEIAYQTSVNIGGHVFSGLLYDQGPQQQSFNVSKGDNNSSIDPFVQQHSLNLRSSASIHTRNGASANMPPLSATASAQEPFFPPPHPFPLASFRPDMRYLSHPKP
	Glyma.11G155400	GmSRS12	MSMLGLRDLVLIAPTPSSLNHHQGQPFSENHTNTHTPNNIPLPSSAASLSVGFGIFPLLTATPCVPQSHHHHHNNEVQELGGGANSNTTTNYWNLKMCQQEVNNPPKKGVINVADHDDEKGIMENEENGVYGPNFRVCQDCGNRAKKDCIFRRCRTCCKGRGYDCNTHVKSTWIPSVRRREREITVASGGGGKRPRGIVGSSQKATVTSHSSNSNATTPRSLATSSFHQDGSLKQSLLGHVRAPAVFKCHRVSAIGNGEDEFAYLATVHISGHVFKGFLYDHGVDGKTANAVVPCVSELQVGNNCSGKNRECSSAIAIGVTNNNAYPASAT
	Glyma.12G039100	GmSRS13	MEAAQEVVVKGSKCQDCGNQAKKDCEYSRCRSCCKNKGFNCQTHIRSTWIPVDRRRHQKLEQQQPLQGDDTPKRHKHNPYSSSLEKFKFPAVMSSMASFSCVQVRSIDGTVNEIAYQATVNIGGHVFSGLLYDQGPEQSFNAKGGNIGPLDQQQNLNLWSVSIHTTRDGASATMPPLSATAAQEPFFPPPHPFPLASFRPDMTYMSHPKP
	Glyma.13G197300	GmSRS14	MNMLGLRDLVFIAPTPSQLHHHQQHQPISAEHHSNLPLPSQASLSVGLGIFPLLTVPHTNDVQVQVQDCANNNNNTNTNYWNLKMCGATEVNSTRKGVMNMEDEGSNKQMMESEEGGGEFRVCQDCGNRAKRDCSFRRCRTCCKGRGFDCSTHVKSTWVPASMRRGGGGDSSGGDGNSDAGASKRLRTLGSSKNVAASATSHSSTSNATPTKSFDTSSCQQDAGFKQSLPRHVRAPAVFRCHRVSAIGSGEDEIVYMATVHISGHVFKGFLYDHGADARNDVPSVSELQLGNNGSGKNNNRECSSAIGVPTSAYPASVC
	Glyma.14G034800	GmSRS15	MWSTQARSINYPEMGMFVVAPASSFHHHHHHQPPQHDPSVMADSLNPATALGVGVGVIPLLAATPCLESDNNILGSRTRGGGGIQLWQDQQQHHQSHYMKKQLQQGLLDHNSNTSSGNLIQNSGEVTASGTSSGGTTCQDCGNQAKKDCTNRRCRTCCKSRGFDCPTHVKSTWVPAARRRERQLMTSATAAVAGSSGSTSGTKKPRLIASQTTTTSHTSTSNTTPPRSFDTSSSHQDAGFKESLPGQVRAPAVFKCVRVTAVEDGQDEYAYQAVVKIGGHVFKGFLYDQGVENRDVYPNLSELHLGGGSGGAGRNGVSSSSPMMDPNDVYAASGGGLLGGSSAYGNPMN
	Glyma.14G216400	GmSRS16	MAGFFSLGAGRQNKAEQEEDQREENVNNAGGNNNSQFLFRNNVSEEIYNKGFEIWPQSSYHHHQNLTNFYSFGVGPSRRNNHNNSSSNNVNDDVSVSFSDESNRFGFTVMSSGGGGGGGMNCQDCGNQAKKDCQHLRCRTCCKSRGFQCQTHVKSTWVPAAKRRERQQQLSALQQQQNQHPQFRGDHSKRHRESIEGAAAGSLACVPVPITTTGLELGQFPPELNSPAVFRCVKVSAMDAPDERYAYQTAVNIGGHVFKGILYDQGMDGPYAGAGCEGSSGVGGEAQPLSLMAAATTTTAATTTSGNPFEASLYTAPMNAYMAGTHFFPPSRS
	Glyma.15G235000	GmSRS17	MNMLGLRDLFLIAPTPSQLHHHQQHQHQNQPISAEHHSNLPLPSQASLSVGLGIFPLLTVPHTNDVHAQVQDCANNNTNNTNTNYWNLKMCGPTEVNSTRKGVMNMEDEGSNKQMMESEESGGEFRVCQDCGNRAKRDCSFRRCRTCCKGRGFDCSTHVKSTWVPVSHRRGGSNSGGDHYDDDDGNASKRLRTLGSSKNVAATSHSSTSNATPTKSFDTSSCQQDAGFKQSLPRHVRAPAVFRCHRVSAIGSGEDEIAYMATVHISGHVFKGFLYDHGADTRNDVPSVSELQLGNNGSGKNTNRECSSAIGVPTSAYPASVC
	Glyma.16G132100	GmSRS18	MAGLFSLVRGGDNQEENNNQSSEIPPAETLFWYSKNDDVSSYHRGFELWNQHQEHQHHHHAMHHPHARPLLQRDLYSSGVGPSRGGISDDHSSSRSAAFVAMRAAGAEGGGISCQDCGNQAKKDCPHMRCRTCCKSRGYDCQTHVKSTWVPASKRRERQQQLMALHQQQQEQQQQRDISKRPRDSRLSSSGLEEEGHFPSVVSSPAEFRCVRVSCVEDSDDRYAYQTAVSIGGHVFKGILYDYGPENSNNNNSNNNSNNYMAGETSAVAATAQPLNLAAAASSAALIDPSSLYSAPANAFMAGSGTQFFPHTRS
	Glyma.17G150800	GmSRS19	MATPNNNNNNPNIINNNNIATAKPGTLGVGVGAVPTPPKSQRGHNKPKCKQCGNVARSRCPYECCKSCCSRNQNPCHIHVLKANSTFPDKAPSSGASPLDQQSLDPPQSTSAGRVASLRQLSNSFAQFNNLHLSLRSKKPLTRKDAAAINEWRFAKIKEYKERNVEVENEAFDRYMQNVDLLEEVLAVKSLDENVPSALESNPTTMESNEAMIPGLKLQLRSNSMRSDGLRMRIQQIVDEGLKKLKKSAVDGDINESIDDESNKASERGKGIERLSAISDLMEKINKARTEEDLKPCLEMKTQLFNLDEGASVKDLQDNEMHENETVVTDVVPAEGLDYSLPKFVTTTEIDLETLNTIDKHFSTQDIEQL
	Glyma.17G255000	GmSRS20	MAGFFSLGRQNKAEEQEEDQREDNCQFLFRNNVNEEIYNKGFEIWPQSSYHHHHQNLTNFYSFGVGPSRRNNNNSSSNNNVNDEVSVSFSDESNRFGFTVMRSGGGGVGGGGMNCQDCGNQAKKDCQHLRCRTCCKSRGFQCQTHVKSTWVPAAKRRERQQQLSALQHQQQNQQPQFRGDHSKRHRENIEGAAAGSLACVPVPITTTGLELGQFPPELNSPAVFRCVKVSAMDAPDERYAYQTAVNIGGHVFKGILYDQGTDGPYAGAGCEGSSGGGGEAQPLSLMAAATTTTAATTSGNPFEASLYTAPMNAYMAGTHFFPPPRS
	Glyma.20G037100	GmSRS21	MWPGVSRSFNYNLAPHHDIFVVAPASSFYHHHNDVVLSDPNNNNGSNNSNNPATAHGVNVFPLLTATPCLESEGIMGNISHHRNRIQLWQEHESSPPQQQQGHMERDTCGDGGGTSTCQDCGNQAKKDCSHRRCRTCCKSRGFDCSTHVKSTWVPASRRRERQLKGVAAAGAAVGSNGATSGAKKPRLVASQTTSHTSTSNNTTPPRSFDTGCSPQDVGFKESLPSQVRAPAVFKCVRVTSVDDGGEDEYAYQAVVKIGGHVFKGFLYDQGVEDKEGYPNLSELHLSGGGGGNVTSGSDGGRNGISSSSPMVDRSHDVYAASGGGLLLGGSSNYGNHPIN
Bottle gourd (Lagenaria siceraria)	Lsi01G006310.1	LsiSRS01	MSGFFTLGGGGGGREHHQDQDQQNNNRSNEIIPPPDSSLFWYKGNVELWQQQQQHHHHHHHHHHQEQALFQTQTPSRSTPYSAPLGVRSSDESSSRSGNFMMISSGSGGGGISCQDCGNQAKKDCSHMRCRTCCKSRGFHCETHVKSTWVPAAKRRERQDKLAALQTHHQHQLHLHGDNNPKRHRDYNPTSSSSLACTLIPTNNNTSGFEIGNFPPELNSPAVFRCVRVTSTDDTDDQYAYQTAVNIGGHVFKGILYDQGPENNYIPPAETSSGGGGSSSGVQMQPLNFIAAAADATTASGGSTAALPLMDPSSLYSTPLNSFMAGTQFFPPPRS
	Lsi04G000260.1	LsiSRS02	MLGLRDVLFIAPTPSSLHQQTQIISSDHHPSLPLPSSAALGVSVGIFPLLAATPCLPPPQAPPNQTADDGSERCRGLEHLKRTQDFGFGKGDSLIGGGGNNGSDEQVKGDGGDGSMAVCRDCGNRAKKECEYRRCRTCCKGRGNHCSTHVKSTWVPAARRRERQMLVVMDGVATASGDGGSSGSSSAGAKRPRVLIPSQSAAVAAASTSNATTPRSFETTSSHQDASFKKSLPGHVRAPAVFRCHRVTAISSGEGELAYQATVNIGGHVFKGFLYDQGADDKNAFPSISHLHLESGNHNRE
	Lsi04G017130.1	LsiSRS03	MTDLFYLDRKEEEDPEERGRSEQQLFLYSRSNNNQEIYSTGLQIWPQYVHPQQQQNLENYISFGVGPSKRTSFMINGSDHDFVSRSGFTMIRHGGGSAGSSGMNCQDCGNQAKKDCSHLRCRTCCKSRGFHCQTHVKSTWVPAAKRRERQQQRHPPFRTNQSDQTTPKNHREHQPSLTPTTNSGLELANFQGEFNSSAVFRCVKVSAIDNVEEQLAYQTAVNIGGHMFKGILYDQGPESSQNLSNGDDGEDGGQGLDLVIGASNGSGRVNQTTTSFVESSMYPIPINTFGTQFFPSSRT
	Lsi06G005760.1	LsiSRS04	MLTENYNFWFFFFFAGDSPAVAAARRLPSDSGAFADWVAPPSAIVADELSLGFNSTATVPPARMWPSSRPLAVGYGHTAAQAPDMVGLMASGFGVGVSVLPLLTGLAPSSVEIEEANLMISRGGDGGGGVQFNGNNLDGFGILGGGSSLNSGAGTCHDCGNQAKKDCSHRRCRSCCKSRGFDCSTHVKSTWVPAARRRERQMLGAASEAAAACGGGTSSGSTSGGKKPRLIASQTTTNSHTSTSNTPTPSFDASSAADMSCKKAKKLPEQIRAPAVFKCVRVTAVEGGSGGNEYAYQAVVKIGGHIFKGYLYDHGVEAARDGFPTLSNLHLGDGGLASSPVINPADVYGSSTARGGGMAGGSGYGNPIN
	Lsi07G002300.1	LsiSRS05	MAGFFPLGGAGSSGRGSNYHFPTTTTTITTTTGGGGGEIIHPSEGLFWYKNYERLETWEEEQHQQQQAEQGGEGFVYSGDESPARSSLVMVRSGRGGGGGHVTSCHDCGNQAKKDCVHMRCRTCCKSRGFECETHVKSTWVPASKRRDRYLRCDASNPKRPKDNPAASSGFEMGNFPVEVSSTAVFRCVRMTALDETKDQYAYQTAVNIGGHIFKGILYDHGPEQPPTSASPDAAAILITTAESAALLDPPPSYPTPLTTYIAAGTQFFIPPS
	Lsi08G013510.1	LsiSRS06	MAGFFYLGGREGPPNKQEEEEEREQNLFLYRNEEIYNKGFEIWPQQYNNNNNNHPQPNPSLTNHLSFGVGPSRRSFMINDPSDEPSRSAFTVMRPAAAAFAAASAATAGGMNCQDCGNQAKKDCAYLRCRTCCKSRGFQCQTHVKSTWVPAAKRRERQQQIAALQQQQQQQEQFRGGENSKRQRETHSAAAAAASACPRLPSITSGLELAQFPSEVNSPAVFRCVKVSAMDDADEEFAYQTAVNIGGHVFKGILYDQGPELRYTAAGESSSGHGGDGSTHPLNLIAGPTSATTSAATSTNPSSAAAAAAPLLDPSIYPAPLNAFMAGTQFFPPSRS
	Lsi10G010870.1	LsiSRS07	MWSAAAQRSLNYGLGSEMGMVGLRDVYVVAPASSFNQNPHQHDANLMSDPHSLAVSNPATALGVGVGVGVIPLLTAGPCLGVEEDNLLGNRSSSRGGGIQLWQQNQQSTQHYLKKTAVSSLDHHLHNSSGTNNDLIGGGIGVSGGLASSSSATTTCQDCGNQAKKDCSHRRCRTCCRSRGFDCATHVKSTWVPAARRRERQLMAVTATAAAGSSGSTSGAKKPRLIASQTTSHTSTSNTTPPRSLDTSSSHQDAGFKEALPGQVRAPAVFKCVRVTALDDGDAEYAYQAVVKIGGHVFKGFLYDQGVEAGDAFPNVSELHLGDGGGGSRNNRNGSSSSSPLVDPSDVYNAAASGGGGVPGFLGGSNYGNQIS
Sweet clover (Melilotus albus)	Malbus0105973.1	MaSRS01	MAGLFSLGGGGGGGRGNQQEQSQQQSQIPPQETLFWYSKNEDISSYRGNLELWNQHQHQQQQQQQQQQEDMHGARPFFPRDLYGPGVGLGVGPSRVSSDDHEHQSSSRSGAAAFTMAMRSSSSAEGISCQDCGNQAKKDCPHMRCRTCCKSRGFQCQTHVKSTWVPASRRRERQQQLSSSLPLQRDISKRPRDGSNALVSTRNFNSGLEEANFPAVVSSPAEFRCVRVSSIDDADDRYAYQTAVNIGGHLFKGILYDFGPESSINNNNNNDYNNSNYMIGETSGGGGVGVAQPLNLIADSDTTVVASSGTLVDPSSLYSAPINAFMTASGTQFFPRPRS
	Malbus0200518.1	MaSRS02	MSELFSLGRKEYQKEGNINSNEEIYNKGLEIIWPQQSLNSYNAFGVDHSSIRNSECRIGSLIMRRSGGVNCQDCGNQAKKDCVHLRCRTCCKSRGFQCQTHVKSTWVPAAKRRERQQHLSALPFRRRHTDINQGATSLPFPQPPIPTTGLELGQFPPEVSSPGVTFRCVRVSSLDGPDHEQCAYQTAVNIGGHVFKGILYDQGPPSSHYSASAPIHEGSSGGGGHQPQQLDFLTASAATTATTTGIHFDPSLYSAPLNAFMASTQFFHSQHPS
	Malbus0205193.1	MaSRS03	MAGLFSLGSSGGRNEVEENQHNNPTTEFWFTNKNDESVVSAYRGFEIWNQQQQHQFLSLQQQQQDLYSSGVVLGVGPSRVSNCSDENRSAAGFVAATASGSGGGISCQDCGNQAKKDCPHMRCRTCCKSRGFDCQTHVKSTWVPASRRRERQQQQQHQQHVAVTKQHGDGDLNNNQQITSNSTLACTRLPTNPSLTIPSAGFLEEVNFPAVVNSPAEFRCVKVSSVDEPEEEYAYSTAVNIGGHIFRGILYDYGPDHGNNSYNMAAGNTSSSGGEAAVQPLNLISAVPATAVGEIVDPSSLYPAPINSFMPSSGTQFFPHPRS
	Malbus0501767.1	MaSRS04	MAGFFSLSSGRGKEEAREQEENNNNSGNSNQFLFRNEEIYNKGFEIWPQQSSFHHHHHQQHQQNINNFYSFGVGSSSRRNVDENNNDNVSVSFSDESTRFGLTVMRSSSGGLGGGGGGMNCQDCGNQAKKDCPHLRCRTCCKSRGFQCQTHVKSTWVPAAKRRERQQQLTSLQQHNQQQQFHSSRRHRENETDPSTAATGSLTCTPVPITTTGLELGNFPPELNSPAVFRCVKVSAMDAQDERYAYQTAVNIGGRVFKGILYDQGLEGNYTSPTAAGGGGGGGGGGSSGGGGGSGGDGNQQNLITTTTNVSNPFEYSSLYPAPLNAFMAGTQFFPPPRS
	Malbus0503375.1	MaSRS05	MSMLGLRDLVLIAPSPSLQHHHHQQQQNQNQPISHDHNSNHPLPSSASLSVGFGIFPLLTATPCMPQQQQQQPQNNEVQENPNNNNFWNLRMCPEVVNLPKKGVINVDDENHNNNSKMVLMENEENGVYGSEYRVCQDCGNRAKKDCVFRRCRTCCKGRGYDCSTHLKSTWIPSTRRREREVEMFAAGGGDGEGCSGVKRPKTLLGSSQNATATSHSSNSNGTTPKSFATSSCHQDAGFKEGLPGHVHAPAVFRCHRVTAIGNGEDEFAYLATVHISGHVFKGFLYDHGVDGKNPMPCLSELQLGNNCSGKNGECSSAIGVPNNNAYPASGS
	Malbus0503792.1	MaSRS06	MGMFVVAPSSFHHHNNHHEALMSDPHSLNNPATALGVGVIPLLTSSPCLENENMLNNRRNQQGIQFWHEQHHQQQQQQQQQTTHSHYLKKQGFLDHHNTSPTNLIHGGCGGGGGLTGSGTSSGGGTTTCQDCGNQAKKDCSNRRCRTCCKSRGFDCPTHVKSTWVPAARRRERLATTATTTVVAGGGSSGSTSGAKKPRLIASQTTSHTSTSNTTPPRSFDTTSSHQDAGFKESMPGQVRAPAVFKCVRVTSVDDGKDEYAYQAVVKIGGHVFKGFLYDHGVENREVYPNLSELHLGGGNGNVGGANRNGVSSSSPMLDPSHDVYAAASSGGGGLLGGSAYAAGFYHMILANG
	Malbus0601083.1	MaSRS07	MNMLGLRDLVLIAQTPSSLHNQQNQPISSDHNPNIPLPSSSALSVGLGIFPLLTTTHPHHQNHNNNNNDSIQDSNFWNLKMCQPQQVMLMNSTRKRVEEEEEEEEENDVKNKNMMMRCEENGEFRVCQDCGNRAKKDCSYKRCRTCCKGRGFDCSTHVKSTWIPASMRRDRNVVVAEGGVSSGTKRQRILVSSSHNNAAANSHSSSSNAATTRSLSLDITSSCHQDPGFKQSLPRYVRAPAVFKCHRVSAIGNGEDELAYLATVNISGHVFKGFLYDQGVDGKNETMPCVSELQLGSNGSGKSNRECSSSAIDVPTSAYPASAC
	Malbus0702600.1	MaSRS08	MYATQLREEEVLKGSKCEDCGNQAKKDCAYTRCRNCCKNKKFNCQTHIRSTWIPADRRRHRMDHPSNQHHLHEHKRHKQINTISSSDDEFKFPAVTSSMARLTRVQVRSMDQTVNETAYQTSVEIGGHVFSGILYDQGPDQQSFNNIDPLDQQQNLNLFSSNSIHTGDDGAAATGSHRRLLFPPPHPLPSFRPGMPY
	Malbus0800677.1	MaSRS09	MATAPSNNSTAKVGTLGLTNSPVASSAPKSQRGQNKPKCKQCGNVARSRCPYEQCKSCCSKNQNPCPIHVLKASTIPDNTPSSGAAPLDRKSFEPPPSVSAGRVASLRQLSNSFAQFNNLHLSLRSKKPLTRKDAAAINEWRFSKLKEYKERNIEVENEAFDRYMQNVDLLEEVLSVKHSDENVSPASEANPTPTENDEVMINSNNEVMNPGLKLQLRSNSTRSDGVRVRIRKIVDEGLKKLKKCAEDGDSNNEQIDEVSESSNKRKRTEKLSAISDLMDKINKARSEEDLQSCLEVKLQLFNSDEDSAMVQLTDNEMHQNQTAEGDVVPAKELDYSLPKLVGSSEIDQETLNTIDKHFASLEYVEQL
Alfalfa (Medicago sativa)	MS.gene69441.t1	MsSRS01	MAGLFCLGRKEDQKEDKLDYYSNKELLLRNEEIYNNKGLEIWPQQSLNIYNAFGAGHSSSSRNSSFDECERRFGIMRRSGGMNCQDCGNQAKKDCIHLRCRTCCKSRGFQCQTHVKSTWVPAAKRRERQQHLSALPFRRRDHGDNYKRHTEINQGLELGQFPPEVSSPGVTFRCVRVSSLDGPDHEQCAYQTAVNIGGHVFKGILYDQGPPNLYTSIAPIEGSSGGGHHQPQQLDFMTATATTATTSSIPFDPSLYSAPLNAFMAAGTQFFHPQHPN
	MS.gene76456.t1	MsSRS02	MAGLFSLGGGGRGNQGEESQQQGHIPPQETLFWYNKNDDVSSYNRGNLELWNQHQQQQHQQHHQQQQQQDDMHAARPFFPRDLYGPGVGLGVGPSRVSSDDHEHQSSSRSAAFTMAMRSSSSAEGISCQDCGNQAKKDCPHMRCRTCCKSRGFQCQTHVKSTWVPASRRRERQQQLSSSPLQRDISKRPRDGSNALVSTRNFPSGLEEANFPAVVSSPAEFRCVRVSSIDDADDRYAYQTAVNIGGHLFKGILYDFGPESSTNNNSNNSNYNNSNYMIGETSGEGGVGVAQPLNLITDSDTTVVASSGALVDPSSLYSAPINAFMTASGTQFFPRPRS
	MS.gene89624.t1	MsSRS03	MAGLFSLGGGGRGNQGEESQQQGHIPPQETLFWYNKNDDVSSYNRGNLELWNQHQQQQHQQHHHQQQQQQDDMHAARPFFPRDLYGPGVGLGVGPSRVSSDDHEHQSSSRSAAFTMAMRSSTSAEGISCQDCGNQAKKDCPHMRCRTCCKSRGFQCQTHVKSTWVPASRRRERQQQLSSSPLQRDISKRPRDGSNALVSTRNFQTGLEEANFPAVVSSPAEFRCVRVSSIDDADDRYAYQTAVNIGGHLFKGILYDFGPESSTNNNSNNSNYNNSNYMIGETSGGGGVGAAQPLNLITDSDTTVVTSSGALVDPSSLYSAPINAFMTASGTQFFPRPRS
	MS.gene012066.t1	MsSRS04	MAGLFSLGGGGRGNQGEESQQQGHIPPQETLFWYNKNDDVSSYNRGNLELWNQHQQQQHQQHHQQQQQQQDDMHAARPFFPRDLYGPGVGLGVGPSRVSSDDHEHQSSSRSAAFTMAMRSSSSAEGISCQDCGNQAKKDCPHMRCRTCCKSRGFQCQTHVKSTWVPASRRRERQQQLSSSPLQRDISKRPRDGSNALVSTRNFQTGLEEANFPAVVSSPAEFRCVRVSSIDDADDRYAYQTAVNIGGHLFKGILYDFGPESSTNNNSNNSNYNNSNYMIGETSSGGGVGVAQPLNLITDSDTTVVASSGALVDPSSLYSAPINAFMTASGTQFFPRPRS
	MS.gene42294.t1	MsSRS05	MRRSGGMNCQDCGNQAKKDCIHLRCRTCCKSRGFQCHTHVKSTWVPAAKRRERQQHLSALPFRRRDHGDNYKRHTEINQGATSLPCPQPPIPTTGLELGQFPPEVSSPGVTFRCVRVSSLDGPDHVQCAYQTAVNIGGHVFKGILYDQGPPNLYTSIAPIEGSSGGGHHQPQQLDFMTATATTATTSGIPFDPSLYSAPLNAFMAAGTQFFHPQHPN
	MS.gene010569.t1	MsSRS06	MAGLFSLGRTEEENQQNNNPTTEFWYNKNDDSVVSNSYRGFEIWNQHQQHLFSLQQPQQQQQQQQQDLYSSGVVLGVGPTRVCSSDENRSTVFVGSGSGGISCQDCGNQAKKDCPHMRCRTCCKSRGFDCQTHVKSTWVPAARRRERQQQQLSAPKSSQQHGERDLNNNNSSLACTRLPTNPSLTLPSAGLLEEMNFPAVVNSPAEFRCVRVSSVDENEEEYAYSTAVNIGGHVFRGILYDYGPDHGNNSYNMATGNASNSSGTLLEGVAQPLNLISSVPDATAVGEIVDPSSLYPAPLNSFMPSSGTQFFPHPRS
	MS.gene90735.t1	MsSRS07	MRSSSGGLGGGGMNCQDCGNQAKKDCPHLRCRTCCKSRGFQCQTHVKSTWVPAAKRRERQQQLTSLQQQNQQQQQQFHSRRHRENQNDPSGASGSLTCTPVPITTTGLELGNFPPELNSPAVFRCVKVSAMDAQDERYAYQTAVNIGGRVFKGILYDQGLEGSYTSPNAAAGGGEGSSGGGSGGEGNQQNLITTTTTNVNNPFEYSSLYPAPLNAFMAGTQFFPPPRS
	MS.gene24222.t1	MsSRS08	MRSSSGGLGGGGMNCQDCGNQAKKDCPHLRCRTCCKSRGFQCQTHVKSTWVPAAKRRERQQQLTSLQQQNQQQQQQFHSRRHRENQNDPSGASGSLTCTPVPITTTGLELGNFPPELNSPAVFRCVKVSAMDAQDERYAYQTAVNIGGRVFKGILYDQGLEGSYTSPNAAAGGGEGSSGGGSGGEGNQQNLITTTTTNVNNPFEYSSLYPAPLNAFMAGTQFFPPPRS
	MS.gene27013.t1	MsSRS09	MRSSSGGLGGGGMNCQDCGNQAKKDCPHLRCRTCCKSRGFQCQTHVKSTWVPAAKRRERQQQLTSLQQQNQQQQQQFHSSRRHRENQNDPSGASGSLTCTPVPITTTGLELGNFPPELNSPAVFRCVKVSAMDAQDERYAYQTAVNIGGRVFKGILYDQGLEGSYTSPNAAAGGGEGSSGGGSGGEGNQQNLITTTTTNVNNPFEYSSLYPAPLNAFMAGTQFFPPPRS
	MS.gene27276.t1	MsSRS10	MRSSSGGLGGGGMNCQDCGNQAKKDCPHLRCRTCCKSRGFQCQTHVKSTWVPAAKRRERQQQLTSLQQQNQQQQQQFHSSRRHRENQNDPSGASGSLTCTPVPITTTGLELGNFPPELNSPAVFRCVKVSAMDAQDERYAYQTAVNIGGRVFKGILYDQGLEGSYTSPNAAAGGGEGSSGGGSGGEGNQQNLITTTTTNVNNPFEYSSLYPAPLNAFMAGTQFFPPPRS
	MS.gene02408.t1	MsSRS11	MAGLFSLGRTEEENQQNNNNPTTEFWYNKNDDSVVSNSYRGFEIWNQHQHQQHLFSLQQPQQQQQQQDLYSSGVVLGVGPTRVCSSDENRSTVFVGSGSGSGGISCQDCGNQAKKDCPHMRCRTCCKSRGFDCQTHVKSTWVPAARRRERQQQQLSAPKSSQQHGERDLNNNNSSLACTRLPTNPSLTLPSAGLLEEMNFPAVVNSPAEFRCVRVSSVDENEEEYAYSTAVNIGGHVFRGILYDYGPDHGNNSYNMATGNASNSSGTLLEGVAQPLNLISSVPDATAVGEIVDPSSLYPAPLNSFMPSSGTQFFPHPRS
	MS.gene64712.t1	MsSRS12	MAGLFSLGRTEEENQQNNNNPTTEFWYNKNDDSVVSNSYRGFEIWNQHQHQQHLFSLQQPQQQQQQQDLYSSGVVLGVGPTRVCSSDENRSTVFVGSGSGSGGISCQDCGNQAKKDCPHMRCRTCCKSRGFDCQTHVKSTWVPAARRRERQQQQLSAPKSSQQHGERDLNNNNSSLACTRLPTNPSLTLPSAGLLEEMNFPAVVNSPAEFRCVRVSSVDENEEEYAYSTAVNIGGHVFRGILYDYGPDHGNNSYNMATGNASNSSGTLLEGVAQPLNLISSVPDATAVGEIVDPSSLYPAPLNSFMPSSGTQFFPHPRS
	MS.gene59419.t1	MsSRS13	MAGLFSLGRTEEENQQNNNNPTTEFWYNKNDDSVVSNSYRGFEIWNQHQHQQHLFSLQQPQQQQQQQDLYSSGVVLGVGPTRVCSSDENRSTVFVGSGSGSGGISCQDCGNQAKKDCPHMRCRTCCKSRGFDCQTHVKSTWVPAARRRERQQQQLSAPKSSQQQHGERDLNNNNSSLACTRLPTNPSLTLPSAGLLEEMNFPAVVNSPAEFRCVRVSSVDENEEEYAYSTAVNIGGHVFRGILYDYGPDHGNNSYNMATGNASNSSGTLLEGVAQPLNLISSVPDATAVGEIVDPSSLYPAPLNSFMPSSGTQFFPHPRS
	MS.gene038203.t1	MsSRS14	MVGNNNRKIEIEKVVIEFSHSFTAIAHFEKAKLTVVVVATITAPTATAAEAETTRKSSENNNSRTIRLTFVATTRRLPSDSGAFADWAATNSSTTLRAAAPEDLSLGFNAGPTAGNAGASTGPTTGLYNSSRSINYGPEMGMFVVAPSSFHHHHHNNHEAALMSDPHSLNPATALGVGVIPLLTASPCLENENMLNNRRNQQGIQFWHEQHHHHHQQQQQQQQSPHSHYLKKQQGFLDHHSTSPTNLVHGTGGLTGSGTSSGGGTTTCQDCGNQAKKDCSNRRCRTCCKSRGFDCPTHVKSTWVPAARRRERLSSTATTTVVAGGGSSGSTSGAKKPRLIASQTTSHTSTSNTTPPRSFDTTSSHQDAGFKDSMPGQVRAPAVFKCVRVTSVDDGKDEY…
	MS.gene016988.t1	MsSRS15	MRVPPPETPELPPDPPPDYIIHLALMSDPHSLNPATALGVGVIPLLTASPCLENENMLNNRRNQQGIQFWHEQHHHHQQQQQQQQQSPHSHYLKKQQGFLDHHNTSPTNLVHGTGGLTGSGTSSGGGTTTCQDCGNQAKKDCSNRRCRTCCKSRGFDCPTHVKSTWVPAARRRERLSSTATTTVVAGGGSSGSTSGAKKPRLIASQTTSHTSTSNTTPPRSFDTTSSHQDAGFKDSMPGQVRAPALFKCVRVTSVDDGKDEYAYQAVVKIGGHVFKGFLYDHGVENREVYPNLSELHLGGGGNNNGGANRNGVSSSSPMMDPSHDVYAAASSGGGGLLGGSAYGNQIN
	MS.gene47711.t1	MsSRS16	MNERNKKMMREENVVATTRRLPSDSGAFADWAATNSSTTLRAAAPEDLSLGFNAGPTAGNAGASTGPTTGLYNSSRSINYGPEMGMFVVAPSSFHHHHHHHNNHEAALMSDPHSLNPATALGVGVIPLLTASPCLENENMLNNRRNQQGIQFWHEQHHHHQQHQQQQQSPHSHYLKKQQGFLDHHNTSPTNLVHGTGGLTGSGTSSGGGTTTCQDCGNQAKKDCSNRRCRTCCKSRGFDCPTHVKSTWVPAARRRERLSSTATTTVVAGGGSSGSTSGAKKPRLIASQTTSHTSTSNTTPPRSFDTTSSHQDAGFKDSMPGQVRAPALFKCVRVTSVDDGKDEYAYQAVVKIGGHVFKGFLYDHGVENREVYPNLSELHLGGGGGGNNNGGANRNGVSS…
	MS.gene038141.t1	MsSRS17	MNERNKKMMREENVVATTRRLPSDSGAFADWAATNSSTTLRAAAPEDLSLGFNAGPTAGNAGASTGPTTGLYNSSRSINYGPEMGMFVVAPSSFHHHHHHHNNHEAALMSDPHSLNPATALGVGVIPLLTASPCLENENMLNNRRNQQGIQFWHEQHHHHQQHQQQQQSPHSHYLKKQQGFLDHHNTSPTNLVHGTGGLTGSGTSSGGGTTTCQDCGNQAKKDCSNRRCRTCCKSRGFDCPTHVKSTWVPAARRRERLSSTATTTVVAGGGSSGSTSGAKKPRLIASQTTSHTSTSNTTPPRSFDTTSSHQDAGFKDSMPGQVRAPALFKCVRVTSVDDGKDEYAYQAVVKIGGHVFKGFLYDHGVENREVYPNLSELHLGGGGGGNNNGGANRNGVSS…
	MS.gene039655.t1	MsSRS18	MCPEVVNLPKKGVITEEENHGKMAMMESEENGVYGSEYRVCQDCGNRAKKDCVFRRCRTCCKGRGYDCSTHLKSTWIPSTRRREREVEMFAGGGGGGGGGDGEGCSGVKRQKGLLGSSQNAAATSHSSNSNDAGFKEGLPGHVHAPAVFRCHRVTAIGNGEDEFAYLATVHISGHVFKGFLYDHGVDGKNPMPCVSELQLGNNCSGKNGECSSAIGVPNNNAYPASAS
	MS.gene88496.t1	MsSRS19	MNMLGLRDLVLIAQTPSSLHNQQNQTISSDHNPNIPLPSSSALSVGLGIFPLLTTTHPHHQNPNNNNYNENIHQDSSFWNLKMCQPQQVMMMNSSRKRVEEEEQEDDVRNKNLMMMGCEENGEFRVCQDCGNRAKKDCSYKRCRTCCKGRGFDCSTHVKSTWIPASMRRDRSMMVAEGGDSDGGASSGTKRQRILISSSQNNAAANSHSSSSNAATRTRSLSLDITSSCHQDPGFKQTLPRYVRAPAVFKCHRVSAIGNGEDELAYLATVNISGHVFKGFLYDQGVDDKNETMPCVSELQLGSNGSGKSNRECSSSAIEVQTNAYPASAC
	MS.gene60121.t1	MsSRS20	MNMLGLRDLVLIAQTPSSLHNQQNQTISSDHNPNIPLPSSSALSVGLGIFPLLTTTHPHHQNPNNNNENIHQDSNFWNLKMCQPQQVMMMNSSRKRVEEEEDDVRNKNLMMGCEENGEFRVCQDCGNRAKKDCSYKRCRTCCKGRGFDCSTHVKSTWIPASMRRDRSMMVAEGGDSDGGASSGTKRQRILISSSQNNAAANSHSSSSNAATRTRSLSLDITSSCHQDPGFKQTLPRYVRAPAVFKCHRVSAIGNGEDELAYLATVNISGHVFKGFLYDQGVDDKNETMPCVSELQLGSNGSGKSNRECSSSAIEVQTNAYPASAC
	MS.gene056231.t1	MsSRS21	MNMLGLRDLVLIAQTPSSLHNQQNQTISSDHNPNIPLPSSSALSVGLGIFPLLTTTHPHHQNPNNNNENIHQDSSFWNLKMCQPQQVMMMNSARKRVEEEEDDVRNKNLMMGCEENGEFRVCQDCGNRAKKDCSYKRCRTCCKGRGFDCSTHVKSTWIPASMRRDRSMMVAEGGDSDGGASSGTKRQRILISSSQNNAGANSHSSSSNAATRTRSLSLDITSSCHQDPGFKQTLPRYVRAPAVFKCHRVSAVGNGEDELAYLATVNISGHVFKGFLYDQGVDDKNETMPCVSELQLGSNGSGKSNRECSSSAIEVPTSAYPASAC
	MS.gene016607.t1	MsSRS22	MNMLGLRDLVLIAQTPSSLHNQQNQTISSDHNPNLPLPSSSALSVGLGIFPLLTTTHPHHQNPNNNNENIHQDSSFWNLKMCQPQQVMMMNSSRKRVEEEEDDVRNKNLMMGCEENGEFRVCQDCGNRAKKDCSYKRCRTCCKGRGFDCSTHVKSTWIPASMRRDRSMMVAEGGDSDGGASSGTKRQRILISSSQNNAAANSHSSSSNAATRTRSLSLDITSSCHQDPGFKQTLPRYVRAPAVFKCHRVSAVGNGEDELAYLATVNISGHVFKGFLYDQGVDDKNETMPCVSELQLGSNGSGKSNRECSSSAIEVPTSAYPASAC
	MS.gene062884.t1	MsSRS23	MADAGFKEGLPGHVHAPAVFRCHRVTAIGNGEDEFAYLATVHISGHVFKGFLYDHGVDGKNPMPCVSELQLGNNCSGKNGECSSAIGVPNNNAYPASAS
	MS.gene046193.t1	MsSRS24	MCPEVVNLPKKGVITEEENHGKMAMMENEENGVYGSEYRVCQDCGNRAKKDCVFRRCRTCCKGRGYDCSTHLKSTWIPSTRRREREVEMFAGGGGGGDGEGCSGVKRQKGLLGSSQNAAATSHSSNSNGTTPKSFATSSCHQDAGFKEGLPGHVHAPAVFRCHRVTAIGNGEDEFAYLATVHISGHVFKGFLYDHGVDGKNPMPCVSELQLGNNCSGKNGECSSAIGVPNNNAYPASAS
	MS.gene98751.t1	MsSRS25	MYSTQLGKEEVLKGLKCQDCGNQAKKDCAYSRCRSCCKNKGFHCQTHIRSTWIPADRRRHRMDHPSDQHHLHEHKRHKQINTISSSDEFKFPAVTSSMATLTCVQVRSMDGTVNETAYQTSVEIGGHVFSGILYDQGPDQQSFHTIHSLDQQQNLNLFSSNAIHTGDDGASASATIGATASHRRFLFPPPHPLPSFRP
	MS.gene016606.t1	MsSRS26	MWTPNPGFKQTLPRYVRAPAVFKCHRVSAIGNGEDELAYLATVNISGHVFKGFLYDQGVDDKNETMPCVSELQLGSNGSGKSNRECSSSAIEVPTSAYPASAC
	MS.gene65734.t1	MsSRS27	MPQQQQQPQNNEVQENPSNNNNFWNLRMCPEVVNLPKKGVITEEENHGKMAMMESEENGVYGSEYRVCQDCDAGFKEGLPGHVHAPAVFRCHRVTAIGNGEDEFAYLATVHISGHVFKGFLYDHGVDGKNPMPCVSELQLGNNCSGKNGECSSAIGVPNNNVYPASAS
Tobacco (Nicotiana sylvestris)	>XP_009763993.1	NsSRS01	MAGFFSLGGGAASSSQAQDQQHQQSTNNPPTEISPESWFLYRNDQELPTYRGFELWQTSNSQPQIRHPINPLQDLYPTAAVGLGVGPSRSGFTMTAARPDHDPSSGGSGGLVMMRSGGGGISCHDCGNQAKKDCEHMRCRTCCKSRGFQCQTHVKSTWVPAAKRRERQQLTTLQQQQEEQQQQQTQQLHIDNNPKRQREDPSSSSLVCTRILPSSTSGLEVGNFPAKVSSTAVFHCVRMSSADDAEDQFAYQTAVNIGGHVFKGILYDQGPENQYMAAGESSSAGGSASHHHNLIGAAGTATSAATTSASGGGAAAAPEASPYLDPSLYPAPINTFMAGTQFFPPPRS
	>XP_009778393.1	NsSRS02	MAGFFSLGGGRETSQEQHHQETTNHHNPENNWFLYRNHDQELPVYKGFELWQQQDEQQNYQIRNPIINPLQDLYPTSAIGLGVGPTATDHGASRSAAFVMMRSSSGGGISCQDCGNQAKKDCQHMRCRTCCKSRGLQCQTHVRSTWVPAAKRREKQQQIASLQQQEHRDNNNPKRQKDDPSGSSLVCTRLPSNTAGLEVGNFPSKVNSTAVFHRVRMSSIEETEDQIAYQTAVNIGGHIFKGILYDQGLESQYNMNATTGDSSSGGTEPVVPHQHNLIGATTSAATSNAVASGGGSTAAAEGSHFLEHSIYSAPLINTFMAAGTQFFPPPARS
	>XP_009784124.1	NsSRS03	MMMMMREDGISSNSRCQDCGNQAKKDCPYLRCRTCCKSRGFQCQTHVKSTWIPVSRRRPRHHLLHTIQQQQQQQKQLQANPKRYRENDNNLAAGGKEEDLPTELSLPAVFRCVRVSSVDNVVDQYAYQTSVKIAGHVFKGILYDQGPETETHYTNMARESSSNGFQQEQLTTNLTQPLPSYPSPFNNFMPAPPLVMSSSRGNSLLQECMVRLYIYNKSSCPKPHAQREFRAPDCLFANKKPWCRSLQHLGKSWQRHEKGNL
	>XP_009784126.1	NsSRS04	MMMMMREDGISSNSRCQDCGNQAKKDCPYLRCRTCCKSRGFQCQTHVKSTWIPVSRRRPRHHLLHTIQQQQQQQKQLQANPKRYRENDNNLAAGGKEEDLPTELSLPAVFRCVRVSSVDNVVDQYAYQTSVKIAGHVFKGILYDQGPETETHYTNMARESSSNGFQQEQLTTNLTQPLPSYPSPFNNFMPAPPLVMSSSRGNSLLQECMVRLYIYNKSSCPKPHAQREFRAPDCLFANKKPWCRSLQHLGKSWQRHEKGNL
	>XP_009784127.1	NsSRS05	MMMMMREDGISSNSRCQDCGNQAKKDCPYLRCRTCCKSRGFQCQTHVKSTWIPVSRRRPRHHLLHTIQQQQQQQKQLQANPKRYRENDNNLAAGGKEEDLPTELSLPAVFRCVRVSSVDNVVDQYAYQTSVKIAGHVFKGILYDQGPETETHYTNMARESSSNGFQQEQLTTNLTQPLPSYPSPFNNFMPAPPLVMSSSRGNSLLQECMIIAALG
	>XP_009784128.1	NsSRS06	MMMMMREDGISSNSRCQDCGNQAKKDCPYLRCRTCCKSRGFQCQTHVKSTWIPVSRRRPRHHLLHTIQQQQQQQKQLQANPKRYRENDNNLAAGGKEEDLPTELSLPAVFRCVRVSSVDNVVDQYAYQTSVKIAGHVFKGILYDQGPETETHYTNMARESSSNGFQQEQLTTNLTQPLPSYPSPFNNFMPGINIFCQIPKNHLL
	>XP_009784129.1	NsSRS07	MRLLVTNNNSNKSSKIPQVGSGEGGKEEDLPTELSLPAVFRCVRVSSVDNVVDQYAYQTSVKIAGHVFKGILYDQGPETETHYTNMARESSSNGFQQEQLTTNLTQPLPSYPSPFNNFMPAPPLVMSSSRGNSLLQECMVRLYIYNKSSCPKPHAQREFRAPDCLFANKKPWCRSLQHLGKSWQRHEKGNL
	>XP_009785993.1	NsSRS08	MMKEVEGSSSSSRCQDCGNQAKKDCTYLRCRTCCRSRGFHCQTHIKSTWAPVSTRRPRHHLHQQLSTIQQQLQAVPNPNKRYRENHEIQGEEEGDFPGEVSFPAVFRCIRVSSIDNVVDQYAYQTSVQIGGHVFKGILYDQGSENRYNNMAAGESSSFQQQQPPILLTAATTSTTAAPSYPNPFSTFIPEIQDKAAYNRSLWFGPLISRILRIVKA
	>XP_009785995.1	NsSRS09	MMKEVEGSSSSSRCQDCGNQAKKDCTYLRCRTCCRSRGFHCQTHIKSTWAPVSTRRPRHHLHQQLSTIQQQLQAVPNPNKRYRENHEIQGEEEGDFPGEVSFPAVFRCIRVSSIDNVVDQYAYQTSVQIGGHVFKGILYDQGSENRYNNMAAGESSSFQQQQPPILLTAATTSTTAAPSYPNPFSTFIPGYHHMGANKTNQYLYGVHASFKFYG
	>XP_009785996.1	NsSRS10	MMKEVEGSSSSSRCQDCGNQAKKDCTYLRCRTCCRSRGFHCQTHIKSTWAPVSTRRPRHHLHQQLSTIQQQLQAVPNPNKRYRENHEIQGEEEGDFPGEVSFPAVFRCIRLVKAAPFSSSNLLFYLLLQPLVLLQHLLIPILLVLSFLATTTWAQIKRISTCTEFMHLSSFMDKR
	>XP_009785997.1	NsSRS11	MMKEVEGSSSSSRCQDCGNQAKKDCTYLRCRTCCRSRGFHCQTHIKSTWAPVSTRRPRHHLHQQLSTIQQQLQAVPNPNKRYRENHEIQGEEEGDFPGEVSFPAVFRCIRLVKAAPFSSSNLLFYLLLQPLVLLQHLLIPILLVLSFLKYRIRLHIIDRYGSVR
	>XP_009786844.1	NsSRS12	MAAAASSPALSNHSADSAPSPASATAAPTVTPAVVSSHPTINASKNLRGLNKPKCIKCGNVARSRCPFQSCKSCCAKAQNPCHIHVLKGGSTLPDKLPSSGSPVVDQQSTEASHSGSSHRGAASLRQLSTNFAQFNNLQTPLRSRKPLTRKDAQLINEWRFMKLKEFRDSNIAAENEAFDRYMQNVGLLEEVFAVNSAEDEKNEDGSTGDDNEATVNRLKLQLRSDPTRIENTRKRMQYIVDQGLRKLRKLESGDNATDLSDLDALGKKKKTKSADAEWGVSFTDLIDKLNKARNEEDLKACWEMKFQLFNQNKKEKQAGSDNAEASIELSSKASVMPTMPSGNSPPKWFSTSTIDDEELLRLNAQFDSLEDIEEL
	>XP_009786845.1	NsSRS13	MAAAASSPALSNHSADSAPSPASATAAPTVTPAVVSSHPTINASKNLRGLNKPKCIKCGNVARSRCPFQSCKSCCAKAQNPCHIHVLKGGSTLPDKLPSSGSPVVDQQSTEASHSGSHRGAASLRQLSTNFAQFNNLQTPLRSRKPLTRKDAQLINEWRFMKLKEFRDSNIAAENEAFDRYMQNVGLLEEVFAVNSAEDEKNEDGSTGDDNEATVNRLKLQLRSDPTRIENTRKRMQYIVDQGLRKLRKLESGDNATDLSDLDALGKKKKTKSADAEWGVSFTDLIDKLNKARNEEDLKACWEMKFQLFNQNKKEKQAGSDNAEASIELSSKASVMPTMPSGNSPPKWFSTSTIDDEELLRLNAQFDSLEDIEEL
	>XP_009788493.1	NsSRS14	MANFFSLDGRGSSSQDQQQEISSSHHRINNRPVPTEISSESWFLYRNDHNQEMPTYKGFELWQNTTPQHQPEQQQQFRHPVYPLQDLYSTAVGLGVGPSQSGFDIFGGDQEASRSGFVMMRSGGAGISCQDCGNQAKKDCQHMRCRTCCKSRGFQCQTHVKSTWVPAAKRRERQQQLSALQQQQKERHDQLHLDHNNNKPKRQREDPSASSLVCTRLPSNTSASLMFIGLEVGKFPAKVSSAAVFQCIQMSSIEDAEDQLAYQAAVNIGGHVFKGILCDQGPESEYNNNMAAAGDTSSGGGSGSAGVQHHHNSAATAIIASGGAAAAAEASNFLDPSLFPAPLSTFMSAGTQFFPPPRSP
	>XP_009788499.1	NsSRS15	MANFFSLDGRGSSSQDQQQEISSSHHRINNRPVPTEISSESWFLYRNDHNQEMPTYKGFELWQNTTPQHQPEQQQQFRHPVYPLQDLYSTAVGLGVGPSQSGFDIFGGDQEASRSGFVMMRSGGAGISCQDCGNQAKKDCQHMRCRTCCKSRGFQCQTHVKSTWVPAAKRRERQQQLSALQQQQKERHDQLHLDHNNNKPKRQREDPSASSLVCTRLPSNTSGLEVGKFPAKVSSAAVFQCIQMSSIEDAEDQLAYQAAVNIGGHVFKGILCDQGPESEYNNNMAAAGDTSSGGGSGSAGVQHHHNSAATAIIASGGAAAAAEASNFLDPSLFPAPLSTFMSAGTQFFPPPRSP
	>XP_009794498.1	NsSRS16	MSGFFTLGGGGGGGNKEQEQEQDQLATNSFLLFKNEEIYNKGFELWQQYYQLHQQRAQTPQHQVQEMDFSVGVGPSNNRRIISGSSSSSGNNNIVGDDNNNNNNHNYSNSFRVMRATGGSSSSGVGGMNCQDCGNQAKKDCPHLRCRTCCKSRGFQCQTHVKSTWVPAAKRRERQQQLAALQQHNQQQQTQQLSLRADSNIIPKRPRENTSSSLACTRLPAISSGLEVGGHFPAEVSSQAVFRCVKVSAIDDAEDQFAYQTAVNIGGHLFKGILYDQGPEGRYSGGGGESSAGSGAAQQALNFITGATTSTTAAAATSHQQQHGTMFDPSVYPTPINAFMAGTQFFPPPRP
	>XP_009794499.1	NsSRS17	MSGFFTLGGGGGGGNKEQEQEQDQLATNSFLLFKNEEIYNKGFELWQQYYQLHQQRAQTPQHQVQEMDFSVGVGPSNNRRIISGSSSSSGNNNIVGDDNNNNNNHNYSNSFRVMRATGGSSSSGVGGMNCQDCGNQAKKDCPHLRCRTCCKSRGFQCQTHVKSTWVPAAKRRERQQQLAALQQHNQQQQTQQLSLRADSNIIPKRPRENTSSSLACTRLPAISSEVGGHFPAEVSSQAVFRCVKVSAIDDAEDQFAYQTAVNIGGHLFKGILYDQGPEGRYSGGGGESSAGSGAAQQALNFITGATTSTTAAAATSHQQQHGTMFDPSVYPTPINAFMAGTQFFPPPRP
	>XP_009796421.1	NsSRS18	MWSASSSRQMQINYGLSPEMGMFVVHPASFHHHHHHQHSHQENTINFDPINGSNISTTNTSLGVGVIPLLTATPLTNMVSFDDQDLVSRNRGNDNEGGGFQFFSNQQPQNSTNYTKNSNILGSGSGNNNIGGSVSSTSSATCQDCGNQAKKDCPHRRCRTCCKSRGFDCTTHVKSTWVPAARRRERQLIGGTSTNVNVAAGSSSQSTSSAKKPRLVNSQATTTASHTSTSNTTPPRSFDTSSSHQDASFKASLPGQVRAPAVFKCVRVTSVDDGDDEFAYQAVVRIGGHVFKGFLYDQGIEEGKDNNNYPNLSDLHLGGSGNIINETSDIYAASTGGGGLLGGSNYGNQIN
	>XP_009803737.1	NsSRS19	MSWFFGLGGGKEQEREELATNNLLLFKNEEIYNKGFKLWQQLQQQRQQQNHQNQEQDHVDFSICVGPASSSKPSNNSSNSCRSLGFRVMNMRGGGSSSGDQGNVNCQDCGNQAKKDCPHSRCRTCCRGRGFQCQTHVKSTWVPAARRRERQQQFSENHPKRPRDNISGSSLAYTRLPTTSSGLEVGSHFPPEVSSPAVFRCVKVSGVEDAEQHYAYQTAVNIGGHIFKGMLYDQGPDQSRYSSSGGGAGESSSQPLNFIAGATAAASSQQQQGVSIAMFDPASIYPNHQLSAFMAGTQFFPPPRP
	>XP_009803738.1	NsSRS20	MSWFFGLGGGKEQEREELATNNLLLFKNEEIYNKGFKLWQQLQQQRQQQNHQNQEQDHVDFSICVGPASSSKPSNNSSNSCRSLGFRVMNMRGGGSSSGDQGNVNCQDCGNQAKKDCPHSRCRTCCRGRGFQCQTHVKSTWVPAARRRERQQQFSENHPKRPRDNISGSSLAYTRLPTTSSEVGSHFPPEVSSPAVFRCVKVSGVEDAEQHYAYQTAVNIGGHIFKGMLYDQGPDQSRYSSSGGGAGESSSQPLNFIAGATAAASSQQQQGVSIAMFDPASIYPNHQLSAFMAGTQFFPPPRP
Earthmoss (Psycomitrella patens)	>Pp3c18_8920V3.1.p	PpSRS01	MEPWAARTLRDDVVRVMDVQPLNEQPPSRQVLQHNPQAAQPNVDAVPQVHQLQLDATKHKVPHAPQVPQVMGHGSTACQECGNQAKKDCSFQRCRTCCKSRDFDCATHVKSTWVPASKRRERQAAEAAAAAAGQPRPKSKRARTITLAAPAGATTSMTTTSANSPRGSDINSGHPSQPAQGRGGLPPEVRAQALFKCVRVTGVEDGENECAYQATVKIGGHIFKGLLYDQGLDLAQQAVTSNPSELQLGGGGAGGVRSNLPSSSPLLDPSGMYAGNPLLGGEDSRVAPWFT
	>Pp3c18_8920V3.2.p	PpSRS02	MEPWAARTLRDDVVRVMDVQPLNEQPPSRQVLQHNPQAAQPNVDAVPQVHQLQLDATKHKVPHAPQVPQVMGHGSTACQECGNQAKKDCSFQRCRTCCKSRDFDCATHVKSTWVPASKRRERQAAEAAAAAAGQPRPKSKRARTITLAAPAAQGRGGLPPEVRAQALFKCVRVTGVEDGENECAYQATVKIGGHIFKGLLYDQGLDLAQQAVTSNPSELQLGGGGAGGVRSNLPSSSPLLDPSGMYAGNPLLGGEDSRVAPWFT
	>Pp3c18_8920V3.3.p	PpSRS03	MLLASVAPAVTTGGGGGEGGVTTAGRVEGGPLKDGDLSLGFGYTPRVPVSLSDAVPPGSHPGLWGRPTATYSFRDAGAALGVGLAGTQREIFRDILSRGEEFGPAYAEVLKLDSERERAIQQQQQHHQQHHQQQHHQQHHHQHQHQQQQQQHHQQQQQQHHQQQQQQHHQQQQQQHHQQQQHHQHQQQSLQGVQRQVNIVGEGPNYGDTGRGEGESSSSGSVDKGGHQGDQAGMEPWAARTLRDDVVRVMDVQPLNEQPPSRQVLQHNPQAAQPNVDAVPQVHQLQLDATKHKVPHAPQVPQVMGHGSTACQECGNQAKKDCSFQRCRTCCKSRDFDCATHVKSTWVPASKRRERQAAEAAAAAAGQPRPKSKRARTITLAAPAGATTSMTTTSANSPR…
	>Pp3c21_16440V3.1.p	PpSRS04	MEPWGARTLRDDVVRVMDVQPLNEQPPSRQASQHNPQTAQPNVDAASQVHQLQLDAAKHKLPQVSQVMGHGSTACQECGNQAKKDCSFQRCRTCCKSRDFDCATHVKSTWVPASKRRERQAAEAAAAAAGQPRPKSKRARTLALSVPAGATTSMTTTSANSPRGSDINSGHPSQPAQGRGGLPPEVRAQALFKCVRVTGVEDGENECAYQATVKIGGHIFKGLLYDQGLDLAPPAVTSNPSELHLGGGGAGGVRSNLPSSSPLLDPSGMYGPGNALLGGEDSRVPPWFT
	>Pp3c21_16440V3.2.p	PpSRS05	MEPWGARTLRDDVVRVMDVQPLNEQPPSRQASQHNPQTAQPNVDAASQVHQLQLDAAKHKLPQVSQVMGHGSTACQECGNQAKKDCSFQRCRTCCKSRDFDCATHVKSTWVPASKRRERQAAEAAAAAAGQPRPKSKRARTLALSVPAGATTSMTTTSANSPRGSDINSGHPSQPAQGRGGLPPEVRAQALFKCVRVTGVEDGENECAYQATVKIGGHIFKGLLYDQGLDLAPPAVTSNPSELHLGGGGAGGVRSNLPSSSPLLDPSGMYGPGNALLGGEDSRVPPWFT
Common bean (Phaseolus vulgaris)	Phvul.001G009800.1	PvulSRS01	MAGFFSLGGRHNKAEQEEDQREDNNTNNTNHNNSQFLFRNVNEEIYNTNKGFEIWPQSSYHHNFTNYYSFGVGPSRRNNANTNNSSSNNVNDDVSVSFSDDSNRFGFTVMRSAGGVGGGGGGGMNCQDCGNQAKKDCSHLRCRTCCKSRGFQCQTHVKSTWVPAAKRRERQQQLATLQQQNQPPQFRGDHSKRHRESIEGAAAGGSLACAPLPITTTGLEVGQFPPELNSPAVFRCVKVSAMDAPDERYAYQTAVNIGGHVFKGILYDQGMDGPYASAGCEGSSGGGGEARALTLMAATTTATTAGNPFDASLYTAPMNAFMAGTQFFPPPRS
	Phvul.002G166700.1	PvulSRS02	MAGIFSLGGRGNNNEEEIPPPPDTLYWYNNKNDDVSSYHHHRGGGGFELWNQQQQQHFMDQGPPQPRPLFHQDLYSALGVGVGPSRPISDDQSSSRSGFMVGGGSGSGSGGISCQDCGNQAKKDCPHMRCRTCCKSRGFDCQTHVKSTWVPASRRRERQQQLSTLQQNIESSGELPKRQRERDHNNPTSSSLACTRLPSNPSSSGLEEVNFPAVVRSSAEFRCVRVSSMDEADEEYAYSTAVNIGGHVFKGILYDYGPEGNRNYMGGNGESSSTGVGGLNLTTGAVVSEPLLDPSSSLYPAPLNTFMPGSGTQFFPHPRS
	Phvul.003G258100.1	PvulSRS03	MANLFSLSGGRGSNNNQQDTTTNNEIPAAETLFWYAKNDDVSSYRGFELWNQQQEQHVMPPHVRPLLQRDLYSSGVGPSRGVSDDHSSSRSAFVAMRAAEGGISCQDCGNQAKKDCPHMRCRTCCKSRGYDCQTHVKSTWVPASKRRERQQQLAVLQEQQQQQRDLSKRPRDPTACTRLPSSEGLEEGHFPSLVSSPAEFRCVRVSCVEDADDRYAYQTAVNIGGHVFKGILYDYGPENSNNNNSNNSNNYMAGETSAGVAGAQPLNLTASGVVSSSGALVDPSSLYSAPVNTFMGGSGTQFFPHTRS
	Phvul.005G026300.1	PvulSRS04	MSMLGLRDLVLIAQTPSLHQHHHHHHHQHQGQQQPISENQTPNLPLPSSAALSVGFGIFPLLTATPCVPHPHQTNEIQECGGGGGGAATTTNYWNLKMCPEVNPPKKGVMNMDDDEDEDDERHHQHKGVMESEENGIYGPDFRVCQDCGNRAKKDCIFRRCRTCCKGRGYDCNTHVKSTWIPSIRRRERDMVVASAAGGGSKRPRAIVGSSQNATATSHSSNSNATTPKSLATISSHQDGRLKESLPGHVRAPAVFKCHRVSAIGNGEDEFAYLATVQISGHVFKGFLYDHGVDGKIGNAVPCVSELQLGNNCSGKNRECSSAIGLPNNTAYPASATSTFLNR
	Phvul.006G030400.1	PvulSRS05	MWPGVSRSFNHNLSPHHDIFVVAPASSFHHHHHNDAVLSDPSNNSSNGTALGVNVFPLLTATPCLTPESEGIMGNINNHRNRIQLWQPQESPQHQHADGVLASNHRGRIQLWQEHDESPPQQQQHPNAHVHEREGSGSGSGTSTCQDCGNQAKKDCSHRRCRTCCKSRGFDCVTHVKSTWVPAARRRERQLMTVTAAVGSSGSTSVTKKPRLVPSQTTTTSHTSTSNNTTTPPRSFDTGSSHQDVSFKESLPCQVRAPAEFKCVRVTAVDDGDDEYAYQAVVKIGGHVFKGFLYDQGVEDKSEYPNLSELHLGGGGNVASGSDGGGRNGVSSSSPMVDPSDVYAASGGVLLGGSSNYDRWITEEPHHVKRIVYVLN
	Phvul.008G200700.1	PvulSRS06	MWPGTNRSINYPEMGMFVVAPASSFHHHHHHQQPPPHDPVMADSLNPATALGVGVIPLLATTPCLEPDNFLGNRTRGGGIQFWQDQTPHQSHYMKKQQQQGLLDQSNTSSGNLVQNSGGLTASGTSSGGTTCQDCGNQAKKDCTNRRCRTCCKSRGFDCPTHVKSTWVPAARRRERQLMTTATVAVAGSSGSTSGTKKPRLIASQTTTTSHTSTSNTTPPRSFDTSSSHQDAGFKESLPGQVRAPAVFKCVRVTAVEDGEDEYAYQAVVKIGGHVFKGFLYDQGVENRDVYPNLSELHLGGGSGSGGSGGMGRNGVSSSPMMDPSDVYAASGGGLLGGSSAYGNPMN
	Phvul.009G004300.1	PvulSRS07	MKRGTQGEEEVVSRGSKCQDCGNQAKKECSYSRCRTCCKNKGFKCQTHIRSTWTPVDKRRNTEQPPSPPHNFHGDVPQKHNQINPYSVSGLEMKFPGAANSMAMFRCVQVRSMDDAVNEVAYQTSVNIGGHVFSGILYDQGPEQGYNHKGGSSSGLVDEQQRNNLGLMNNASIHSRDSSGVTIASAGHGEPLFPPPPYPFPLASFRPGMPYFTYPRS
	Phvul.009G013700	PvulSRS08	MAGFFPLGGTRRGGPQNKEEGEVGKGDSNNNNNGNNLLLFRNEEIYNKGFEIWPESYQPQAAPQNLSNYFAFGVGPSRRNCSEEVSLCVSDESTRFGLTVMRSGGAGSSGINCQDCGNQAKKDCTHLRCRTCCKTRGFPCQTHVKSTWVPAAKRRERQQQLSALQNPQQFRGENIPKRHHRDTQLVSAPQPIAGLQLGQFPPEVSTSAVFRCVRVSAVDASDEQCAYQTSVSIGGHVFKGILYDQGPESSYTSAATEGSSGGDPRQLGLITGAATATTTSGNHPFDPSLYPAPLNAFMSGTQFFHPPRS
	Phvul.011G041200.1	PvulSRS09	MSTMQEQGLETVVKGSKCEECGNQAKKDCAYSRCRTCCKNKGFKCQTHIRSTWIPVDRRRHKVEHQPLTTNLQQGDIPKRHKHNPYSSLEFKFPAVTSSMASFSCVQVRSMDDTVNETAYQTSVNIGGHVFSGFLYDQGPEQSFNAKGDNPFDQQHDLNLRSVSLHTRDGASATMPPLSLTASQEPFFIPHHSFPLASFRPDLTYLSHPKP
	Phvul.011G206400.1	PvulSRS10	MNMLGLRDLVFIAPTASQLHHHQHQHQHQHHHPISAEHHPNLPLPSPASLSVGLGIFPLLTVPHTNDVHDQAQDCANNTTTNHNTNYWNLKMCGVSEVNSTRKGVEDEGRSNKHVMETEESGEFRVCQDCGNRAKRDCSYKRCRTCCKGRGFDCNTHVKSTWVPASLRRSGGNSGSDANGDGDGDGDGGASKRLRTIGSSKNAAATSLSSTSNATPSKSFSLDTSSCQQDAGFKQSLPRHVRAPAVFRCHRVSAIGSGEDEIAYLATVHISGHVFKGFLYDHGADARNDVPSISELQLGNNGSGKSNNNRECSSAIGVPTTAYPASVC
Sesame (Sesamum indicum)	SIN_1015187	SinSRS01	MILEHTNLLQTGSGGSSGGGIGGSSSMGATTCQDCGNQAKKDCSHRRCRTCCKSRGYDCATHVKSTWVPAARRRERQLMGGNPAAAGSSQSTSGTKKPRLGGASQTTTTASHTSTSNTTPPRSFETSSSHQDASFKDSLPGQVRAPAVFKCVRVTALDDGEDEYAYQAVVRIGGHVFKGFLYDQGVEGRDGLPNISELHLGGGGGGNGGGRNGASSSPPVLDPSDIYAASGGGLLGGSSYGNPIN
	SIN_1003328	SinSRS02	MPARLPPPLPTPAQRPLGGCGPPPPAPLNCGLPPEFFFVAPASSFQHHHSEAAAGAATTINFDPHSLNASNAIGVGVGVIPLLTATPCLAQSGIGGSGGGSGAAADDDVLNNSRHRGGGGMQLWQHQQGQNSPANYLKKPMVVDHTNLLQSGNGGGSTSGGIGGSSSMGATTCQDCGNQAKKDCSHRRCRTCCRSRGYDCTTHVKSTWVPAARRRERQLMATNTATAGSSQSTSGAKKPRLSGASQTTSHTSTSNTTPPRSFDTSSSHQNASFKESLPGQVRAPAVFKCVRVTALDDGEDEYAYQAVVRIGGHVFKGFLYDQGFEGNRGDGFPNISELHLGGSGSGGGGGGGTGGGRNGAASSSPPVLDPSDMYASSGGGLLAGSTYGNPIN
	SIN_1009100	SinSRS03	MSEFFSLGGGKEQDQDQQTDNNNSLFLFKNEEIYNKGFELWQQYNQLHQQRLVSQQQQQHHSIQDVHFSIGPSNIGDEPSDYSYGSAAGFRVMNQGRGKNDAGVNCQDCGNQAKKDCVHMRCRTCCKSRGFPCQTHVKSTWVPAAKRREKQQQQPGSNLQQDQQQLTVGGENPKRLRENYPGGGFRELGRHLPPEVNSPALFRCVKVSATDDAEEHFAYQTAVNIGGHVFKGILYDQGPESQYSGGGGESSSACAGSSQQSHDLITATTNQNVTMLDPSIYPPHLSGFMAGTQFFPPPRP
	SIN_1011561	SinSRS04	MSGFFSLGGKDQDQDQQTDTNNSLFLFKNEEIYNKGFELWQQYYQLHQQRLHSYQHQTQHLSIQDVDFSVGPSSSSRRNNNLINSLGDESSHYSYRSAAGFRVMRQGRGGNEGMNCQDCGNQAKKDCQHLRCRTCCKSRGFQCQTHVKSTWVPAAKRRERQQQLAALQQDHHQQQLTTRGDQNPKRLRENPGGGGASSALACTTSRLPATTSGFELGHFPPEVNSPAVFRCVRVSAVDDAEEHLAYQTAVNIGGHVFKGILYDQGPETRYPPGGGGESSSGGGGGGSQQQPLDFIAAAAATSSATATTTTSNPNITMLDPSLYPTPLTAFMAGTQFFPPPRH
	SIN_1021065	SinSRS05	MAASSPAKSSAAAIDCATAGAIPSSSNASKSLRGLNKPKCIKCGNVARSRCPYQSCKNCCAKAQNPCHIHVLKGNSSFPDKPPSSSSPLFDQQATDVSHSGNSHRLRQLSNNFAQFSNLQTPLRSRKPLTKKDAQVINEWRFLKLKGFKDGNVEAESEAFDRYMQNVALLEEVFLMNSAPDDQIQEGPSFGVNSRSDGEDTERIIHGLKLKLRSSSVRTDNFRKRIQYIVDQGLRKLGKPELIDGTGDLSDGEGQARPAKKTKSLPGDRAMAIRDVSDKLNKARNEEDLKGCWEMASEIFRWDAKLSQTEPGEFLISREINAKHDASTDQESSLFPPKWVSPATIDQEAFSRIDAQFSSLEEIEDL
	SIN_1014746	SinSRS06	MMRSEEIGGINSSSSSSSRCQDCGNQAKRDCEHLRCRTCCKSRGFECQTHVKSTWVPVSRRRPRQHIMHQHHQISDTVEDQHHGSNPKRFREQNPALLGLEEGDFPGEVSFPAVFRCVRVSSMDNVVDQYAYQTSVSIGGHVFTGILYDQGPEADGTGNYVTGGSSSSAGIGLFEQTHFVNSTTATATGTTSSPYPSPFCAFTATSSQFFHQYPKS
Spikemoss (Selaginella moellendorffii)	>409925	SmSRS01	MIYRVLDENSFDLGPRYRNCSVVLGGRELLREKNPAAVAPAVVESRTGSSTTTRDLIGASSSGGGSTTPPWIVPSSRDWLLDPGGPGEHDHHGGVIQSAASGAGGSDGWGRAVGYGFVGSHPSPGDGGLGPGGGGGGGGGDGGGGASGLGLAPHHHLHLRDILGRGPASEEFGYHQLHQQHQRASLRGSSEHAHHHHHHPGEQGGDQGGQGSRVASFEAYETTRNVGGIGLLRTGLEAAAAAVGGAPDPKSVADHPHHHHHHHHAPWASAPPPSVRELSGARGIDVVPLAERFSLEAAAAAAQEKNPHPLQLVQIQGGAQQQAQQNPITSVALIQSQNPSPSQQQQQQQGTDSSSSRPHGRGHQPGGATCKECGNQAKKDCQFQRCRTCCKSRNYDCST…
	>59069	SmSRS02	GATCKECGNQAKKDCQFQRCRTCCKSRNYDCSTHVKSTWVPAAKRRERQALEAAAIAAGQPRPRSKRTRSLALGGGSSSAAAQALFKCVKVTGIEDGENEYAYQATVKIGGHVFKGVLYDQGV
	>59082	SmSRS03	CKECGNQAKKDCVYQRCRTCCKSRGFECSTHVRSTWVPAAKRRERQLAEAAAVASGQPPLHLFATDAGSLPSEVRAQAVFKCVKVTSVEDGGEDEFAYQAVVRIGGRIFKGVLQDHGV
	>59269	SmSRS04	GNQAKKDCQFQRCRTCCKSRSFDCQTHVKSTWVPAAHRRNRGAAAHAGGDAMIDSSSYDHESSGLPRSKRARAAFPAEVRAQAVFRCVKLTSVEDGEDEYAYQTTVRIGGHIFKGVLHDRGI
Spinach (Spinacia oleracea)	Sp_009360_ufwn.t1	SoSRS01	MIFHWASXAVTAASAASLWPTSSRVGYGLPPEMGMFVVAPATSFQHESSLMLDGPHHHHHHHGHGGGGGNNAATGLGVGMGVGVIPLFNAGPCLNVAGGGGGGGGGGEGGGGGGGNLDGHDSFMGRNRTGAMQLWQTQQQQMNNYPKKSINFDPNGLGSSFLHSPPPSSAVGCGGNLTCQDCGNQAKKDCSHRRCRTCCRSRGFDCSTHVKSTWVPAARRRERQMVGVVSGAAGTHGTGGGSVGGGGGGGGGASSGSTSGAKKPRLISSQNTATTSHTSTSNTPPRSFDTSSSHQDASFKESLPGQVRPPAVFKCVRVTAVEDGEDEFAYQAMVKIAGHVFKGFLYDQGVEPRDGFPNLSELHLGGGSGGGGGSSGGGGGGRNGGGASSSSPLLDPSDV…
	Sp_027620_xdmn.t1	SoSRS02	MRSSSGGSSSTNTTSCQDCGNKAKRDCEHTRCRTCCKSRSFQCATHVKSTWVPVARRRARQRQHHQQHPQLRLSATSLDHFNQYLPLPLSLSNIHHHTPTSAGLEGGNFPAEVNSSATFRCIRVSSEDNVVDQYAYQTSISVGGHVFKGVLYDQGPTTALVTTTSDHHPFNISASTVTVAATHPGGGGENLYHPPSLYSGPSFNAFLPGMQFFPHPRP
	Sp_039780_ijwt.t1	SoSRS03	MAATATSSPVLSNNGSETSANTGISTPPPPSATPPAAVKSPGLPTIMLQRPEPPKNLRGLNKPKCIKCGNVARSRCPYQSCKSCCSKAQNPCHIHVLKPNSTLADRGASTNSTVPELQPNEAATPGPQSKAASLRQLSSTFSQFNSVNVSVRSRKPLTRKEALTINEWRFAKLKEYKEANVEAENEAFDRYMQNISLLEEVFNVNNSEMPESDENGSLVSTSGERMEIISETKVMLRSNPIRTDAFRKRIRETIDQGLIKLQKTNSIDEPSNNLDNNEDDPVPKEDKSLWSELNFKLNKARNEEDLMVCMQKKSKITGQEKLSSGNKTENTDLDSALESAVSLKLLKSSNNPSSPSLKSHLRSVVIAAHLPPDQRQTAVPLGHHLRTPDLHRTTHFRRS…
	Sp_092570_ctak.t1	SoSRS04	MAAFFSLGTPGSSGSQNPQNNNNNNNNNSNNNNNTSSVPSDNQVQNSWVHTSNNNNNPGLVVYSRNNSEEIYPKGSFEIWQQYVQVHHHHHVPKLHLHQDYHHHHHHQHQHQQHVFLGESQPSVVVGPSSAAPSSRRIFGFDEYPNNNDNNSNNNNNNNNNTVLSSGSGSGRSSSGFRQLGVGSGSGSGGMNCQDCGNQAKKDCVHLRCRTCCKSRGFDCSTHVKSTWVPAAKRRERQQQLTSLQPQQQQQQQQQTQQMMRSSGGFGSGGEKRTRENRSSSRVLAHAATTTTTTTTAAGLEVGDFPSELNSPAVFRCVRVSALDDPDEQFAYQTAVNIGGHIFKGILYDQGPETRYGGESSSEGRAQQHGLMLPAATTTTDLMGTVGGGSINNATTASL…
	Sp_179220_ofso.t1	SoSRS05	MSGFFSLGTGTENGREINDNNNITYRNEQIIPSSELWQQLPYESARSVDANNNSNNNNRYNLMMMRMSSSSGGGGGGGSGSGSGSGGGNISCQDCGNQAKKDCVYMRCRTCCKSRGYDCTTHVKSTWIPATIRRERHHKLVQHPDPPPQQPPQQEEQQHQHQQQQYLGVTPKRSRRENCSTSSLVCTQLPFSGTTNTNNTVGMEVGNFPAEVSSSAVFRCVRVSGVDDTEDEYAYQTAVNIGGHVFKGILYDQGPDQPRQGSNPTPTPPNYGGGGGGGGGESSSAARGTTTTTSVGGPTIGYNLDPSFYPLPLNTYLPPGTPFYPNPRP

## Sheet: SP3 Gene Duplication Data
syntenic relationship of Arabidopsis with maize (Z. mays), melon (C. melo), soybean (G. max), mustard (B. rapa), and tomato (S. Lycopersicum)
Arabidopsis thaliana vs Arabidopsis thaliana
Chr1	28351522	28353549	Chr2	9158310	9159732	200200200	AtSRS5.match.AtSRS3
Chr3	18964129	18966405	Chr4	17155556	17157645	200200200	AtSTY1.match.AtSTY2
Chr3	18964129	18966405	Chr5	26503115	26506809	200200200	AtSTY1.match.AtSHI
Chr1	6838120	6840293	Chr4	17155556	17157645	200200200	AtSRS7.match.AtSTY2
Chr1	6838120	6840293	Chr2	9158310	9159732	200200200	AtSRS7.match.AtSRS3
Chr4	17155556	17157645	Chr5	26503115	26506809	200200200	AtSTY2.match.AtSHI
Chr2	7876544	7878072	Chr3	18964129	18966405	200200200	AtSRS4.match.AtSTY1
Chr2	7876544	7878072	Chr4	17155556	17157645	200200200	AtSRS4.match.AtSTY2
Chr2	7876544	7878072	Chr5	26503115	26506809	200200200	AtSRS4.match.AtSHI
Arabidopsis thaliana vs Zea mays
Chr5	61338949	61341729	Chr4	17155556	17157645	200200200	ZmPHJ40.05G134100.1.v1.1.match.AtSTY2.1
Arabidopsis thaliana vs Cucumis Melo
Chr1	28351522	28353549	chr03	27196012	27197745	200200200	AtSRS10.1.Araport11.447.match.MELO3C010984.1
Chr1	28351522	28353549	chr04	4044534	4046000	200200200	AtSRS10.1.Araport11.447.match.MELO3C003781.1
Chr3	18964129	18966405	chr07	22460299	22461855	200200200	AtSRS09.1.Araport11.447.match.MELO3C027042.1
Chr3	18964129	18966405	chr08	5915372	5917769	200200200	AtSRS09.1.Araport11.447.match.MELO3C007877.1
Chr1	6838120	6840293	chr03	27196012	27197745	200200200	AtSRS08.1.Araport11.447.match.MELO3C010984.1
Chr1	6838120	6840293	chr08	5915372	5917769	200200200	AtSRS08.1.Araport11.447.match.MELO3C007877.1
Chr1	6838120	6840293	chr04	4044534	4046000	200200200	AtSRS08.1.Araport11.447.match.MELO3C003781.1
Chr5	26503115	26506809	chr08	5915372	5917769	200200200	AtSRS07.2.Araport11.447.match.MELO3C007877.1
Chr4	17155556	17157645	chr07	22460299	22461855	200200200	AtSRS06.1.Araport11.447.match.MELO3C027042.1
Chr4	17155556	17157645	chr08	5915372	5917769	200200200	AtSRS06.1.Araport11.447.match.MELO3C007877.1
Chr4	17155556	17157645	chr04	4044534	4046000	200200200	AtSRS06.1.Araport11.447.match.MELO3C003781.1
Chr5	3987375	3989833	chr05	1367261	1368183	200200200	AtSRS05.4.Araport11.447.match.MELO3C014564.1
Arabidopsis vs Glycine max
Chr4	17155556	17157645	Gm17	43316218	43319100	200200200	AtSTY2.1.match.Glyma.17G255000.1.Wm82.a6.v1
Chr4	17155556	17157645	Gm11	5431272	5434113	200200200	AtSTY2.1.match.Glyma.11G072500.1.Wm82.a6.v1
Chr4	17155556	17157645	Gm06	2142522	2146548	200200200	AtSTY2.1.match.Glyma.06G027500.4.Wm82.a6.v1
Chr4	17155556	17157645	Gm04	2233141	2235712	200200200	AtSTY2.1.match.Glyma.04G027400.1.Wm82.a6.v1
Chr3	18964129	18966405	Gm16	30824987	30829818	200200200	AtSTY1.1.match.Glyma.16G132100.7.Wm82.a6.v1
Chr3	18964129	18966405	Gm06	2142522	2146548	200200200	AtSTY1.1.match.Glyma.06G027500.4.Wm82.a6.v1
Chr3	18964129	18966405	Gm04	2233141	2235712	200200200	AtSTY1.1.match.Glyma.04G027400.1.Wm82.a6.v1
Chr3	18964129	18966405	Gm02	4716306	4720745	200200200	AtSTY1.1..match.Glyma.02G051900.1.Wm82.a6.v1
Chr3	18964129	18966405	Gm01	53545405	53549377	200200200	AtSTY1.1..match.Glyma.01G170700.1.Wm82.a6.v1
Chr1	6838120	6840293	Gm17	43316218	43319100	200200200	AtSRS7.1..match.Glyma.17G255000.1.Wm82.a6.v1
Chr1	6838120	6840293	Gm16	30824987	30829818	200200200	AtSRS7.1..match.Glyma.16G132100.7.Wm82.a6.v1
Chr1	6838120	6840293	Gm14	51818091	51823747	200200200	AtSRS7.1..match.Glyma.14G216400.1.Wm82.a6.v1
Chr1	6838120	6840293	Gm06	2142522	2146548	200200200	AtSRS7.1..match.Glyma.06G027500.4.Wm82.a6.v1
Chr1	6838120	6840293	Gm04	2233141	2235712	200200200	AtSRS7.1..match.Glyma.04G027400.1.Wm82.a6.v1
Chr1	6838120	6840293	Gm02	4716306	4720745	200200200	AtSRS7.1..match.Glyma.02G051900.1.Wm82.a6.v1
Chr3	20146626	20148221	Gm15	46521014	46522816	200200200	AtSRS6.1..match.Glyma.15G235000.1.Wm82.a6.v1
Chr3	20146626	20148221	Gm11	18976455	18977909	200200200	AtSRS6.1..match.Glyma.11G155400.1.Wm82.a6.v1
Chr1	28351522	28353549	Gm17	43316218	43319100	200200200	AtSRS5.1..match.Glyma.17G255000.1.Wm82.a6.v1
Chr1	28351522	28353549	Gm16	30824987	30829818	200200200	AtSRS5.1..match.Glyma.16G132100.7.Wm82.a6.v1
Chr1	28351522	28353549	Gm14	51818091	51823747	200200200	AtSRS5.1..match.Glyma.14G216400.1.Wm82.a6.v1
Chr1	28351522	28353549	Gm12	2847045	2848340	200200200	AtSRS5.1..match.Glyma.12G039100.1.Wm82.a6.v1
Chr1	28351522	28353549	Gm06	2142522	2146548	200200200	AtSRS5.1..match.Glyma.06G027500.4.Wm82.a6.v1
Chr1	28351522	28353549	Gm06	735013	736228	200200200	AtSRS5.1..match.Glyma.06G009200.1.Wm82.a6.v1
Chr1	28351522	28353549	Gm04	2233141	2235712	200200200	AtSRS5.1..match.Glyma.04G027400.1.Wm82.a6.v1
Chr1	28351522	28353549	Gm04	755417	756877	200200200	AtSRS5.1..match.Glyma.04G009300.2.Wm82.a6.v1
Chr1	28351522	28353549	Gm02	4716306	4720745	200200200	AtSRS5.1..match.Glyma.02G051900.1.Wm82.a6.v1
Chr1	28351522	28353549	Gm01	53545405	53549377	200200200	AtSRS5.1..match.Glyma.01G170700.1.Wm82.a6.v1
Chr2	7876544	7878072	Gm11	8653291	8655174	200200200	AtSRS4.1..match.Glyma.11G113200.1.Wm82.a6.v1
Chr2	7876544	7878072	Gm06	735013	736228	200200200	AtSRS4.1..match.Glyma.06G009200.1.Wm82.a6.v1
Chr2	9158310	9159732	Gm12	2847045	2848340	200200200	AtSRS3.2..match.Glyma.12G039100.1.Wm82.a6.v1
Chr2	9158310	9159732	Gm11	8653291	8655174	200200200	AtSRS3.2..match.Glyma.11G113200.1.Wm82.a6.v1
Chr2	9158310	9159732	Gm06	735013	736228	200200200	AtSRS3.2..match.Glyma.06G009200.1.Wm82.a6.v1
Chr2	9158310	9159732	Gm04	755417	756877	200200200	AtSRS3.2..match.Glyma.04G009300.2.Wm82.a6.v1
Chr5	26503115	26506809	Gm17	43316218	43319100	200200200	AtSHI.2..match.Glyma.17G255000.1.Wm82.a6.v1
Chr5	26503115	26506809	Gm16	30824987	30829818	200200200	AtSHI.2..match.Glyma.16G132100.7.Wm82.a6.v1
Chr5	26503115	26506809	Gm04	755417	756877	200200200	AtSHI.2..match.Glyma.04G009300.2.Wm82.a6.v1
Chr5	26503115	26506809	Gm02	4716306	4720745	200200200	AtSHI.2..match.Glyma.02G051900.1.Wm82.a6.v1
Chr5	3987375	3989833	Gm20	5572594	5576085	200200200	AtLRP1.4..match.Glyma.20G037100.1.Wm82.a6.v1
Chr5	3987375	3989833	Gm14	2599111	2604414	200200200	AtLRP1.4..match.Glyma.14G034800.1.Wm82.a6.v1
Chr5	3987375	3989833	Gm02	52423122	52425609	200200200	AtLRP1.4..match.Glyma.02G280000.1.Wm82.a6.v1
Arabidopsis vs Brassica rapa
Chr5	26503115	26506809	Scaffold58736	461150	462493	200200200	AtSHI.2.Araport11.447.match.Brara.K01320.1.v1.3
Chr4	17155556	17157645	Scaffold58736	461150	462493	200200200	AtSTY2.1.Araport11.447.match.Brara.K01320.1.v1.3
Chr3	18964129	18966405	Scaffold58736	461150	462493	200200200	AtSTY1.1.Araport11.447.match.Brara.K01320.1.v1.3
Chr2	7876544	7878072	Scaffold58736	461150	462493	200200200	AtSRS4.1.Araport11.447.match.Brara.K01320.1.v1.3
A10	16472614	16474886	Chr5	3987375	3989833	200200200	Brara.J02160.1.v1.3.match.AtLRP1.4.Araport11.447
A09	39921216	39922854	Chr1	6838120	6840293	200200200	Brara.I04644.1.v1.3.match.AtSRS7.1.Araport11.447
A09	39921216	39922854	Chr1	28351522	28353549	200200200	Brara.I04644.1.v1.3.match.AtSRS5.1.Araport11.447
A09	39921216	39922854	Chr2	9158310	9159732	200200200	Brara.I04644.1.v1.3.match.AtSRS3.2.Araport11.447
A09	34355881	34356990	Chr3	20146626	20148221	200200200	Brara.I03709.1.v1.3.match.AtSRS6.1.Araport11.447
A09	32608503	32610780	Chr4	17155556	17157645	200200200	Brara.I03444.1.v1.3.match.AtSTY2.1.Araport11.447
A09	32608503	32610780	Chr3	18964129	18966405	200200200	Brara.I03444.1.v1.3.match.AtSTY1.1.Araport11.447
A09	32608503	32610780	Chr5	26503115	26506809	200200200	Brara.I03444.1.v1.3.match.AtSHI.2.Araport11.447
A07	25498918	25500882	Chr4	17155556	17157645	200200200	Brara.G03355.1.v1.3.match.AtSTY2.1.Araport11.447
A07	25498918	25500882	Chr1	6838120	6840293	200200200	Brara.G03355.1.v1.3.match.AtSRS7.1.Araport11.447
A07	25498918	25500882	Chr1	28351522	28353549	200200200	Brara.G03355.1.v1.3.match.AtSRS5.1.Araport11.447
A07	19333727	19335557	Chr1	6838120	6840293	200200200	Brara.G02219.1.v1.3.match.AtSRS7.1.Araport11.447
A07	19333727	19335557	Chr1	28351522	28353549	200200200	Brara.G02219.1.v1.3.match.AtSRS5.1.Araport11.447
A07	13379487	13381535	Chr5	26503115	26506809	200200200	Brara.G01270.1.v1.3.match.AtSHI.2.Araport11.447
A07	1935819	1936800	Chr4	17155556	17157645	200200200	Brara.G00211.1.v1.3.match.AtSTY2.1.Araport11.447
A07	1935819	1936800	Chr3	18964129	18966405	200200200	Brara.G00211.1.v1.3.match.AtSTY1.1.Araport11.447
A07	1935819	1936800	Chr2	7876544	7878072	200200200	Brara.G00211.1.v1.3.match.AtSRS4.1.Araport11.447
A07	1935819	1936800	Chr5	26503115	26506809	200200200	Brara.G00211.1.v1.3.match.AtSHI.2.Araport11.447
A06	7986199	7988021	Chr1	6838120	6840293	200200200	Brara.F01406.1.v1.3.match.AtSRS7.1.Araport11.447
A06	7986199	7988021	Chr1	28351522	28353549	200200200	Brara.F01406.1.v1.3.match.AtSRS5.1.Araport11.447
A04	11477374	11478577	Chr2	9158310	9159732	200200200	Brara.D01262.1.v1.3.match.AtSRS3.2.Araport11.447
A04	3493803	3494943	Chr3	20146626	20148221	200200200	Brara.D00469.1.v1.3.match.AtSRS6.1.Araport11.447
A02	14316117	14317993	Chr1	6838120	6840293	200200200	Brara.B02233.1.v1.3.match.AtSRS7.1.Araport11.447
A02	14316117	14317993	Chr1	28351522	28353549	200200200	Brara.B02233.1.v1.3.match.AtSRS5.1.Araport11.447
A02	2087987	2091585	Chr5	3987375	3989833	200200200	Brara.B00452.1.v1.3.match.AtLRP1.4.Araport11.447
A01	12826349	12828847	Chr3	18964129	18966405	200200200	Brara.A02107.1.v1.3.match.AtSTY1.1.Araport11.447
A01	12826349	12828847	Chr5	26503115	26506809	200200200	Brara.A02107.1.v1.3.match.AtSHI.2.Araport11.447
A01	1138580	1140497	Chr4	17155556	17157645	200200200	Brara.A00212.1.v1.3.match.AtSTY2.1.Araport11.447
A01	1138580	1140497	Chr2	7876544	7878072	200200200	Brara.A00212.1.v1.3.match.AtSRS4.1.Araport11.447
Arabidopsis vs Solanum lycopersicum
Chr4	17155556	17157645	SL2.50ch04	65027253	65028866	200200200	AtSTY2.1.Araport11.447.match.Solyc04g080970.2.1.ITAG2.4
Chr4	17155556	17157645	SL2.50ch02	47778276	47780432	200200200	AtSTY2.1.Araport11.447.match.Solyc02g084680.2.1.ITAG2.4
Chr4	17155556	17157645	SL2.50ch02	34001838	34005081	200200200	AtSTY2.1.Araport11.447.match.Solyc02g062400.2.1.ITAG2.4
Chr4	17155556	17157645	SL2.50ch01	96917294	96919283	200200200	AtSTY2.1.Araport11.447.match.Solyc01g110140.2.1.ITAG2.4
Chr3	18964129	18966405	SL2.50ch03	5274959	5275309	200200200	AtSTY1.1.Araport11.447.match.Solyc03g033680.1.1.ITAG2.4
Chr3	18964129	18966405	SL2.50ch02	47778276	47780432	200200200	AtSTY1.1.Araport11.447.match.Solyc02g084680.2.1.ITAG2.4
Chr3	18964129	18966405	SL2.50ch02	34001838	34005081	200200200	AtSTY1.1.Araport11.447.match.Solyc02g062400.2.1.ITAG2.4
Chr1	6838120	6840293	SL2.50ch04	65027253	65028866	200200200	AtSRS7.1.Araport11.447.match.Solyc04g080970.2.1.ITAG2.4
Chr1	6838120	6840293	SL2.50ch02	47778276	47780432	200200200	AtSRS7.1.Araport11.447.match.Solyc02g084680.2.1.ITAG2.4
Chr1	28351522	28353549	SL2.50ch04	65027253	65028866	200200200	AtSRS5.1.Araport11.447.match.Solyc04g080970.2.1.ITAG2.4
Chr1	28351522	28353549	SL2.50ch03	5274959	5275309	200200200	AtSRS5.1.Araport11.447.match.Solyc03g033680.1.1.ITAG2.4
Chr1	28351522	28353549	SL2.50ch02	47778276	47780432	200200200	AtSRS5.1.Araport11.447.match.Solyc02g084680.2.1.ITAG2.4
Chr1	28351522	28353549	SL2.50ch01	96917294	96919283	200200200	AtSRS5.1.Araport11.447.match.Solyc01g110140.2.1.ITAG2.4
Chr2	9158310	9159732	SL2.50ch10	54550728	54552242	200200200	AtSRS3.2.Araport11.447.match.Solyc10g054070.1.1.ITAG2.4
Chr5	26503115	26506809	SL2.50ch04	65027253	65028866	200200200	AtSHI.2.Araport11.447.match.Solyc04g080970.2.1.ITAG2.4
Chr5	26503115	26506809	SL2.50ch02	47778276	47780432	200200200	AtSHI.2.Araport11.447.match.Solyc02g084680.2.1.ITAG2.4
Chr5	26503115	26506809	SL2.50ch02	34001838	34005081	200200200	AtSHI.2.Araport11.447.match.Solyc02g062400.2.1.ITAG2.4

## Sheet: SP4 Similarity Analysis
						1.Idenity Results of AtSRS protein
				AtSHI	1
				AtSTY1	0.5925	1
				AtSTY2	0.42	0.355	1
				AtLRP1	0.3025	0.235	0.3425	1
				AtSRS3	0.3125	0.2275	0.35	0.2874	1
				AtSRS4	0.395	0.31	0.5675	0.3075	0.475	1
				AtSRS5	0.3475	0.2874	0.3425	0.2925	0.345	0.295	1
				AtSRS6	0.26	0.1825	0.2874	0.4175	0.51	0.4575	0.265	1
				AtSRS7	0.3575	0.295	0.345	0.2775	0.35	0.3075	0.655	0.2325	1
				AtSRS8	0.37	0.3675	0.3425	0.3325	0.4575	0.51	0.2675	0.4875	0.2625	1
					AtSHI	AtSTY1	AtSTY2	AtLRP1	AtSRS3	AtSRS4	AtSRS5	AtSRS6	AtSRS7	AtSRS8
						IDENTITY STATS
						min = 18.25
						max = 65.5
						mean = 35.5271111111111
						stddev = 10.0515998996782
						2.Similarity results of AtSRS protein
				AtSHI	1
				AtSTY1	0.585	1
				AtSTY2	0.375	0.395	1
				AtLRP1	0.2825	0.2875	0.27	1
				AtSRS3	0.2025	0.21	0.215	0.1875	1
				AtSRS4	0.2875	0.29	0.405	0.1975	0.1875	1
				AtSRS5	0.3375	0.34	0.3075	0.2675	0.25	0.2475	1
				AtSRS6	0.1675	0.1725	0.1675	0.2625	0.1525	0.1475	0.1775	1
				AtSRS7	0.32	0.325	0.3125	0.26	0.2425	0.2425	0.615	0.175	1
				AtSRS8	0.245	0.31	0.195	0.175	0.115	0.1575	0.1825	0.1125	0.17	1
					AtSHI	AtSTY1	AtSTY2	AtLRP1	AtSRS3	AtSRS4	AtSRS5	AtSRS6	AtSRS7	AtSRS8
						SIMILARITY STATS
						min = 11.25
						max = 100
						mean = 33.06
						stddev = 24.3677327628157

## Sheet: SP5 Gene Ontology data
Gene ontology (GO) analysis of functional enrichment of AtSRS genes
GO term	Category	Enrichment score
Floral organ development	Biological process	46.25
Flower development	Biological process	33.04
Reproductive shoot system development	Biological process	31.54
Gynoecium development	Biological process	70.69
Floral whorl development	Biological process	57.03
Negative regulation of gibberellic acid signaling pathway	Biological process	100.01
Regulation of gibberellic acid signaling pathway	Biological process	100.01
Negative regulation of signal transduction	Biological process	63.5
Anther development	Biological process	100.01
Positive regulation of DNA-templated transcription	Biological process	66.61
Protein heterodimerization activity	Molecular function	61.67
Protein dimerization activity	Molecular function	17.07
Protein binding	Molecular function	3.45
Binding	Molecular function	2.56
Protein homodimerization activity	Molecular function	10.54
Identical protein binding	Molecular function	5.95
Membrane-bounded organelle	Cellular component	1.4
Organelle	Cellular component	1.38
Cellular anatomical structure	Cellular component	1.12
Intracellular organelle	Cellular component	1.38
Intracellular anatomical structure	Cellular component	1.27
Nucleus	Cellular component	2.59
Intracellular membrane-bounded organelle	Cellular component	1.4

## Sheet: SP6 KEGG Pathway Enrichment
		KEGG Pathway Enrichment Analysis
	KEGG ID	Pathway name	#genes in coex list	#genes in genome	-log10(p)	Link to the KEGG* map
						(Multiple genes)
AtSHI	ath3440	Homologous recombination	1	60	-
	ath2010	ABC transporters	1	68	-
	ath940	Phenylpropanoid biosynthesis	1	128	-
	ath3040	Spliceosome	1	203	-
	ath2010	ABC transporters	2	51	2.13
	ath73	Cutin, suberine and wax biosynthesis	1	37	-
AtSTY1	ath4016	MAPK signaling pathway - plant	1	139	-
	ath4075	Plant hormone signal transduction	2	291	-
	ath73	Cutin, suberine and wax biosynthesis	2	26	2.71
	ath2010	ABC transporters	1	68	-
	ath3013	Nucleocytoplasmic transport	1	103	-
AtSTY2	ath3015	mRNA surveillance pathway	2	119	-
	ath4075	Plant hormone signal transduction	3	291	-
	ath250	Alanine, aspartate and glutamate metabolism	1	51	-
	ath2010	ABC transporters	1	68	-
AtLRP1	ath230	Purine metabolism	1	87	-
	ath940	Phenylpropanoid biosynthesis	1	128	-
	ath500	Starch and sucrose metabolism	1	172	-
	ath2010	ABC transporters	1	68	-
	ath3013	Nucleocytoplasmic transport	1	103	-
	ath480	Glutathione metabolism	1	103	-
AtSRS4	ath40	Pentose and glucuronate interconversions	1	108	-
	ath4075	Plant hormone signal transduction	2	291	-
	ath310	Lysine degradation	1	31	-
	ath3440	Homologous recombination	1	60	-
AtSRS5	ath2010	ABC transporters	1	68	-
	ath940	Phenylpropanoid biosynthesis	1	128	-
	ath4016	MAPK signaling pathway - plant	1	139	-
	ath520	Amino sugar and nucleotide sugar metabolism	1	133	-
AtSRS06	ath4016	MAPK signaling pathway - plant	2	139	-
	ath4075	Plant hormone signal transduction	5	291	-

## Sheet: SP7 Tissue Expression Data
				Expression of AtSRS Genes in Different Tissues
	In silico relative gene expression of each AtSRS gene in different types of tissues within each column												Relative gene expression of different AtSRS s in each kind of tissue.
	AtSHI	AtSTY1	AtSTY2	AtSRS3	AtLRP1	AtSRS4	AtSRS5	AtSRS6	AtSRS7	AtSRS8								AtSHI	AtSTY1	AtSTY2	AtSRS3	AtLRP1	AtSRS4	AtSRS5	AtSRS6	AtSRS7	AtSRS8
Germinating seeds 1	-0.844167	-0.430679	-0.257198	-0.76998	-0.489158	-0.612091	-0.477179	1.17466	-0.200481	-0.25036							Germinating seeds 1	-0.388264	-0.284727	-0.0776529	-0.440033	-0.336496	-0.388264	-0.388264	3.132	-0.388264	-0.440033
Germinating seeds 2	-0.742496	-0.242213	-0.156482	-0.596446	-0.398883	2.02344	-0.477179	-0.659839	-0.200481	-0.25036							Germinating seeds 2	-0.497442	0.105518	0.406998	-0.798923	-0.497442	1.61292	-0.798923	2.21588	-0.798923	-0.949663
Germinating seeds 3	-0.589988	-0.100864	-0.20684	-0.422911	-0.0377819	2.18817	-0.477179	-0.62162	-0.253811	-0.25036							Germinating seeds 3	-0.204726	0.380206	0.0877399	-0.789659	-0.0584933	1.55007	-0.935892	2.135	-1.08213	-1.08213
Anthers of the young flower	-0.793331	-0.524912	-0.458628	1.1389	-0.308608	-0.776812	-0.438994	0.677816	-0.147151	-0.25036							Anthers of the young flower	-0.393835	-0.458399	-0.329272	0.187233	-0.264709	-0.522962	-0.393835	3.09258	-0.393835	-0.522962
Carpels of the mature flower	1.64679	1.45398	-0.257198	-0.422911	0.50387	-0.44737	0.897505	1.02178	0.119499	-0.25036							Carpels of the mature flower	1.27122	0.946453	-0.723758	-0.955732	-0.44539	-0.955732	0.668084	1.96714	-0.723758	-1.04852
Carpels of the young flower	-0.386645	0.323184	1.00175	-0.422911	-0.0377819	0.376235	0.210163	2.35944	-0.0404912	-0.25036							Carpels of the young flower	-0.371647	-0.0371647	0.445976	-0.668965	-0.483141	-0.483141	-0.0371647	2.97318	-0.594635	-0.743294
Opened anthers	-0.488317	-0.572028	-0.458628	0.0976937	3.84405	-0.776812	-0.438994	-1.30956	-0.253811	-0.25036							Opened anthers	0.0579053	-0.521147	-0.304003	-0.159239	3.09793	-0.521147	-0.376384	-0.231621	-0.521147	-0.521147
Petiole of the mature leaf	0.020041	-0.477795	-0.609702	-0.596446	-0.579434	-0.776812	-0.477179	1.36575	-0.253811	-0.25036							Petiole of the mature leaf	0.394624	-0.366097	-0.461188	-0.413642	-0.413642	-0.461188	-0.413642	3.05715	-0.461188	-0.461188
Petiole of the senescent leaf	0.579235	-0.524912	-0.609702	-0.76998	-0.489158	-0.776812	-0.362622	0.0280978	-0.253811	-0.25036							Petiole of the senescent leaf	1.67124	-0.505259	-0.582992	-0.582992	-0.427527	-0.582992	-0.272063	2.44856	-0.582992	-0.582992
Petiole of the young leaf	0.579235	-0.524912	-0.609702	-0.76998	-0.489158	-0.776812	-0.362622	0.0280978	-0.253811	-0.25036							Petiole of the young leaf	-0.291448	-0.220363	-0.291448	-0.149278	-0.504702	-0.220363	-0.362533	3.12063	-0.504702	-0.575787
Petals of the mature flower	-0.640824	-0.572028	-0.609702	3.39486	-0.308608	-0.117928	-0.515365	-0.965588	-0.253811	-0.25036							Petals of the mature flower	9.79528e-17	-0.705825	-0.705825	2.68213	-0.141165	-0.141165	-0.705825	1.12932	-0.705825	-0.705825
Sepals of the mature flower	-0.335809	-0.524912	0.850673	-0.596446	-0.579434	0.211514	-0.477179	-0.850932	-0.253811	-0.25036							Sepals of the mature flower	0.508871	-0.647654	2.59061	-0.647654	-0.647654	-0.0693915	-0.647654	1.08713	-0.763306	-0.763306
Flower	0.431811	0.290202	-0.0557665	0.357996	0.0524934	-0.249705	0.0612385	0.845978	-0.0991541	0.997586							Flower	0.552513	0.0484661	-0.42327	-0.714067	-0.617135	-0.927317	-0.158322	2.76903	-0.946704	0.416808
Whole mature leaf	-0.335809	-0.524912	-0.458628	-0.596446	-0.669709	0.046793	-0.515365	-0.162996	-0.253811	-0.25036							Whole mature leaf	0.57384	-0.469506	-0.260836	-0.469506	-0.57384	-0.0521673	-0.57384	2.97353	-0.57384	-0.57384
Ovules from 6th and 7th flowers	3.17186	4.13961	-0.357913	-0.76998	0.233044	-0.612091	3.22683	2.09191	-0.0404912	-0.25036							Ovules from 6th and 7th flowers	0.971238	1.44617	-0.809761	-0.928494	-0.691027	-0.904747	1.39868	1.27994	-0.833507	-0.928494
Pod of the senescent silique	-0.640824	-0.572028	-0.559344	0.271229	-0.0377819	-0.282649	-0.438994	-1.00381	-0.253811	-0.25036							Pod of the senescent silique	0.39469	-1.01492	-0.732996	0.676612	0.958533	-0.169153	-0.451075	2.36814	-1.01492	-1.01492
Pod of the silique	-0.640824	-0.572028	-0.559344	0.271229	-0.0377819	-0.282649	-0.438994	-1.00381	-0.253811	-0.25036							Pod of the silique	-0.585667	-0.262292	-0.456317	-0.197618	-0.29463	-0.0359305	-0.520992	2.93911	-0.585667	-0.585667
Seedling cotyledons	-0.183302	-0.0537476	-0.0557665	-0.249376	-0.579434	2.84705	-0.400808	-0.354089	-0.200481	0.061627							Seedling cotyledons	0.45763	0.105607	0.105607	-0.833122	-1.0678	1.39636	-0.833122	2.21775	-1.0678	-0.481098
Seedling hypocotyl	-0.844167	-0.383562	-0.609702	1.31244	-0.669709	-0.776812	-0.477179	-0.354089	-0.253811	-0.25036							Seedling hypocotyl	-0.4388	-0.0830163	-0.557395	0.865741	-0.557395	-0.557395	-0.4388	2.88185	-0.557395	-0.557395
Seedling meristem	1.18926	1.78379	0.901031	-0.76998	0.233044	1.85872	0.133791	0.0280978	-0.147151	-0.25036							Seedling meristem	1.23142	1.77205	0.570659	-1.23142	-0.630729	-0.270312	-0.210243	1.11128	-1.11128	-1.23142
Seedling root	-0.640824	-0.477795	-0.408271	1.31244	0.68442	-0.612091	-0.171694	-0.124777	-0.200481	-0.25036							Seedling root	-0.353706	-0.6658	-0.457738	0.374513	0.686607	-0.769832	0.0624188	2.76723	-0.769832	-0.873863
Dry seeds	-0.742496	-0.572028	0.901031	-0.76998	-0.669709	-0.776812	-0.438994	-1.1949	-0.253811	-0.25036							Dry seeds	-0.141996	-0.496987	3.05292	-0.496987	-0.496987	-0.496987	-0.260326	0.331325	-0.496987	-0.496987
Young seeds	1.36211	0.3703	-0.488843	-0.631153	-0.416938	-0.631858	0.928053	1.02178	-0.168483	4.94941							Young seeds	0.54629	-0.245623	-0.816838	-0.868767	-0.803856	-0.86617	0.332084	1.21487	-0.842802	2.35081
Seeds	-0.0943395	-0.336446	-0.332734	-0.596446	-0.105488	0.129153	-0.391262	-0.506964	-0.253811	-0.25036							Seeds	1.26836	-0.242429	-0.17216	-0.804583	-0.0667558	-0.17216	-0.488372	2.56834	-0.945122	-0.945122
Senescent silique	-0.742496	-0.524912	0.296738	-0.76998	-0.489158	-0.44737	-0.438994	-1.27134	-0.253811	-0.25036							Senescent silique	-0.0614588	-0.471184	3.01148	-0.676047	-0.266321	-0.266321	-0.266321	0.348267	-0.676047	-0.676047
Silique	-0.361227	-0.430679	-0.458628	-0.162609	-0.308608	-0.200289	-0.44854	-0.220324	-0.253811	-0.25036							Silique	0.49295	-0.361877	-0.361877	-0.304888	-0.2479	-0.304888	-0.504348	3.00044	-0.703808	-0.703808
Stigmatic tissue	1.69762	0.276067	4.42607	2.00658	2.67048	-0.776812	3.3032	-1.11846	5.07918	-0.25036							Stigmatic tissue	0.206785	-0.657001	1.48938	-0.709352	-0.15967	-1.12816	1.48938	-0.89258	1.48938	-1.12816

## Sheet: SP8 HORMONE data
								Expression Profiles of AtSRS Genes in Response to Plant Hormone
Z score value
		ABA						Meja						GA						Zeatin						ACC					IAA
	30 min	1h	3 h				30 min	1h	3 h				30 min	1h	3 h				30 min	1h	3 h				30 min	1h	3 h			30 min	1h	3 h
AtSHI	-0.104342	-1.31248	-0.761837			AtSHI	-0.435475	-0.743311	-1.21699			AtSHI	-0.827402	-1.23093	-1.03262			AtSHI	0.426487	-0.581377	-0.697602			AtSHI	0.248557	-1.04813	-1.1791		AtSHI	-0.3175	-1.35915	-0.334712
AtSTY2	1.53411	2.13998	1.55031			AtSTY2	-1.43872	1.05834	-0.362789			AtSTY2	1.89223	2.23827	-1.49449			AtSTY2	0.311664	1.96215	0.225695			AtSTY2	-2.21322	0.934819	0.515998		AtSTY2	1.75684	2.0066	-0.262398
AtLRP1	0.329946	0.202763	0.816888			AtLRP1	0.452012	1.34661	1.32253			AtLRP1	0.582779	0.205155	0.191347			AtLRP1	-0.348571	-0.116907	0.800191			AtLRP1	1.15553	1.08354	1.10215		AtLRP1	-0.132292	0.656964	2.09505
AtSRS4	0.922155	-0.449367	0.717441			AtSRS4	-0.70558	0.395335	1.69192			AtSRS4	-0.877766	-0.375734	1.87718			AtSRS4	-1.84128	-0.315966	1.88763			AtSRS4	-0.195673	1.08354	1.56157		AtSRS4	-0.354542	-0.30944	0.359506
AtSRS5	-1.70331	-0.487728	-0.202446			AtSRS5	1.6096	-1.46397	-0.432049			AtSRS5	0.17987	-0.214376	0.260628			AtSRS5	1.77566	0.524503	-1.35417			AtSRS5	-0.121634	-0.874623	-0.307788		AtSRS5	1.09008	-0.342764	-1.49174
AtSRS6	-0.874215	-0.372646	-1.58228			AtSRS6	-0.551234	-1.01716	-0.709088			AtSRS6	0.280597	-0.472548	0.260628			AtSRS6	-0.118924	-1.55455	-0.595014			AtSRS6	0.655768	-1.37036	-0.561261		AtSRS6	-1.46579	-0.692669	-0.247935
AtSRS8	-0.104342	0.279485	-0.53808			AtSRS8	1.06939	0.424161	-0.29353			AtSRS8	-1.23031	-0.149832	-0.0626827			AtSRS8	-0.205042	0.0821511	-0.26673			AtSRS8	0.470672	0.191213	-1.13158		AtSRS8	-0.576792	0.0404652	-0.117769

## Sheet: SP9 ABIOTIC STRESS data
											Expression Profiles of AtSRS Genes in Response to Stresses
															Z score value
		Cold shoot								Cold root									Osmotic shoot								Osmotic root								Salt shoot								Salt root
		30 min	1h	3h	6h	12h	24h			30 min	1h	3h	6h	12h	24h				30 min	1h	3h	6h	12h	24h			30 min	1h	3h	6h	12h	24h			30 min	1h	3h	6h	12h	24h			30 min	1h	3h	6h	12h	24h
AtSHI		0.873794	0.830959	0	0.149153	1.29371	-0.00252824		AtSHI	0.622739	0.610284	-1.16387	0.620281	0.548112	0.790454			AtSHI	0.898153	0.860185	0.710697	-0.812178	-0.448019	-0.397061		AtSHI	-0.931769	0.201665	-0.0402172	-0.504943	-0.419148	-0.712586		AtSHI	0.281403	0.523492	0.423064	-0.832814	1.83985	-0.862267		AtSHI	1.88222	0.0523632	-0.0701517	0.0228974	-0.759369	0.169575
AtSTY2		-1.22213	-1.67414	0.175806	-0.760318	0.647833	0.718022		AtSTY2	-1.81233	-0.915426	-0.978539	-0.219683	1.16536	1.57677			AtSTY2	1.69398	-1.60965	0.813996	-1.00555	0.88537	0.48702		AtSTY2	-1.34284	1.44527	0.0134057	0.902276	0.0419148	0.171449		AtSTY2	0.333514	-0.590872	1.1851	0.0780763	-0.0090189	0.431133		AtSTY2	-0.922097	0.857951	-0.911972	-1.8089	-1.28307	-1.35075
AtSRS5		-1.19261	1.01426	-1.88992	2.05904	0.471685	1.46385		AtSRS5	0.143709	1.88171	-0.126024	1.39563	0.74563	-0.823562			AtSRS5	-1.03458	0.391767	-2.14036	0.928203	1.41873	1.86743		AtSRS5	1.32914	0.168054	-1.07246	-0.62911	-0.502978	0.305394		AtSRS5	-1.9594	1.45645	-1.82364	1.40537	-0.550153	1.77526		AtSRS5	0.12358	0.676694	-1.16919	0.0610598	-0.104741	-0.912195
AtSRS6		1.52324	-0.940939	1.53831	-0.960402	-0.585203	-0.394406		AtSRS6	1.46104	-0.733794	0.392898	0.10338	-1.84679	-1.48572			AtSRS6	-0.920891	-0.928318	0.132223	-0.794598	-1.72807	-1.29665		AtSRS6	0.232942	-1.68054	-0.72391	-1.20855	-1.00596	-1.35552		AtSRS6	0.489849	-1.49791	-0.076204	-1.35332	-0.144302	-0.760824		AtSRS6	-0.589381	-1.92133	0.584597	0.519008	0.59353	0.798171
AtSRS8		0.017712	0.769859	0.175806	-0.487477	-1.82803	-1.78494		AtSRS8	-0.415159	-0.842773	1.87553	-1.89961	-0.612305	-0.057939			AtSRS8	-0.636665	1.28602	0.483439	1.68413	-0.128005	-0.660734		AtSRS8	0.712529	-0.134443	1.82318	1.44033	1.88617	1.59126		AtSRS8	0.85463	0.108845	0.291677	0.702687	-1.13638	-0.583298		AtSRS8	-0.49432	0.334319	1.56672	1.20593	1.55365	1.2952
[truncated: 84 more columns]

## Sheet: SP9 Predicted localization Data
					Predicted localization Data
Protein_ID	Localizations	Signals	Cytoplasm	Nucleus	Extracellular	Cell membrane	Mitochondrion	Plastid	Endoplasmic reticulum	Lysosome/Vacuole	Golgi apparatus	Peroxisome
AtSHI	Nucleus	Nuclear localization signal	0.1574	0.9696	0.0133	0.032	0.0358	0.0605	0.0429	0.0369	0.009	0.007
AtSTY1	Nucleus	Nuclear localization signal	0.1669	0.9685	0.0113	0.0339	0.0301	0.0408	0.0528	0.0376	0.0103	0.006
AtSTY2	Nucleus	Nuclear localization signal	0.2145	0.9743	0.011	0.0349	0.0385	0.0477	0.0531	0.0384	0.0095	0.0055
AtLRP1	Nucleus	Nuclear localization signal	0.1834	0.9699	0.015	0.0433	0.0453	0.0501	0.0578	0.0328	0.0157	0.0056
AtSRS3	Nucleus	Nuclear localization signal	0.2837	0.962	0.0224	0.0516	0.0667	0.05	0.0611	0.0351	0.0102	0.024
AtSRS4	Nucleus	Nuclear localization signal	0.2316	0.9653	0.0096	0.0248	0.0271	0.0232	0.0423	0.0349	0.0083	0.0049
AtSRS5	Nucleus	Nuclear localization signal	0.1905	0.9593	0.0164	0.0463	0.035	0.0418	0.0384	0.0412	0.0115	0.0051
AtSR6	Nucleus	Nuclear localization signal	0.1685	0.9819	0.0151	0.0175	0.0214	0.0783	0.0304	0.0126	0.0047	0.0245
AtSRS7	Nucleus	Nuclear localization signal	0.1852	0.9605	0.0125	0.0486	0.0364	0.0471	0.0338	0.0336	0.0117	0.0049
AtSRS8	Nucleus	Nuclear localization signal	0.3089	0.9286	0.0816	0.0505	0.043	0.0264	0.0443	0.0312	0.0115	0.0097

[truncated: 2 more sheets: SP10 CIRCOS data, SP11 Protein Structure Data]
