# Supplementary material
Source: Research Square preprint supplement (doi:10.21203/rs.3.rs-9439008/v1)
Supplement: Supplementary file 4 [file f451ee405eb6a3d551c307fc.docx]

| **Gene pairs** | **Ka** | **Ks** | **Ka/Ks Ratio** |
| --- | --- | --- | --- |
| *AtSTY2-AtSTY1* | 0.30 | 1.76 | 0.17 |
| *AtSHI-AtSTY1* | 0.17 | 1.27 | 0.14 |
| *AtSTY2-AtSHI* | 0.30 | 1.76 | 0.17 |
| *AtSRS4-AtSHI* | 0.57 | 0 | - |
| *AtSRS4 -AtSTY1* | 0.58 | 0 | - |
| *AtSRS3-AtSTY2* | 0.45 | - | - |
| *AtSTY2-AtSRS7* | 0.50 | 3.90 | 0.13 |
| *AtSTY2-AtSRS7* | 0.50 | 3.90 | 0.13 |
