# Supplementary material
Source: Research Square preprint supplement (doi:10.21203/rs.3.rs-9439008/v1)

# Multiple Sequence Alignment of 10 SRS Family Genes of Arabidopsis

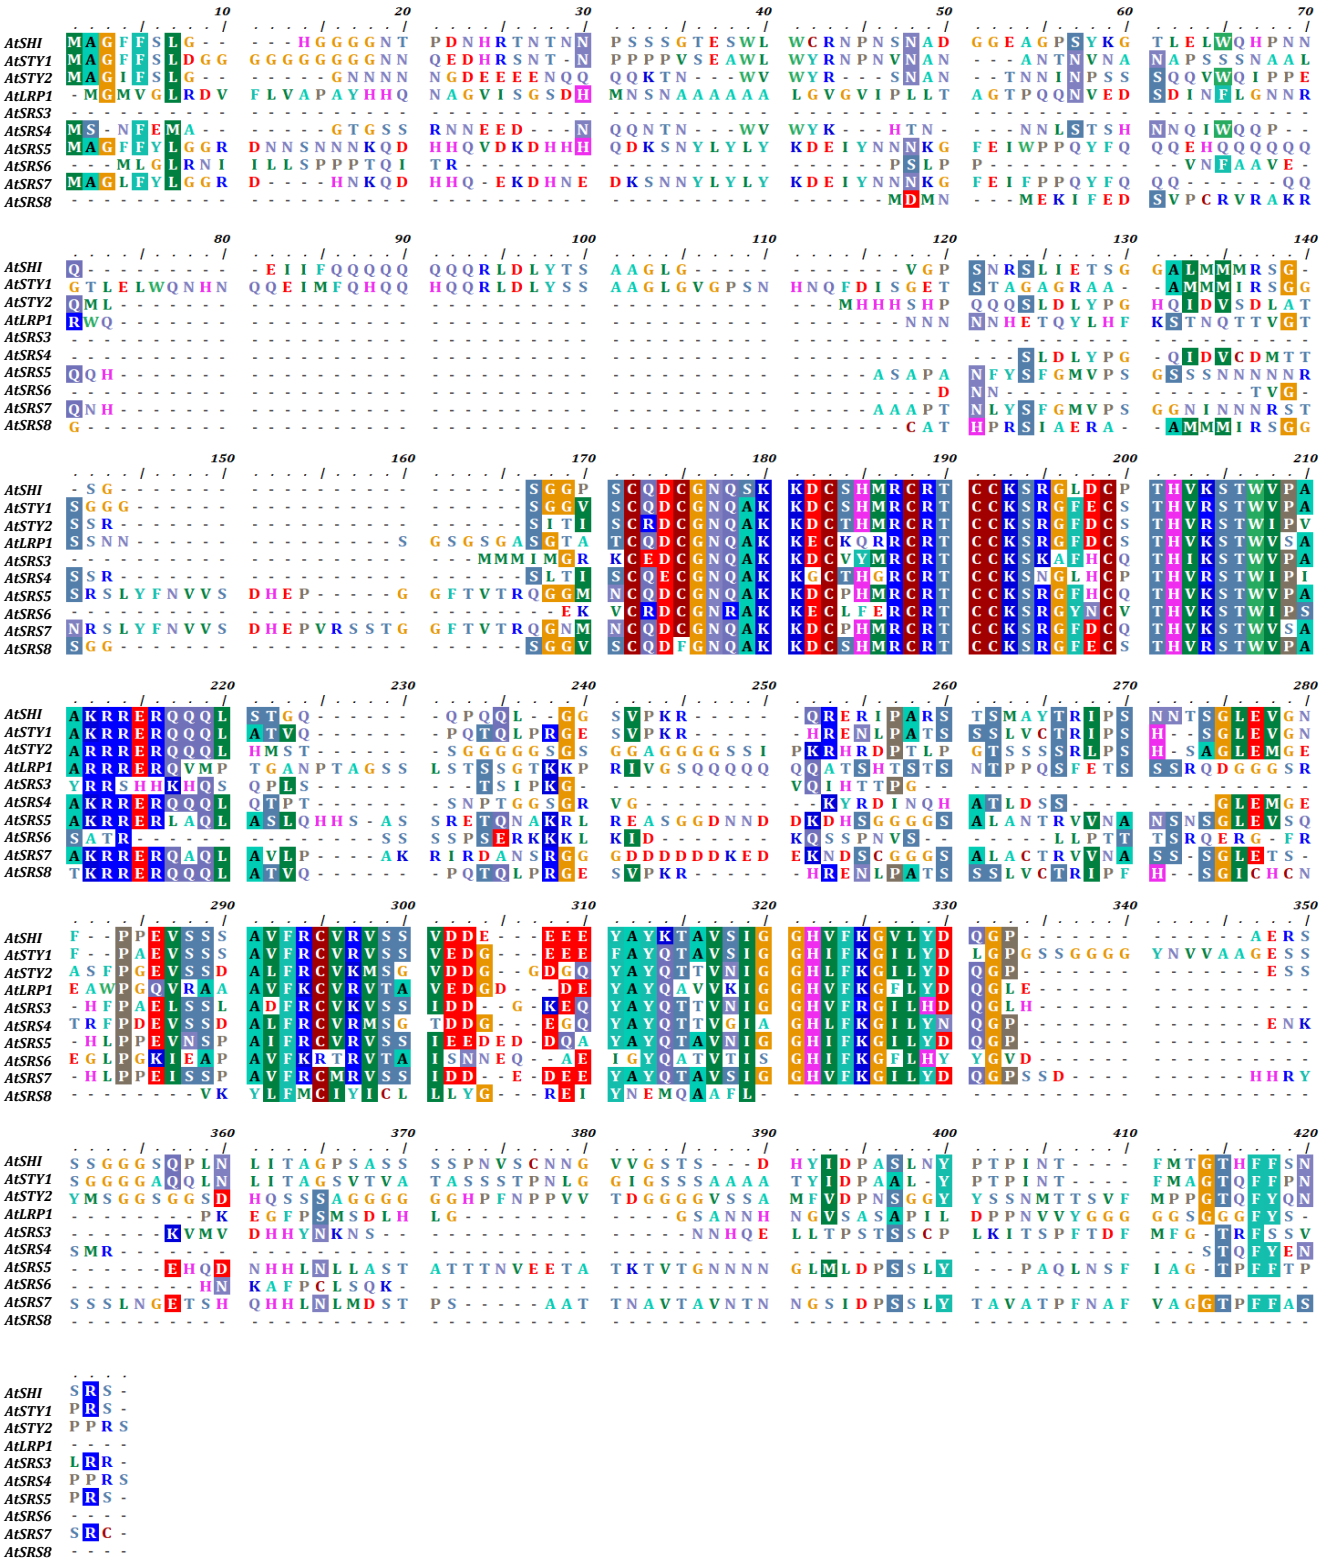

Supplement: Supplementary file 3 [file b2d35babfe5d7d8e63b8925c.pdf]
